# Supplementary material for: Using BioPAX-Parser (BiP) to enrich lists of genes or proteins with pathway data
Source: BMC Bioinformatics. 2021 Sep 30;22(Suppl 13):376. doi: 10.1186/s12859-021-04297-z (PMC8482563; doi:10.1186/s12859-021-04297-z)
Supplement: Supplementary file 2 — Additional file 2. The list of relevant enriched pathways(p value \documentclass[12pt]{minimal} \usepackage{amsmath} \usepackage{wasysym} \usepackage{amsfonts} \usepackage{amssymb} \usepackage{amsbsy} \usepackage{mathrsfs} \usepackage{upgreek} \setlength{\oddsidemargin}{-69pt} \begin{document}$$\le 0.005$$\end{document}≤0.005) obtained by BiP using each cancergene list and the related intersection between the two lists ofenriched pathways referring to the same cancer type. [file 12859_2021_4297_MOESM2_ESM.xlsx]

## Sheet: GSE41011_Enrich
Pathway Source	PathwayName	ProteinsIntersection	Pvalue	FDRCorrection	BonferroniCorrection
KEGG	Epstein-Barr virus infection	82	1.31485e-08	4.4179e-06	4.4179e-06
KEGG	Pathways in cancer	149	4.09808e-08	6.88478e-06	1.37696e-05
KEGG	Lysosome	52	7.94791e-08	8.90166e-06	2.6705e-05
KEGG	Hepatitis C	59	6.18547e-06	0.000519579	0.00207832
KEGG	MicroRNAs in cancer	88	1.23852e-05	0.000832287	0.00416144
KEGG	Tuberculosis	68	2.59658e-05	0.00145408	0.0087245
KEGG	MAPK signaling pathway	78	3.041e-05	0.00145968	0.0102177
KEGG	Measles	55	3.12644e-05	0.00131311	0.0105048
KEGG	Human papillomavirus infection	82	3.43038e-05	0.00128067	0.0115261
KEGG	Leukocyte transendothelial migration	43	3.56666e-05	0.0011984	0.011984
KEGG	Colorectal cancer	43	3.56666e-05	0.00108945	0.011984
KEGG	Metabolic pathways	372	3.99267e-05	0.00111795	0.0134154
KEGG	Small cell lung cancer	34	8.34733e-05	0.00215746	0.028047
KEGG	mRNA surveillance pathway	41	8.54789e-05	0.00205149	0.0287209
KEGG	Transcriptional misregulation in cancer	99	0.000110983	0.00248603	0.0372904
KEGG	Human cytomegalovirus infection	71	0.000118071	0.00247949	0.0396718
KEGG	Human T-cell leukemia virus 1 infection	75	0.000129544	0.00256039	0.0435267
KEGG	Oxidative phosphorylation	57	0.000153352	0.00286258	0.0515264
KEGG	Epithelial cell signaling in Helicobacter pylori infection	27	0.000159892	0.00282756	0.0537236
KEGG	Neurotrophin signaling pathway	52	0.000180195	0.00302728	0.0605457
KEGG	Autophagy - animal	65	0.000204371	0.00326994	0.0686687
KEGG	Proteoglycans in cancer	79	0.000212181	0.00324058	0.0712928
KEGG	Viral carcinogenesis	66	0.000235806	0.00344482	0.0792309
KEGG	RNA transport	67	0.000270454	0.00378636	0.0908725
KEGG	Mitophagy - animal	36	0.000352344	0.0047355	0.118388
KEGG	Endocrine resistance	36	0.000352344	0.00455337	0.118388
KEGG	Kaposi sarcoma-associated herpesvirus infection	70	0.000395103	0.00491683	0.132754
KEGG	Parkinson disease	45	0.00043896	0.00526751	0.14749
KEGG	Neuroactive ligand-receptor interaction	45	0.000475574	0.0055101	0.159793
KEGG	Pancreatic cancer	35	0.000535488	0.00599747	0.179924
KEGG	Herpes simplex virus 1 infection	67	0.000643307	0.00697262	0.216151
KEGG	Platinum drug resistance	31	0.000715527	0.00751303	0.240417
KEGG	Endocytosis	68	0.000719514	0.00732596	0.241757
KEGG	Toll-like receptor signaling pathway	45	0.000765083	0.00756082	0.257068
KEGG	Hepatitis B	63	0.000933278	0.00895947	0.313582
KEGG	Apoptosis	56	0.000940416	0.00877721	0.31598
KEGG	Chronic myeloid leukemia	32	0.000944111	0.00857355	0.317221
KEGG	Salmonella infection	83	0.00097066	0.00858268	0.326142
KEGG	Thyroid cancer	17	0.00128101	0.0110364	0.430418
KEGG	Adherens junction	36	0.00128173	0.0107665	0.430661
KEGG	p53 signaling pathway	41	0.00186571	0.0152898	0.62688
KEGG	TNF signaling pathway	52	0.00212148	0.0169718	0.712817
KEGG	Cushing syndrome	47	0.00274093	0.0214175	0.920952
KEGG	Focal adhesion	41	0.00306184	0.0233813	1
KEGG	Hepatocellular carcinoma	48	0.0030978	0.0231302	1
KEGG	Prostate cancer	35	0.00325931	0.0238071	1
KEGG	Base excision repair	19	0.00328608	0.023492	1
KEGG	JAK-STAT signaling pathway	24	0.00347301	0.0243111	1
KEGG	Pyruvate metabolism	17	0.00358074	0.0245536	1
KEGG	Porphyrin and chlorophyll metabolism	15	0.00375308	0.0252207	1
KEGG	Chemokine signaling pathway	36	0.00384527	0.0253335	1
KEGG	Gastric cancer	43	0.00401155	0.0259208	1
KEGG	RNA polymerase	20	0.00465015	0.0294802	1

## Sheet: COAD_Enrich
Pathway Source	PathwayID	PathwayName	ProteinsIntersection	Pvalue	FDRCorrection	BonferroniCorrection
KEGG	Metabolic pathways	Metabolic pathways	48	4.32993e-152	1.26001e-149	1.26001e-149
KEGG	Cytokine-cytokine receptor interaction	Cytokine-cytokine receptor interaction	15	3.96784e-60	5.7732e-58	1.15464e-57
KEGG	Pathways of neurodegeneration - multiple diseases	Pathways of neurodegeneration - multiple diseases	10	1.12888e-38	1.09502e-36	3.28505e-36
KEGG	Pathways in cancer	Pathways in cancer	25	2.94715e-36	2.14405e-34	8.57622e-34
KEGG	Alzheimer disease	Alzheimer disease	4	4.28719e-29	2.49514e-27	1.24757e-26
KEGG	Transcriptional misregulation in cancer	Transcriptional misregulation in cancer	14	2.44038e-28	1.18358e-26	7.1015e-26
KEGG	MAPK signaling pathway	MAPK signaling pathway	5	2.04464e-27	8.49986e-26	5.9499e-25
KEGG	Shigellosis	Shigellosis	9	9.21349e-26	3.35141e-24	2.68112e-23
KEGG	Salmonella infection	Salmonella infection	11	2.75209e-25	8.89842e-24	8.00857e-23
KEGG	NOD-like receptor signaling pathway	NOD-like receptor signaling pathway	6	5.96554e-25	1.73597e-23	1.73597e-22
KEGG	Neuroactive ligand-receptor interaction	Neuroactive ligand-receptor interaction	11	1.00065e-24	2.64717e-23	2.91189e-22
KEGG	Ribosome	Ribosome	9	4.70398e-24	1.14071e-22	1.36886e-21
KEGG	Cell adhesion molecules	Cell adhesion molecules	3	6.89505e-24	1.54343e-22	2.00646e-21
KEGG	Herpes simplex virus 1 infection	Herpes simplex virus 1 infection	7	1.85337e-21	3.85236e-20	5.39331e-19
KEGG	Viral protein interaction with cytokine and cytokine receptor	Viral protein interaction with cytokine and cytokine receptor	2	1.90593e-21	3.6975e-20	5.54625e-19
KEGG	Proteoglycans in cancer	Proteoglycans in cancer	12	3.07694e-21	5.59618e-20	8.95389e-19
KEGG	Pathogenic Escherichia coli infection	Pathogenic Escherichia coli infection	5	3.12325e-21	5.34627e-20	9.08865e-19
KEGG	Epstein-Barr virus infection	Epstein-Barr virus infection	9	5.74561e-21	9.28873e-20	1.67197e-18
KEGG	Influenza A	Influenza A	7	1.31459e-20	2.0134e-19	3.82546e-18
KEGG	Amyotrophic lateral sclerosis	Amyotrophic lateral sclerosis	11	1.38146e-20	2.01003e-19	4.02006e-18
KEGG	Human papillomavirus infection	Human papillomavirus infection	13	1.4841e-20	2.05653e-19	4.31872e-18
KEGG	RNA transport	RNA transport	8	8.47655e-20	1.12122e-18	2.46668e-17
KEGG	MicroRNAs in cancer	MicroRNAs in cancer	17	4.1931e-19	5.30518e-18	1.22019e-16
KEGG	Tuberculosis	Tuberculosis	8	5.76644e-19	6.99181e-18	1.67803e-16
KEGG	Apoptosis	Apoptosis	5	1.2281e-18	1.42951e-17	3.57378e-16
KEGG	Ubiquitin mediated proteolysis	Ubiquitin mediated proteolysis	10	1.38654e-18	1.55185e-17	4.03482e-16
KEGG	Human cytomegalovirus infection	Human cytomegalovirus infection	11	3.66357e-18	3.94851e-17	1.0661e-15
KEGG	Endocytosis	Endocytosis	11	6.76209e-18	7.02774e-17	1.96777e-15
KEGG	Hematopoietic cell lineage	Hematopoietic cell lineage	2	7.612e-18	7.63825e-17	2.21509e-15
KEGG	Huntington disease	Huntington disease	4	7.83906e-18	7.60389e-17	2.28117e-15
KEGG	Tight junction	Tight junction	5	8.82198e-18	8.28128e-17	2.5672e-15
KEGG	Protein processing in endoplasmic reticulum	Protein processing in endoplasmic reticulum	6	8.93788e-18	8.12789e-17	2.60092e-15
KEGG	Measles	Measles	4	1.52351e-17	1.34346e-16	4.43341e-15
KEGG	Kaposi sarcoma-associated herpesvirus infection	Kaposi sarcoma-associated herpesvirus infection	12	1.66965e-17	1.42902e-16	4.85867e-15
KEGG	Axon guidance	Axon guidance	9	2.10682e-17	1.75167e-16	6.13085e-15
KEGG	Rap1 signaling pathway	Rap1 signaling pathway	4	2.95766e-17	2.39077e-16	8.60678e-15
KEGG	cAMP signaling pathway	cAMP signaling pathway	6	6.18786e-17	4.86667e-16	1.80067e-14
KEGG	Autophagy - animal	Autophagy - animal	10	1.0411e-16	7.97267e-16	3.02961e-14
KEGG	Prion disease	Prion disease	1	1.17415e-16	8.76093e-16	3.41676e-14
KEGG	Ras signaling pathway	Ras signaling pathway	3	1.7519e-16	1.27451e-15	5.09803e-14
KEGG	Human T-cell leukemia virus 1 infection	Human T-cell leukemia virus 1 infection	15	1.86746e-16	1.32544e-15	5.4343e-14
KEGG	Human immunodeficiency virus 1 infection	Human immunodeficiency virus 1 infection	10	1.9177e-16	1.32869e-15	5.58049e-14
KEGG	Spliceosome	Spliceosome	4	2.14935e-16	1.45456e-15	6.2546e-14
KEGG	Hepatitis C	Hepatitis C	6	2.23294e-16	1.47678e-15	6.49784e-14
KEGG	Viral carcinogenesis	Viral carcinogenesis	11	2.58852e-16	1.67391e-15	7.5326e-14
KEGG	C-type lectin receptor signaling pathway	C-type lectin receptor signaling pathway	3	3.42369e-16	2.16585e-15	9.96293e-14
KEGG	TNF signaling pathway	TNF signaling pathway	6	4.23305e-16	2.62089e-15	1.23182e-13
KEGG	Spinocerebellar ataxia	Spinocerebellar ataxia	3	6.68369e-16	4.05199e-15	1.94495e-13
KEGG	Oxidative phosphorylation	Oxidative phosphorylation	7	7.06951e-16	4.19842e-15	2.05723e-13
KEGG	Neurotrophin signaling pathway	Neurotrophin signaling pathway	5	8.41944e-16	4.90012e-15	2.45006e-13
KEGG	IL-17 signaling pathway	IL-17 signaling pathway	4	1.54541e-15	8.81795e-15	4.49715e-13
KEGG	Phagosome	Phagosome	2	1.79659e-15	1.0054e-14	5.22807e-13
KEGG	Fluid shear stress and atherosclerosis	Fluid shear stress and atherosclerosis	5	3.06081e-15	1.68056e-14	8.90695e-13
KEGG	Yersinia infection	Yersinia infection	8	3.76313e-15	2.02791e-14	1.09507e-12
KEGG	PI3K-Akt signaling pathway	PI3K-Akt signaling pathway	8	6.96733e-15	3.68635e-14	2.02749e-12
KEGG	Regulation of actin cytoskeleton	Regulation of actin cytoskeleton	5	1.10653e-14	5.75002e-14	3.22001e-12
KEGG	FoxO signaling pathway	FoxO signaling pathway	6	1.90592e-14	9.73021e-14	5.54622e-12
KEGG	Natural killer cell mediated cytotoxicity	Natural killer cell mediated cytotoxicity	5	2.09937e-14	1.0533e-13	6.10916e-12
KEGG	Platelet activation	Platelet activation	4	2.1071e-14	1.03927e-13	6.13167e-12
KEGG	Chagas disease	Chagas disease	2	2.69993e-14	1.30947e-13	7.85681e-12
KEGG	T cell receptor signaling pathway	T cell receptor signaling pathway	4	4.03549e-14	1.92513e-13	1.17433e-11
KEGG	Wnt signaling pathway	Wnt signaling pathway	7	5.56397e-14	2.61148e-13	1.61912e-11
KEGG	RIG-I-like receptor signaling pathway	RIG-I-like receptor signaling pathway	1	6.01959e-14	2.78048e-13	1.7517e-11
KEGG	Cushing syndrome	Cushing syndrome	6	6.69746e-14	3.04525e-13	1.94896e-11
KEGG	cGMP-PKG signaling pathway	cGMP-PKG signaling pathway	4	1.47395e-13	6.59878e-13	4.2892e-11
KEGG	Th17 cell differentiation	Th17 cell differentiation	4	1.47395e-13	6.49879e-13	4.2892e-11
KEGG	Pertussis	Pertussis	2	2.03892e-13	8.85562e-13	5.93326e-11
KEGG	mTOR signaling pathway	mTOR signaling pathway	6	2.33803e-13	1.00054e-12	6.80367e-11
KEGG	Non-alcoholic fatty liver disease	Non-alcoholic fatty liver disease	3	2.61369e-13	1.1023e-12	7.60584e-11
KEGG	Carbon metabolism	Carbon metabolism	3	2.61369e-13	1.08655e-12	7.60584e-11
KEGG	Leukocyte transendothelial migration	Leukocyte transendothelial migration	3	2.61369e-13	1.07125e-12	7.60584e-11
KEGG	Toll-like receptor signaling pathway	Toll-like receptor signaling pathway	5	2.67904e-13	1.08278e-12	7.79601e-11
KEGG	Hepatitis B	Hepatitis B	14	2.75046e-13	1.09642e-12	8.00383e-11
KEGG	Focal adhesion	Focal adhesion	4	2.81081e-13	1.10533e-12	8.17946e-11
KEGG	Sphingolipid signaling pathway	Sphingolipid signaling pathway	3	5.04165e-13	1.95616e-12	1.46712e-10
KEGG	Ribosome biogenesis in eukaryotes	Ribosome biogenesis in eukaryotes	3	5.04165e-13	1.93042e-12	1.46712e-10
KEGG	Lysosome	Lysosome	5	5.04341e-13	1.90602e-12	1.46763e-10
KEGG	Parkinson disease	Parkinson disease	5	5.04341e-13	1.88158e-12	1.46763e-10
KEGG	NF-kappa B signaling pathway	NF-kappa B signaling pathway	12	6.63132e-13	2.44268e-12	1.92971e-10
KEGG	Signaling pathways regulating pluripotency of stem cells	Signaling pathways regulating pluripotency of stem cells	6	8.10572e-13	2.94846e-12	2.35876e-10
KEGG	Peroxisome	Peroxisome	6	2.7899e-12	1.0023e-11	8.1186e-10
KEGG	Chemokine signaling pathway	Chemokine signaling pathway	3	3.58851e-12	1.27348e-11	1.04426e-09
KEGG	AMPK signaling pathway	AMPK signaling pathway	5	6.22681e-12	2.18314e-11	1.812e-09
KEGG	PD-L1 expression and PD-1 checkpoint pathway in cancer	PD-L1 expression and PD-1 checkpoint pathway in cancer	3	6.88286e-12	2.38442e-11	2.00291e-09
KEGG	Insulin signaling pathway	Insulin signaling pathway	6	9.52973e-12	3.26253e-11	2.77315e-09
KEGG	Hepatocellular carcinoma	Hepatocellular carcinoma	9	1.24076e-11	4.19839e-11	3.61061e-09
KEGG	mRNA surveillance pathway	mRNA surveillance pathway	4	1.30807e-11	4.37527e-11	3.80648e-09
KEGG	Apelin signaling pathway	Apelin signaling pathway	4	1.30807e-11	4.32555e-11	3.80648e-09
KEGG	Osteoclast differentiation	Osteoclast differentiation	7	1.34346e-11	4.39265e-11	3.90946e-09
KEGG	ABC transporters	ABC transporters	2	2.19219e-11	7.08808e-11	6.37928e-09
KEGG	Proteasome	Proteasome	2	2.19219e-11	7.01019e-11	6.37928e-09
KEGG	Oxytocin signaling pathway	Oxytocin signaling pathway	4	2.46626e-11	7.80088e-11	7.17681e-09
KEGG	Th1 and Th2 cell differentiation	Th1 and Th2 cell differentiation	3	2.52044e-11	7.88654e-11	7.33448e-09
KEGG	Renal cell carcinoma	Renal cell carcinoma	1	2.89756e-11	8.9701e-11	8.43189e-09
KEGG	Cell cycle	Cell cycle	11	3.06202e-11	9.37946e-11	8.91049e-09
KEGG	HIF-1 signaling pathway	HIF-1 signaling pathway	6	3.22919e-11	9.78849e-11	9.39695e-09
KEGG	Thyroid hormone signaling pathway	Thyroid hormone signaling pathway	6	3.22919e-11	9.68758e-11	9.39695e-09
KEGG	Fanconi anemia pathway	Fanconi anemia pathway	2	4.25504e-11	1.26349e-10	1.23822e-08
KEGG	Necroptosis	Necroptosis	7	4.44773e-11	1.30736e-10	1.29429e-08
KEGG	Biosynthesis of amino acids	Biosynthesis of amino acids	1	5.72973e-11	1.66735e-10	1.66735e-08
KEGG	Cellular senescence	Cellular senescence	12	5.94799e-11	1.71373e-10	1.73086e-08
KEGG	Legionellosis	Legionellosis	2	8.24766e-11	2.35301e-10	2.40007e-08
KEGG	Inflammatory bowel disease	Inflammatory bowel disease	2	8.24766e-11	2.33016e-10	2.40007e-08
KEGG	Pancreatic secretion	Pancreatic secretion	2	8.24766e-11	2.30776e-10	2.40007e-08
KEGG	Phospholipase D signaling pathway	Phospholipase D signaling pathway	4	8.71897e-11	2.4164e-10	2.53722e-08
KEGG	Toxoplasmosis	Toxoplasmosis	4	8.71897e-11	2.3936e-10	2.53722e-08
KEGG	Oocyte meiosis	Oocyte meiosis	3	9.17017e-11	2.49394e-10	2.66852e-08
KEGG	Glutamatergic synapse	Glutamatergic synapse	1	1.13189e-10	3.04982e-10	3.29381e-08
KEGG	Hippo signaling pathway	Hippo signaling pathway	8	1.8452e-10	4.92618e-10	5.36954e-08
KEGG	Hypertrophic cardiomyopathy	Hypertrophic cardiomyopathy	1	2.23374e-10	5.90925e-10	6.50017e-08
KEGG	Adrenergic signaling in cardiomyocytes	Adrenergic signaling in cardiomyocytes	2	3.08539e-10	8.08872e-10	8.97848e-08
KEGG	Fc gamma R-mediated phagocytosis	Fc gamma R-mediated phagocytosis	3	3.31349e-10	8.60916e-10	9.64226e-08
KEGG	Growth hormone synthesis, secretion and action	Growth hormone synthesis, secretion and action	4	5.71145e-10	1.47083e-09	1.66203e-07
KEGG	Dopaminergic synapse	Dopaminergic synapse	2	5.95411e-10	1.51986e-09	1.73265e-07
KEGG	Amoebiasis	Amoebiasis	2	5.95411e-10	1.50665e-09	1.73265e-07
KEGG	Vascular smooth muscle contraction	Vascular smooth muscle contraction	3	6.28135e-10	1.57575e-09	1.82787e-07
KEGG	Relaxin signaling pathway	Relaxin signaling pathway	6	1.19182e-09	2.96427e-09	3.4682e-07
KEGG	Thermogenesis	Thermogenesis	5	1.58749e-09	3.91491e-09	4.61959e-07
KEGG	Purine metabolism	Purine metabolism	4	1.97859e-09	4.8384e-09	5.7577e-07
KEGG	RNA degradation	RNA degradation	7	2.72697e-09	6.61291e-09	7.9355e-07
KEGG	Colorectal cancer	Colorectal cancer	7	2.72697e-09	6.55826e-09	7.9355e-07
KEGG	Malaria	Malaria	1	3.35092e-09	7.99276e-09	9.75117e-07
KEGG	Complement and coagulation cascades	Complement and coagulation cascades	9	3.72222e-09	8.80623e-09	1.08317e-06
KEGG	TGF-beta signaling pathway	TGF-beta signaling pathway	7	4.85901e-09	1.1403e-08	1.41397e-06
KEGG	Insulin resistance	Insulin resistance	7	4.85901e-09	1.13118e-08	1.41397e-06
KEGG	Calcium signaling pathway	Calcium signaling pathway	5	5.30464e-09	1.22512e-08	1.54365e-06
KEGG	Mitophagy - animal	Mitophagy - animal	5	5.30464e-09	1.21547e-08	1.54365e-06
KEGG	Gastric cancer	Gastric cancer	10	7.06867e-09	1.60702e-08	2.05698e-06
KEGG	Dilated cardiomyopathy	Dilated cardiomyopathy	2	8.1225e-09	1.83228e-08	2.36365e-06
KEGG	Adipocytokine signaling pathway	Adipocytokine signaling pathway	2	8.1225e-09	1.81819e-08	2.36365e-06
KEGG	AGE-RAGE signaling pathway in diabetic complications	AGE-RAGE signaling pathway in diabetic complications	7	8.63343e-09	1.91781e-08	2.51233e-06
KEGG	Acute myeloid leukemia	Acute myeloid leukemia	4	1.25378e-08	2.76402e-08	3.64851e-06
KEGG	Bile secretion	Bile secretion	6	1.25714e-08	2.75059e-08	3.65829e-06
KEGG	Valine, leucine and isoleucine degradation	Valine, leucine and isoleucine degradation	1	1.28855e-08	2.79827e-08	3.74968e-06
KEGG	p53 signaling pathway	p53 signaling pathway	9	1.95261e-08	4.20895e-08	5.68208e-06
KEGG	B cell receptor signaling pathway	B cell receptor signaling pathway	4	2.30856e-08	4.93964e-08	6.71791e-06
KEGG	Mineral absorption	Mineral absorption	1	2.52178e-08	5.35649e-08	7.33839e-06
KEGG	Systemic lupus erythematosus	Systemic lupus erythematosus	1	2.52178e-08	5.31767e-08	7.33839e-06
KEGG	Cysteine and methionine metabolism	Cysteine and methionine metabolism	1	2.52178e-08	5.27942e-08	7.33839e-06
KEGG	Fatty acid metabolism	Fatty acid metabolism	1	2.52178e-08	5.24171e-08	7.33839e-06
KEGG	Fc epsilon RI signaling pathway	Fc epsilon RI signaling pathway	3	2.79294e-08	5.76416e-08	8.12746e-06
KEGG	Renin secretion	Renin secretion	2	2.96757e-08	6.08143e-08	8.63563e-06
KEGG	Progesterone-mediated oocyte maturation	Progesterone-mediated oocyte maturation	2	2.96757e-08	6.0389e-08	8.63563e-06
KEGG	Cholinergic synapse	Cholinergic synapse	2	2.96757e-08	5.99696e-08	8.63563e-06
KEGG	GnRH signaling pathway	GnRH signaling pathway	4	4.23937e-08	8.50797e-08	1.23366e-05
KEGG	Salivary secretion	Salivary secretion	3	5.21532e-08	1.03949e-07	1.51766e-05
KEGG	Aldosterone synthesis and secretion	Aldosterone synthesis and secretion	3	5.21532e-08	1.03242e-07	1.51766e-05
KEGG	Choline metabolism in cancer	Choline metabolism in cancer	3	5.21532e-08	1.02545e-07	1.51766e-05
KEGG	Insulin secretion	Insulin secretion	3	5.21532e-08	1.01856e-07	1.51766e-05
KEGG	PPAR signaling pathway	PPAR signaling pathway	6	7.14015e-08	1.38519e-07	2.07778e-05
KEGG	Prostate cancer	Prostate cancer	7	8.34754e-08	1.6087e-07	2.42913e-05
KEGG	Arrhythmogenic right ventricular cardiomyopathy	Arrhythmogenic right ventricular cardiomyopathy	1	9.61747e-08	1.84124e-07	2.79868e-05
KEGG	Endometrial cancer	Endometrial cancer	3	9.71398e-08	1.84756e-07	2.82677e-05
KEGG	Bacterial invasion of epithelial cells	Bacterial invasion of epithelial cells	3	9.71398e-08	1.83556e-07	2.82677e-05
KEGG	Rheumatoid arthritis	Rheumatoid arthritis	5	1.03249e-07	1.93841e-07	3.00454e-05
KEGG	Glucagon signaling pathway	Glucagon signaling pathway	4	1.41756e-07	2.6443e-07	4.12511e-05
KEGG	N-Glycan biosynthesis	N-Glycan biosynthesis	3	1.8045e-07	3.34465e-07	5.2511e-05
KEGG	Primary immunodeficiency	Primary immunodeficiency	3	1.8045e-07	3.32348e-07	5.2511e-05
KEGG	Longevity regulating pathway	Longevity regulating pathway	5	1.85273e-07	3.39085e-07	5.39145e-05
KEGG	Cytosolic DNA-sensing pathway	Cytosolic DNA-sensing pathway	1	1.87388e-07	3.40812e-07	5.453e-05
KEGG	Alanine, aspartate and glutamate metabolism	Alanine, aspartate and glutamate metabolism	1	1.87388e-07	3.38696e-07	5.453e-05
KEGG	Intestinal immune network for IgA production	Intestinal immune network for IgA production	2	2.04037e-07	3.66511e-07	5.93748e-05
KEGG	Amino sugar and nucleotide sugar metabolism	Amino sugar and nucleotide sugar metabolism	2	2.04037e-07	3.64262e-07	5.93748e-05
KEGG	Endocrine resistance	Endocrine resistance	7	2.54492e-07	4.51568e-07	7.40571e-05
KEGG	Prolactin signaling pathway	Prolactin signaling pathway	4	2.58056e-07	4.55116e-07	7.50942e-05
KEGG	GnRH secretion	GnRH secretion	1	3.64512e-07	6.38995e-07	0.000106073
KEGG	Tryptophan metabolism	Tryptophan metabolism	1	3.64512e-07	6.35168e-07	0.000106073
KEGG	African trypanosomiasis	African trypanosomiasis	1	3.64512e-07	6.31387e-07	0.000106073
KEGG	Arginine and proline metabolism	Arginine and proline metabolism	2	3.86208e-07	6.65009e-07	0.000112387
KEGG	Pancreatic cancer	Pancreatic cancer	7	4.41976e-07	7.5656e-07	0.000128615
KEGG	ErbB signaling pathway	ErbB signaling pathway	7	4.41976e-07	7.52135e-07	0.000128615
KEGG	Adherens junction	Adherens junction	8	4.74299e-07	8.02448e-07	0.000138021
KEGG	Parathyroid hormone synthesis, secretion and action	Parathyroid hormone synthesis, secretion and action	9	4.91337e-07	8.26468e-07	0.000142979
KEGG	Homologous recombination	Homologous recombination	3	6.17411e-07	1.03257e-06	0.000179667
KEGG	Cortisol synthesis and secretion	Cortisol synthesis and secretion	3	6.17411e-07	1.02667e-06	0.000179667
KEGG	DNA replication	DNA replication	3	6.17411e-07	1.02083e-06	0.000179667
KEGG	Melanogenesis	Melanogenesis	3	6.17411e-07	1.01507e-06	0.000179667
KEGG	Chronic myeloid leukemia	Chronic myeloid leukemia	6	6.91092e-07	1.12982e-06	0.000201108
KEGG	Estrogen signaling pathway	Estrogen signaling pathway	6	6.91092e-07	1.12351e-06	0.000201108
KEGG	Non-small cell lung cancer	Non-small cell lung cancer	6	6.91092e-07	1.11726e-06	0.000201108
KEGG	Long-term potentiation	Long-term potentiation	1	7.07829e-07	1.138e-06	0.000205978
KEGG	Breast cancer	Breast cancer	11	8.06552e-07	1.2896e-06	0.000234707
KEGG	Inflammatory mediator regulation of TRP channels	Inflammatory mediator regulation of TRP channels	5	1.04889e-06	1.66791e-06	0.000305228
KEGG	Thyroid hormone synthesis	Thyroid hormone synthesis	3	1.13685e-06	1.79795e-06	0.000330823
KEGG	JAK-STAT signaling pathway	JAK-STAT signaling pathway	3	1.13685e-06	1.78823e-06	0.000330823
KEGG	Cholesterol metabolism	Cholesterol metabolism	6	1.20791e-06	1.8898e-06	0.000351503
KEGG	Retrograde endocannabinoid signaling	Retrograde endocannabinoid signaling	1	1.37197e-06	2.13499e-06	0.000399243
KEGG	SNARE interactions in vesicular transport	SNARE interactions in vesicular transport	1	1.37197e-06	2.12363e-06	0.000399243
KEGG	Protein digestion and absorption	Protein digestion and absorption	1	1.37197e-06	2.1124e-06	0.000399243
KEGG	Hedgehog signaling pathway	Hedgehog signaling pathway	1	1.37197e-06	2.10128e-06	0.000399243
KEGG	Inositol phosphate metabolism	Inositol phosphate metabolism	2	1.37317e-06	2.0921e-06	0.000399591
KEGG	Glycolysis / Gluconeogenesis	Glycolysis / Gluconeogenesis	2	1.37317e-06	2.0812e-06	0.000399591
KEGG	Ovarian steroidogenesis	Ovarian steroidogenesis	2	1.37317e-06	2.07042e-06	0.000399591
KEGG	Glioma	Glioma	4	1.52642e-06	2.28962e-06	0.000444187
KEGG	Serotonergic synapse	Serotonergic synapse	4	1.52642e-06	2.27788e-06	0.000444187
KEGG	Viral myocarditis	Viral myocarditis	3	2.08647e-06	3.09777e-06	0.000607164
KEGG	Glycerophospholipid metabolism	Glycerophospholipid metabolism	3	2.08647e-06	3.08205e-06	0.000607164
KEGG	Platinum drug resistance	Platinum drug resistance	6	2.10288e-06	3.0906e-06	0.000611939
KEGG	Tyrosine metabolism	Tyrosine metabolism	1	2.65404e-06	3.88104e-06	0.000772327
KEGG	Gap junction	Gap junction	4	2.74094e-06	3.98806e-06	0.000797613
KEGG	Central carbon metabolism in cancer	Central carbon metabolism in cancer	4	2.74094e-06	3.96822e-06	0.000797613
KEGG	EGFR tyrosine kinase inhibitor resistance	EGFR tyrosine kinase inhibitor resistance	9	3.90795e-06	5.62976e-06	0.00113721
KEGG	Longevity regulating pathway - multiple species	Longevity regulating pathway - multiple species	2	4.82763e-06	6.9204e-06	0.00140484
KEGG	Arachidonic acid metabolism	Arachidonic acid metabolism	2	4.82763e-06	6.88647e-06	0.00140484
KEGG	Basal transcription factors	Basal transcription factors	4	4.90276e-06	6.95953e-06	0.0014267
KEGG	Renin-angiotensin system	Renin-angiotensin system	1	5.12342e-06	7.23745e-06	0.00149092
KEGG	Circadian entrainment	Circadian entrainment	3	6.95419e-06	9.77618e-06	0.00202367
KEGG	Sphingolipid metabolism	Sphingolipid metabolism	2	9.00958e-06	1.26048e-05	0.00262179
KEGG	Antigen processing and presentation	Antigen processing and presentation	2	9.00958e-06	1.25444e-05	0.00262179
KEGG	Ferroptosis	Ferroptosis	3	1.26235e-05	1.74926e-05	0.00367345
KEGG	Gastric acid secretion	Gastric acid secretion	3	1.26235e-05	1.74097e-05	0.00367345
KEGG	Notch signaling pathway	Notch signaling pathway	2	1.67569e-05	2.30012e-05	0.00487625
KEGG	Various types of N-glycan biosynthesis	Various types of N-glycan biosynthesis	1	1.89606e-05	2.59039e-05	0.00551754
KEGG	Thyroid cancer	Thyroid cancer	1	1.89606e-05	2.57829e-05	0.00551754
KEGG	Regulation of lipolysis in adipocytes	Regulation of lipolysis in adipocytes	3	2.28202e-05	3.08868e-05	0.00664067
KEGG	Melanoma	Melanoma	3	2.28202e-05	3.07438e-05	0.00664067
KEGG	Phosphatidylinositol signaling system	Phosphatidylinositol signaling system	4	2.73515e-05	3.66788e-05	0.00795929
KEGG	Steroid hormone biosynthesis	Steroid hormone biosynthesis	4	2.73515e-05	3.65105e-05	0.00795929
KEGG	Epithelial cell signaling in Helicobacter pylori infection	Epithelial cell signaling in Helicobacter pylori infection	5	3.01879e-05	4.01127e-05	0.00878468
KEGG	Antifolate resistance	Antifolate resistance	2	3.10519e-05	4.10732e-05	0.0090361
KEGG	Alcoholism	Alcoholism	6	3.14723e-05	4.14409e-05	0.00915843
KEGG	Chemical carcinogenesis	Chemical carcinogenesis	1	3.63353e-05	4.76287e-05	0.0105736
KEGG	Folate biosynthesis	Folate biosynthesis	1	3.63353e-05	4.74152e-05	0.0105736
KEGG	Aldosterone-regulated sodium reabsorption	Aldosterone-regulated sodium reabsorption	1	3.63353e-05	4.72035e-05	0.0105736
KEGG	RNA polymerase	RNA polymerase	3	4.10712e-05	5.31188e-05	0.0119517
KEGG	GABAergic synapse	GABAergic synapse	3	4.10712e-05	5.28838e-05	0.0119517
KEGG	Cocaine addiction	Cocaine addiction	3	4.10712e-05	5.26508e-05	0.0119517
KEGG	Synaptic vesicle cycle	Synaptic vesicle cycle	1	6.94324e-05	8.86177e-05	0.0202048
KEGG	Fatty acid degradation	Fatty acid degradation	1	6.94324e-05	8.82308e-05	0.0202048
KEGG	Cardiac muscle contraction	Cardiac muscle contraction	1	6.94324e-05	8.78471e-05	0.0202048
KEGG	Porphyrin and chlorophyll metabolism	Porphyrin and chlorophyll metabolism	1	6.94324e-05	8.74668e-05	0.0202048
KEGG	Long-term depression	Long-term depression	3	7.35702e-05	9.22798e-05	0.0214089
KEGG	Small cell lung cancer	Small cell lung cancer	9	7.61951e-05	9.51621e-05	0.0221728
KEGG	Drug metabolism - other enzymes	Drug metabolism - other enzymes	4	8.4e-05	0.000104461	0.024444
KEGG	VEGF signaling pathway	VEGF signaling pathway	4	8.4e-05	0.000104017	0.024444
KEGG	Protein export	Protein export	2	0.00010534	0.000129889	0.0306538
KEGG	Base excision repair	Base excision repair	3	0.000131117	0.000160992	0.0381551
KEGG	Allograft rejection	Allograft rejection	1	0.000132262	0.000161715	0.0384883
KEGG	Vasopressin-regulated water reabsorption	Vasopressin-regulated water reabsorption	1	0.000132262	0.000161039	0.0384883
KEGG	Pyrimidine metabolism	Pyrimidine metabolism	4	0.000146015	0.000177043	0.0424903
KEGG	Bladder cancer	Bladder cancer	5	0.000151584	0.000183034	0.0441111
KEGG	Autoimmune thyroid disease	Autoimmune thyroid disease	2	0.000192708	0.000231727	0.0560779
KEGG	Glycosaminoglycan biosynthesis - heparan sulfate / heparin	Glycosaminoglycan biosynthesis - heparan sulfate / heparin	1	0.000251079	0.000300674	0.0730639
KEGG	Fructose and mannose metabolism	Fructose and mannose metabolism	1	0.000251079	0.000299442	0.0730639
KEGG	Terpenoid backbone biosynthesis	Terpenoid backbone biosynthesis	1	0.000251079	0.00029822	0.0730639
KEGG	Citrate cycle (TCA cycle)	Citrate cycle (TCA cycle)	1	0.000251079	0.000297008	0.0730639
KEGG	Retinol metabolism	Retinol metabolism	2	0.000350758	0.000413241	0.102071
KEGG	Glyoxylate and dicarboxylate metabolism	Glyoxylate and dicarboxylate metabolism	2	0.000350758	0.000411575	0.102071
KEGG	Propanoate metabolism	Propanoate metabolism	2	0.000350758	0.000409922	0.102071
KEGG	Endocrine and other factor-regulated calcium reabsorption	Endocrine and other factor-regulated calcium reabsorption	3	0.000409495	0.000476653	0.119163
KEGG	Type II diabetes mellitus	Type II diabetes mellitus	3	0.000409495	0.000474754	0.119163
KEGG	Amphetamine addiction	Amphetamine addiction	5	0.000431283	0.000498029	0.125503
KEGG	Glycosylphosphatidylinositol (GPI)-anchor biosynthesis	Glycosylphosphatidylinositol (GPI)-anchor biosynthesis	4	0.000433238	0.00049831	0.126072
KEGG	Mannose type O-glycan biosynthesis	Mannose type O-glycan biosynthesis	1	0.000474814	0.000543979	0.138171
KEGG	Asthma	Asthma	1	0.000474814	0.000541846	0.138171
KEGG	Aminoacyl-tRNA biosynthesis	Aminoacyl-tRNA biosynthesis	1	0.000474814	0.00053973	0.138171
KEGG	Pyruvate metabolism	Pyruvate metabolism	3	0.000716917	0.000811762	0.208623
KEGG	Other types of O-glycan biosynthesis	Other types of O-glycan biosynthesis	1	0.000894091	0.00100845	0.26018
KEGG	Glycosaminoglycan degradation	Glycosaminoglycan degradation	1	0.000894091	0.00100456	0.26018
KEGG	Olfactory transduction	Olfactory transduction	2	0.0011422	0.00127839	0.332381
KEGG	Vibrio cholerae infection	Vibrio cholerae infection	2	0.0011422	0.00127349	0.332381
KEGG	Morphine addiction	Morphine addiction	2	0.0011422	0.00126863	0.332381
KEGG	Maturity onset diabetes of the young	Maturity onset diabetes of the young	5	0.00119312	0.00132014	0.347198
KEGG	Circadian rhythm	Circadian rhythm	1	0.00167552	0.00184688	0.487577
KEGG	Nicotinate and nicotinamide metabolism	Nicotinate and nicotinamide metabolism	2	0.00204096	0.0022412	0.593919
KEGG	Hippo signaling pathway - multiple species	Hippo signaling pathway - multiple species	2	0.00204096	0.00223278	0.593919
KEGG	Glycerolipid metabolism	Glycerolipid metabolism	2	0.00204096	0.00222442	0.593919
KEGG	Apoptosis - multiple species	Apoptosis - multiple species	4	0.00210031	0.00228057	0.611191
KEGG	Glutathione metabolism	Glutathione metabolism	4	0.00210031	0.00227209	0.611191
KEGG	Pentose and glucuronate interconversions	Pentose and glucuronate interconversions	1	0.00312279	0.00336568	0.908733
KEGG	Arginine biosynthesis	Arginine biosynthesis	1	0.00312279	0.00335326	0.908733
KEGG	Histidine metabolism	Histidine metabolism	2	0.00361939	0.00387222	1
KEGG	Steroid biosynthesis	Steroid biosynthesis	3	0.00367872	0.00392128	1
KEGG	beta-Alanine metabolism	beta-Alanine metabolism	3	0.00367872	0.00390696	1

## Sheet: GSE41011_COAD_Inters
53 common elements in "coad" and "gse41":
Metabolic pathways
Pathways in cancer
Transcriptional misregulation in cancer
MAPK signaling pathway
Salmonella infection
Neuroactive ligand-receptor interaction
Herpes simplex virus 1 infection
Proteoglycans in cancer
Epstein-Barr virus infection
Human papillomavirus infection
RNA transport
MicroRNAs in cancer
Tuberculosis
Apoptosis
Human cytomegalovirus infection
Endocytosis
Measles
Kaposi sarcoma-associated herpesvirus infection
Autophagy - animal
Human T-cell leukemia virus 1 infection
Hepatitis C
Viral carcinogenesis
TNF signaling pathway
Oxidative phosphorylation
Neurotrophin signaling pathway
Cushing syndrome
Leukocyte transendothelial migration
Toll-like receptor signaling pathway
Hepatitis B
Focal adhesion
Lysosome
Parkinson disease
Chemokine signaling pathway
Hepatocellular carcinoma
mRNA surveillance pathway
Colorectal cancer
Mitophagy - animal
Gastric cancer
p53 signaling pathway
Prostate cancer
Endocrine resistance
Pancreatic cancer
Adherens junction
Chronic myeloid leukemia
JAK-STAT signaling pathway
Platinum drug resistance
Thyroid cancer
Epithelial cell signaling in Helicobacter pylori infection
RNA polymerase
Porphyrin and chlorophyll metabolism
Small cell lung cancer
Base excision repair
Pyruvate metabolism

## Sheet: GSE63678_Enrich
Pathway Source	PathwayID	PathwayName	ProteinsIntersection	Pvalue	FDRCorrection	BonferroniCorrection
KEGG	Metabolic pathways	Metabolic pathways	48	1.17994e-199	3.20943e-197	3.20943e-197
KEGG	Cytokine-cytokine receptor interaction	Cytokine-cytokine receptor interaction	3	3.13643e-84	4.26555e-82	8.53109e-82
KEGG	Pathways in cancer	Pathways in cancer	15	1.11786e-49	1.01353e-47	3.04059e-47
KEGG	Neuroactive ligand-receptor interaction	Neuroactive ligand-receptor interaction	3	5.60253e-36	3.80972e-34	1.52389e-33
KEGG	Pathways of neurodegeneration - multiple diseases	Pathways of neurodegeneration - multiple diseases	16	2.09123e-33	1.13763e-31	5.68815e-31
KEGG	Transcriptional misregulation in cancer	Transcriptional misregulation in cancer	11	7.9112e-33	3.58641e-31	2.15185e-30
KEGG	MAPK signaling pathway	MAPK signaling pathway	3	4.40938e-31	1.71336e-29	1.19935e-28
KEGG	NOD-like receptor signaling pathway	NOD-like receptor signaling pathway	4	2.63982e-28	8.97538e-27	7.1803e-26
KEGG	Shigellosis	Shigellosis	8	9.47509e-28	2.86358e-26	2.57722e-25
KEGG	Proteoglycans in cancer	Proteoglycans in cancer	7	1.94421e-27	5.28825e-26	5.28825e-25
KEGG	Salmonella infection	Salmonella infection	10	3.06284e-27	7.57357e-26	8.33093e-25
KEGG	MicroRNAs in cancer	MicroRNAs in cancer	10	1.22516e-26	2.77703e-25	3.33244e-24
KEGG	Endocytosis	Endocytosis	5	4.66726e-25	9.76534e-24	1.26949e-22
KEGG	Ribosome	Ribosome	9	9.07707e-25	1.76354e-23	2.46896e-22
KEGG	Viral protein interaction with cytokine and cytokine receptor	Viral protein interaction with cytokine and cytokine receptor	1	1.79943e-23	3.26297e-22	4.89445e-21
KEGG	TNF signaling pathway	TNF signaling pathway	1	3.74791e-23	6.37145e-22	1.01943e-20
KEGG	Yersinia infection	Yersinia infection	2	9.03745e-23	1.44599e-21	2.45819e-20
KEGG	Axon guidance	Axon guidance	5	2.64835e-22	4.00196e-21	7.20352e-20
KEGG	Human papillomavirus infection	Human papillomavirus infection	12	3.60457e-22	5.16022e-21	9.80442e-20
KEGG	Cell adhesion molecules	Cell adhesion molecules	5	1.06812e-21	1.45265e-20	2.90529e-19
KEGG	NF-kappa B signaling pathway	NF-kappa B signaling pathway	4	1.82181e-21	2.35968e-20	4.95533e-19
KEGG	Viral carcinogenesis	Viral carcinogenesis	7	8.33983e-21	1.03111e-19	2.26843e-18
KEGG	Human cytomegalovirus infection	Human cytomegalovirus infection	9	1.17637e-20	1.39118e-19	3.19972e-18
KEGG	Protein processing in endoplasmic reticulum	Protein processing in endoplasmic reticulum	4	1.48889e-20	1.68741e-19	4.04978e-18
KEGG	Ubiquitin mediated proteolysis	Ubiquitin mediated proteolysis	9	4.4352e-20	4.8255e-19	1.20637e-17
KEGG	Kaposi sarcoma-associated herpesvirus infection	Kaposi sarcoma-associated herpesvirus infection	10	6.61074e-20	6.91585e-19	1.79812e-17
KEGG	cAMP signaling pathway	cAMP signaling pathway	4	1.20232e-19	1.21122e-18	3.27031e-17
KEGG	Epstein-Barr virus infection	Epstein-Barr virus infection	11	1.786e-19	1.73498e-18	4.85793e-17
KEGG	Tuberculosis	Tuberculosis	8	2.06664e-19	1.93837e-18	5.62127e-17
KEGG	Cushing syndrome	Cushing syndrome	2	4.91744e-19	4.45848e-18	1.33754e-16
KEGG	Human T-cell leukemia virus 1 infection	Human T-cell leukemia virus 1 infection	13	1.09493e-18	9.60712e-18	2.97821e-16
KEGG	Complement and coagulation cascades	Complement and coagulation cascades	1	4.14248e-18	3.52111e-17	1.12675e-15
KEGG	Fluid shear stress and atherosclerosis	Fluid shear stress and atherosclerosis	3	6.162e-18	5.07898e-17	1.67606e-15
KEGG	Influenza A	Influenza A	10	6.2074e-18	4.96592e-17	1.68841e-15
KEGG	Human immunodeficiency virus 1 infection	Human immunodeficiency virus 1 infection	9	8.36315e-18	6.49936e-17	2.27478e-15
KEGG	Herpes simplex virus 1 infection	Herpes simplex virus 1 infection	11	8.38071e-18	6.33209e-17	2.27955e-15
KEGG	Th17 cell differentiation	Th17 cell differentiation	1	8.49081e-18	6.24189e-17	2.3095e-15
KEGG	Wnt signaling pathway	Wnt signaling pathway	4	1.49831e-17	1.07247e-16	4.0754e-15
KEGG	Rap1 signaling pathway	Rap1 signaling pathway	4	1.49831e-17	1.04497e-16	4.0754e-15
KEGG	Amyotrophic lateral sclerosis	Amyotrophic lateral sclerosis	15	1.88818e-17	1.28396e-16	5.13584e-15
KEGG	Regulation of actin cytoskeleton	Regulation of actin cytoskeleton	3	2.47038e-17	1.63889e-16	6.71944e-15
KEGG	RNA transport	RNA transport	11	2.97706e-17	1.928e-16	8.09761e-15
KEGG	Pathogenic Escherichia coli infection	Pathogenic Escherichia coli infection	9	3.04365e-17	1.92529e-16	8.27873e-15
KEGG	Hepatitis B	Hepatitis B	10	4.22905e-17	2.61432e-16	1.1503e-14
KEGG	Lysosome	Lysosome	2	6.89073e-17	4.16506e-16	1.87428e-14
KEGG	Ras signaling pathway	Ras signaling pathway	3	9.84996e-17	5.82433e-16	2.67919e-14
KEGG	Spliceosome	Spliceosome	4	1.15933e-16	6.70931e-16	3.15338e-14
KEGG	Platelet activation	Platelet activation	3	7.75993e-16	4.39729e-15	2.1107e-13
KEGG	Toll-like receptor signaling pathway	Toll-like receptor signaling pathway	3	7.75993e-16	4.30755e-15	2.1107e-13
KEGG	FoxO signaling pathway	FoxO signaling pathway	5	8.82811e-16	4.80249e-15	2.40125e-13
KEGG	Hepatocellular carcinoma	Hepatocellular carcinoma	5	8.82811e-16	4.70833e-15	2.40125e-13
KEGG	Apoptosis	Apoptosis	8	9.98935e-16	5.2252e-15	2.7171e-13
KEGG	T cell receptor signaling pathway	T cell receptor signaling pathway	3	1.5396e-15	7.90137e-15	4.18773e-13
KEGG	Alzheimer disease	Alzheimer disease	18	2.8665e-15	1.44387e-14	7.79688e-13
KEGG	Autophagy - animal	Autophagy - animal	12	2.87513e-15	1.42188e-14	7.82036e-13
KEGG	PI3K-Akt signaling pathway	PI3K-Akt signaling pathway	8	3.58162e-15	1.73965e-14	9.74202e-13
KEGG	cGMP-PKG signaling pathway	cGMP-PKG signaling pathway	3	6.03355e-15	2.87917e-14	1.64113e-12
KEGG	Osteoclast differentiation	Osteoclast differentiation	4	6.65406e-15	3.12052e-14	1.8099e-12
KEGG	Focal adhesion	Focal adhesion	3	1.19169e-14	5.4939e-14	3.2414e-12
KEGG	Hepatitis C	Hepatitis C	8	1.27375e-14	5.77434e-14	3.4646e-12
KEGG	Gastric cancer	Gastric cancer	4	1.29938e-14	5.79395e-14	3.53431e-12
KEGG	Measles	Measles	7	1.67498e-14	7.34832e-14	4.55596e-12
KEGG	Chagas disease	Chagas disease	2	1.8168e-14	7.84397e-14	4.9417e-12
KEGG	TGF-beta signaling pathway	TGF-beta signaling pathway	2	1.8168e-14	7.72141e-14	4.9417e-12
KEGG	Ribosome biogenesis in eukaryotes	Ribosome biogenesis in eukaryotes	2	1.8168e-14	7.60262e-14	4.9417e-12
KEGG	Thermogenesis	Thermogenesis	1	2.13011e-14	8.77866e-14	5.79391e-12
KEGG	Phagosome	Phagosome	3	2.35007e-14	9.54058e-14	6.39219e-12
KEGG	Relaxin signaling pathway	Relaxin signaling pathway	2	3.62542e-14	1.45017e-13	9.86114e-12
KEGG	Neurotrophin signaling pathway	Neurotrophin signaling pathway	7	5.99242e-14	2.36223e-13	1.62994e-11
KEGG	Oxytocin signaling pathway	Oxytocin signaling pathway	2	7.22446e-14	2.80722e-13	1.96505e-11
KEGG	RNA degradation	RNA degradation	3	1.78509e-13	6.83867e-13	4.85545e-11
KEGG	Necroptosis	Necroptosis	5	3.27263e-13	1.23633e-12	8.90154e-11
KEGG	Sphingolipid signaling pathway	Sphingolipid signaling pathway	3	3.49748e-13	1.30317e-12	9.51313e-11
KEGG	Tight junction	Tight junction	10	4.69774e-13	1.72674e-12	1.27779e-10
KEGG	Breast cancer	Breast cancer	4	6.94232e-13	2.51775e-12	1.88831e-10
KEGG	ABC transporters	ABC transporters	1	7.16032e-13	2.56264e-12	1.94761e-10
KEGG	RIG-I-like receptor signaling pathway	RIG-I-like receptor signaling pathway	2	1.12292e-12	3.96669e-12	3.05435e-10
KEGG	Th1 and Th2 cell differentiation	Th1 and Th2 cell differentiation	2	1.12292e-12	3.91584e-12	3.05435e-10
KEGG	mTOR signaling pathway	mTOR signaling pathway	7	1.39702e-12	4.81e-12	3.7999e-10
KEGG	Vascular smooth muscle contraction	Vascular smooth muscle contraction	1	1.44123e-12	4.9002e-12	3.92016e-10
KEGG	Peroxisome	Peroxisome	6	1.83876e-12	6.17459e-12	5.00142e-10
KEGG	Mitophagy - animal	Mitophagy - animal	2	2.22134e-12	7.36835e-12	6.04204e-10
KEGG	Thyroid hormone signaling pathway	Thyroid hormone signaling pathway	5	2.26998e-12	7.43896e-12	6.17434e-10
KEGG	Leukocyte transendothelial migration	Leukocyte transendothelial migration	4	2.57585e-12	8.34083e-12	7.0063e-10
KEGG	ErbB signaling pathway	ErbB signaling pathway	2	4.38737e-12	1.40396e-11	1.19336e-09
KEGG	Signaling pathways regulating pluripotency of stem cells	Signaling pathways regulating pluripotency of stem cells	7	4.84522e-12	1.53244e-11	1.3179e-09
KEGG	C-type lectin receptor signaling pathway	C-type lectin receptor signaling pathway	7	4.84522e-12	1.51483e-11	1.3179e-09
KEGG	Insulin resistance	Insulin resistance	4	4.94686e-12	1.52903e-11	1.34554e-09
KEGG	PD-L1 expression and PD-1 checkpoint pathway in cancer	PD-L1 expression and PD-1 checkpoint pathway in cancer	3	5.06491e-12	1.54793e-11	1.37766e-09
KEGG	Phospholipase D signaling pathway	Phospholipase D signaling pathway	3	5.06491e-12	1.53073e-11	1.37766e-09
KEGG	Huntington disease	Huntington disease	10	5.16093e-12	1.54261e-11	1.40377e-09
KEGG	AGE-RAGE signaling pathway in diabetic complications	AGE-RAGE signaling pathway in diabetic complications	4	9.48084e-12	2.80303e-11	2.57879e-09
KEGG	Apelin signaling pathway	Apelin signaling pathway	4	9.48084e-12	2.77289e-11	2.57879e-09
KEGG	ECM-receptor interaction	ECM-receptor interaction	3	9.83565e-12	2.84606e-11	2.6753e-09
KEGG	Oxidative phosphorylation	Oxidative phosphorylation	12	1.1746e-11	3.36305e-11	3.1949e-09
KEGG	HIF-1 signaling pathway	HIF-1 signaling pathway	6	2.26782e-11	6.42548e-11	6.16846e-09
KEGG	Chemokine signaling pathway	Chemokine signaling pathway	4	3.46036e-11	9.70327e-11	9.41217e-09
KEGG	Calcium signaling pathway	Calcium signaling pathway	3	3.68777e-11	1.02355e-10	1.00307e-08
KEGG	Legionellosis	Legionellosis	2	6.56881e-11	1.80476e-10	1.78672e-08
KEGG	Inflammatory bowel disease	Inflammatory bowel disease	2	6.56881e-11	1.78672e-10	1.78672e-08
KEGG	Toxoplasmosis	Toxoplasmosis	4	6.58918e-11	1.77451e-10	1.79226e-08
KEGG	Spinocerebellar ataxia	Spinocerebellar ataxia	8	7.116e-11	1.8976e-10	1.93555e-08
KEGG	Prostate cancer	Prostate cancer	4	1.25186e-10	3.30589e-10	3.40507e-08
KEGG	Leishmaniasis	Leishmaniasis	2	1.28662e-10	3.36501e-10	3.49961e-08
KEGG	Aldosterone synthesis and secretion	Aldosterone synthesis and secretion	1	1.86304e-10	4.82615e-10	5.06746e-08
KEGG	Cellular senescence	Cellular senescence	13	2.09111e-10	5.36587e-10	5.68783e-08
KEGG	GnRH signaling pathway	GnRH signaling pathway	2	2.51554e-10	6.39464e-10	6.84227e-08
KEGG	Adrenergic signaling in cardiomyocytes	Adrenergic signaling in cardiomyocytes	2	2.51554e-10	6.33543e-10	6.84227e-08
KEGG	Fc gamma R-mediated phagocytosis	Fc gamma R-mediated phagocytosis	3	2.63709e-10	6.58062e-10	7.17287e-08
KEGG	Non-alcoholic fatty liver disease	Non-alcoholic fatty liver disease	6	2.689e-10	6.64917e-10	7.31409e-08
KEGG	Colorectal cancer	Colorectal cancer	6	2.689e-10	6.58927e-10	7.31409e-08
KEGG	Adipocytokine signaling pathway	Adipocytokine signaling pathway	1	3.7116e-10	9.01388e-10	1.00955e-07
KEGG	Alcoholism	Alcoholism	1	3.7116e-10	8.93411e-10	1.00955e-07
KEGG	Renal cell carcinoma	Renal cell carcinoma	2	4.90915e-10	1.17131e-09	1.33529e-07
KEGG	Amoebiasis	Amoebiasis	2	4.90915e-10	1.16112e-09	1.33529e-07
KEGG	Serotonergic synapse	Serotonergic synapse	1	7.38384e-10	1.73138e-09	2.00841e-07
KEGG	Primary immunodeficiency	Primary immunodeficiency	1	7.38384e-10	1.71659e-09	2.00841e-07
KEGG	Hippo signaling pathway	Hippo signaling pathway	9	8.76374e-10	2.02012e-09	2.38374e-07
KEGG	Acute myeloid leukemia	Acute myeloid leukemia	3	9.68314e-10	2.21329e-09	2.63381e-07
KEGG	Rheumatoid arthritis	Rheumatoid arthritis	3	9.68314e-10	2.19485e-09	2.63381e-07
KEGG	Renin secretion	Renin secretion	1	1.46679e-09	3.29725e-09	3.98968e-07
KEGG	B cell receptor signaling pathway	B cell receptor signaling pathway	3	1.84915e-09	4.12269e-09	5.02968e-07
KEGG	Glutamatergic synapse	Glutamatergic synapse	2	1.85883e-09	4.11058e-09	5.05601e-07
KEGG	Fc epsilon RI signaling pathway	Fc epsilon RI signaling pathway	2	1.85883e-09	4.07743e-09	5.05601e-07
KEGG	Insulin signaling pathway	Insulin signaling pathway	9	2.76291e-09	6.01209e-09	7.51511e-07
KEGG	Cortisol synthesis and secretion	Cortisol synthesis and secretion	1	2.90939e-09	6.28058e-09	7.91353e-07
KEGG	Endocrine resistance	Endocrine resistance	5	4.26625e-09	9.13716e-09	1.16042e-06
KEGG	Thyroid hormone synthesis	Thyroid hormone synthesis	1	5.76182e-09	1.22439e-08	1.56721e-06
KEGG	mRNA surveillance pathway	mRNA surveillance pathway	7	6.76695e-09	1.42683e-08	1.84061e-06
KEGG	Bacterial invasion of epithelial cells	Bacterial invasion of epithelial cells	2	6.9812e-09	1.46068e-08	1.89889e-06
KEGG	PPAR signaling pathway	PPAR signaling pathway	5	7.85924e-09	1.63184e-08	2.13771e-06
KEGG	Adherens junction	Adherens junction	6	1.01034e-08	2.08192e-08	2.74813e-06
KEGG	Estrogen signaling pathway	Estrogen signaling pathway	4	1.04373e-08	2.13454e-08	2.83894e-06
KEGG	Non-small cell lung cancer	Non-small cell lung cancer	4	1.04373e-08	2.11861e-08	2.83894e-06
KEGG	Glycerophospholipid metabolism	Glycerophospholipid metabolism	1	1.13925e-08	2.29539e-08	3.09877e-06
KEGG	Glucagon signaling pathway	Glucagon signaling pathway	3	1.26903e-08	2.53806e-08	3.45177e-06
KEGG	Inflammatory mediator regulation of TRP channels	Inflammatory mediator regulation of TRP channels	3	1.26903e-08	2.51954e-08	3.45177e-06
KEGG	EGFR tyrosine kinase inhibitor resistance	EGFR tyrosine kinase inhibitor resistance	6	1.82928e-08	3.60554e-08	4.97565e-06
KEGG	Cholesterol metabolism	Cholesterol metabolism	4	1.94227e-08	3.8007e-08	5.28297e-06
KEGG	Bladder cancer	Bladder cancer	1	2.24885e-08	4.36918e-08	6.11686e-06
KEGG	Phosphatidylinositol signaling system	Phosphatidylinositol signaling system	1	2.24885e-08	4.3382e-08	6.11686e-06
KEGG	Steroid hormone biosynthesis	Steroid hormone biosynthesis	1	2.24885e-08	4.30765e-08	6.11686e-06
KEGG	Systemic lupus erythematosus	Systemic lupus erythematosus	1	2.24885e-08	4.27752e-08	6.11686e-06
KEGG	Cholinergic synapse	Cholinergic synapse	2	2.59909e-08	4.90939e-08	7.06952e-06
KEGG	Growth hormone synthesis, secretion and action	Growth hormone synthesis, secretion and action	6	3.30102e-08	6.19226e-08	8.97877e-06
KEGG	Circadian entrainment	Circadian entrainment	1	4.43149e-08	8.25592e-08	1.20536e-05
KEGG	Insulin secretion	Insulin secretion	3	4.52319e-08	8.36944e-08	1.23031e-05
KEGG	Parkinson disease	Parkinson disease	11	4.78334e-08	8.79101e-08	1.30107e-05
KEGG	Fanconi anemia pathway	Fanconi anemia pathway	5	4.82262e-08	8.80371e-08	1.31175e-05
KEGG	Melanogenesis	Melanogenesis	2	4.99745e-08	9.06204e-08	1.35931e-05
KEGG	DNA replication	DNA replication	2	4.99745e-08	9.00203e-08	1.35931e-05
KEGG	Pancreatic cancer	Pancreatic cancer	6	5.93637e-08	1.0623e-07	1.61469e-05
KEGG	Cell cycle	Cell cycle	16	6.10465e-08	1.08527e-07	1.66046e-05
KEGG	Dopaminergic synapse	Dopaminergic synapse	4	6.66501e-08	1.1772e-07	1.81288e-05
KEGG	p53 signaling pathway	p53 signaling pathway	10	8.17449e-08	1.43449e-07	2.22346e-05
KEGG	Nucleotide excision repair	Nucleotide excision repair	1	8.71687e-08	1.51986e-07	2.37099e-05
KEGG	Gastric acid secretion	Gastric acid secretion	1	8.71687e-08	1.51018e-07	2.37099e-05
KEGG	Ferroptosis	Ferroptosis	1	8.71687e-08	1.50063e-07	2.37099e-05
KEGG	Chronic myeloid leukemia	Chronic myeloid leukemia	5	8.77118e-08	1.50048e-07	2.38576e-05
KEGG	Purine metabolism	Purine metabolism	6	1.06377e-07	1.80841e-07	2.89346e-05
KEGG	Prion disease	Prion disease	10	1.40005e-07	2.36531e-07	3.80815e-05
KEGG	N-Glycan biosynthesis	N-Glycan biosynthesis	3	1.59381e-07	2.67603e-07	4.33517e-05
KEGG	Amino sugar and nucleotide sugar metabolism	Amino sugar and nucleotide sugar metabolism	2	1.83379e-07	3.06007e-07	4.98791e-05
KEGG	Intestinal immune network for IgA production	Intestinal immune network for IgA production	2	1.83379e-07	3.04141e-07	4.98791e-05
KEGG	Taste transduction	Taste transduction	2	1.83379e-07	3.02298e-07	4.98791e-05
KEGG	Valine, leucine and isoleucine degradation	Valine, leucine and isoleucine degradation	2	1.83379e-07	3.00477e-07	4.98791e-05
KEGG	Platinum drug resistance	Platinum drug resistance	5	2.87075e-07	4.67572e-07	7.80845e-05
KEGG	Central carbon metabolism in cancer	Central carbon metabolism in cancer	3	2.97805e-07	4.82161e-07	8.1003e-05
KEGG	RNA polymerase	RNA polymerase	1	3.35358e-07	5.39747e-07	9.12173e-05
KEGG	Cocaine addiction	Cocaine addiction	1	3.35358e-07	5.36572e-07	9.12173e-05
KEGG	Tryptophan metabolism	Tryptophan metabolism	1	3.35358e-07	5.33435e-07	9.12173e-05
KEGG	Mineral absorption	Mineral absorption	2	3.49885e-07	5.53306e-07	9.51687e-05
KEGG	AMPK signaling pathway	AMPK signaling pathway	11	3.94233e-07	6.19835e-07	0.000107231
KEGG	Choline metabolism in cancer	Choline metabolism in cancer	4	4.13395e-07	6.46227e-07	0.000112443
KEGG	Homologous recombination	Homologous recombination	3	5.54642e-07	8.62072e-07	0.000150863
KEGG	Small cell lung cancer	Small cell lung cancer	6	5.98395e-07	9.24793e-07	0.000162764
KEGG	Long-term depression	Long-term depression	1	6.55793e-07	1.00777e-06	0.000178376
KEGG	Glycosylphosphatidylinositol (GPI)-anchor biosynthesis	Glycosylphosphatidylinositol (GPI)-anchor biosynthesis	1	6.55793e-07	1.00211e-06	0.000178376
KEGG	Glycine, serine and threonine metabolism	Glycine, serine and threonine metabolism	2	6.65695e-07	1.01156e-06	0.000181069
KEGG	Longevity regulating pathway	Longevity regulating pathway	6	1.05571e-06	1.59529e-06	0.000287153
KEGG	Proteasome	Proteasome	7	1.14048e-06	1.71387e-06	0.000310211
KEGG	Amphetamine addiction	Amphetamine addiction	2	1.26281e-06	1.88728e-06	0.000343484
KEGG	Inositol phosphate metabolism	Inositol phosphate metabolism	2	1.26281e-06	1.87696e-06	0.000343484
KEGG	Arrhythmogenic right ventricular cardiomyopathy	Arrhythmogenic right ventricular cardiomyopathy	2	1.26281e-06	1.86676e-06	0.000343484
KEGG	Ovarian steroidogenesis	Ovarian steroidogenesis	2	1.26281e-06	1.85667e-06	0.000343484
KEGG	Retrograde endocannabinoid signaling	Retrograde endocannabinoid signaling	1	1.27964e-06	1.87131e-06	0.000348063
KEGG	Hedgehog signaling pathway	Hedgehog signaling pathway	1	1.27964e-06	1.8613e-06	0.000348063
KEGG	Protein digestion and absorption	Protein digestion and absorption	1	1.27964e-06	1.8514e-06	0.000348063
KEGG	Glioma	Glioma	4	1.37059e-06	1.97249e-06	0.000372801
KEGG	Prolactin signaling pathway	Prolactin signaling pathway	5	1.65168e-06	2.36451e-06	0.000449257
KEGG	Carbon metabolism	Carbon metabolism	11	1.83415e-06	2.61198e-06	0.000498888
KEGG	Regulation of lipolysis in adipocytes	Regulation of lipolysis in adipocytes	2	2.38804e-06	3.38306e-06	0.000649548
KEGG	Gap junction	Gap junction	4	2.48092e-06	3.49642e-06	0.000674809
KEGG	Basal cell carcinoma	Basal cell carcinoma	1	2.49128e-06	3.49292e-06	0.000677627
KEGG	Fatty acid metabolism	Fatty acid metabolism	3	3.50799e-06	4.89319e-06	0.000954173
KEGG	Longevity regulating pathway - multiple species	Longevity regulating pathway - multiple species	2	4.50102e-06	6.24631e-06	0.00122428
KEGG	African trypanosomiasis	African trypanosomiasis	2	4.50102e-06	6.21461e-06	0.00122428
KEGG	GABAergic synapse	GABAergic synapse	2	4.50102e-06	6.18322e-06	0.00122428
KEGG	Renin-angiotensin system	Renin-angiotensin system	1	4.83847e-06	6.61338e-06	0.00131606
KEGG	Autophagy - other	Autophagy - other	1	4.83847e-06	6.58031e-06	0.00131606
KEGG	Type II diabetes mellitus	Type II diabetes mellitus	1	4.83847e-06	6.54757e-06	0.00131606
KEGG	Endometrial cancer	Endometrial cancer	5	5.19243e-06	6.99179e-06	0.00141234
KEGG	Biosynthesis of amino acids	Biosynthesis of amino acids	6	5.64573e-06	7.56472e-06	0.00153564
KEGG	JAK-STAT signaling pathway	JAK-STAT signaling pathway	4	8.02527e-06	1.07004e-05	0.00218287
KEGG	Long-term potentiation	Long-term potentiation	2	8.45391e-06	1.12169e-05	0.00229946
KEGG	Antigen processing and presentation	Antigen processing and presentation	2	8.45391e-06	1.11624e-05	0.00229946
KEGG	Glycosphingolipid biosynthesis - lacto and neolacto series	Glycosphingolipid biosynthesis - lacto and neolacto series	1	9.37302e-06	1.23162e-05	0.00254946
KEGG	Protein export	Protein export	1	9.37302e-06	1.2257e-05	0.00254946
KEGG	Viral myocarditis	Viral myocarditis	4	1.43353e-05	1.86565e-05	0.00389921
KEGG	Base excision repair	Base excision repair	2	1.58192e-05	2.04897e-05	0.00430283
KEGG	Various types of N-glycan biosynthesis	Various types of N-glycan biosynthesis	1	1.81076e-05	2.33425e-05	0.00492528
KEGG	Cysteine and methionine metabolism	Cysteine and methionine metabolism	4	2.54815e-05	3.26933e-05	0.00693098
KEGG	Tyrosine metabolism	Tyrosine metabolism	2	2.9484e-05	3.76509e-05	0.00801963
KEGG	Aldosterone-regulated sodium reabsorption	Aldosterone-regulated sodium reabsorption	1	3.48793e-05	4.43325e-05	0.00948716
KEGG	Metabolism of xenobiotics by cytochrome P450	Metabolism of xenobiotics by cytochrome P450	1	3.48793e-05	4.41263e-05	0.00948716
KEGG	Folate biosynthesis	Folate biosynthesis	1	3.48793e-05	4.3922e-05	0.00948716
KEGG	Lysine degradation	Lysine degradation	1	3.48793e-05	4.37196e-05	0.00948716
KEGG	Oocyte meiosis	Oocyte meiosis	10	3.87545e-05	4.83543e-05	0.0105412
KEGG	Cardiac muscle contraction	Cardiac muscle contraction	1	6.69723e-05	8.31802e-05	0.0182165
KEGG	Steroid biosynthesis	Steroid biosynthesis	1	6.69723e-05	8.28021e-05	0.0182165
KEGG	beta-Alanine metabolism	beta-Alanine metabolism	1	6.69723e-05	8.24275e-05	0.0182165
KEGG	Fatty acid degradation	Fatty acid degradation	1	6.69723e-05	8.20562e-05	0.0182165
KEGG	Drug metabolism - other enzymes	Drug metabolism - other enzymes	4	7.92439e-05	9.66563e-05	0.0215544
KEGG	VEGF signaling pathway	VEGF signaling pathway	4	7.92439e-05	9.62248e-05	0.0215544
KEGG	SNARE interactions in vesicular transport	SNARE interactions in vesicular transport	3	0.000125137	0.000151277	0.0340372
KEGG	Primary bile acid biosynthesis	Primary bile acid biosynthesis	1	0.000128153	0.000154237	0.0348576
KEGG	Morphine addiction	Morphine addiction	1	0.000128153	0.000153558	0.0348576
KEGG	Pyrimidine metabolism	Pyrimidine metabolism	4	0.000138548	0.000165286	0.0376851
KEGG	Melanoma	Melanoma	4	0.000138548	0.000164564	0.0376851
KEGG	Thyroid cancer	Thyroid cancer	2	0.000185824	0.000219757	0.0505441
KEGG	Antifolate resistance	Antifolate resistance	3	0.000222949	0.00026252	0.0606422
KEGG	GnRH secretion	GnRH secretion	4	0.000240729	0.000282234	0.0654783
KEGG	Glycerolipid metabolism	Glycerolipid metabolism	1	0.000244305	0.000285197	0.0664508
KEGG	Starch and sucrose metabolism	Starch and sucrose metabolism	1	0.000244305	0.000283978	0.0664508
KEGG	Biosynthesis of unsaturated fatty acids	Biosynthesis of unsaturated fatty acids	1	0.000244305	0.000282769	0.0664508
KEGG	Terpenoid backbone biosynthesis	Terpenoid backbone biosynthesis	1	0.000244305	0.000281571	0.0664508
KEGG	Propanoate metabolism	Propanoate metabolism	2	0.000339763	0.000389939	0.0924156
KEGG	Progesterone-mediated oocyte maturation	Progesterone-mediated oocyte maturation	7	0.000360904	0.000412462	0.098166
KEGG	Histidine metabolism	Histidine metabolism	1	0.00046381	0.000527851	0.126156
KEGG	Carbohydrate digestion and absorption	Carbohydrate digestion and absorption	2	0.000617599	0.000699946	0.167987
KEGG	Pyruvate metabolism	Pyruvate metabolism	3	0.000694248	0.00078355	0.188835
KEGG	Butanoate metabolism	Butanoate metabolism	1	0.000876519	0.000985178	0.238413
KEGG	Olfactory transduction	Olfactory transduction	2	0.00111544	0.00124856	0.3034
KEGG	Pentose phosphate pathway	Pentose phosphate pathway	3	0.00121209	0.00135118	0.329688
KEGG	Ether lipid metabolism	Ether lipid metabolism	1	0.00164801	0.00182963	0.44826
KEGG	Mismatch repair	Mismatch repair	1	0.00164801	0.00182219	0.44826
KEGG	Non-homologous end-joining	Non-homologous end-joining	1	0.00164801	0.00181482	0.44826
KEGG	Fructose and mannose metabolism	Fructose and mannose metabolism	2	0.00200035	0.00219393	0.544095
KEGG	Glutathione metabolism	Glutathione metabolism	4	0.00204199	0.00223061	0.555421
KEGG	Apoptosis - multiple species	Apoptosis - multiple species	4	0.00204199	0.00222168	0.555421
KEGG	Pentose and glucuronate interconversions	Pentose and glucuronate interconversions	1	0.00308072	0.00333847	0.837957
KEGG	Proximal tubule bicarbonate reclamation	Proximal tubule bicarbonate reclamation	1	0.00308072	0.00332523	0.837957

## Sheet: UCEC_Enrich
Pathway Source	PathwayID	PathwayName	ProteinsIntersection	Pvalue	FDRCorrection	BonferroniCorrection
KEGG	Metabolic pathways	Metabolic pathways	78	3.58652e-107	1.0903e-104	1.0903e-104
KEGG	Cytokine-cytokine receptor interaction	Cytokine-cytokine receptor interaction	32	1.5408e-40	2.34202e-38	4.68403e-38
KEGG	Pathways of neurodegeneration - multiple diseases	Pathways of neurodegeneration - multiple diseases	13	1.59587e-34	1.61715e-32	4.85144e-32
KEGG	Pathways in cancer	Pathways in cancer	27	1.30757e-33	9.93751e-32	3.97501e-31
KEGG	Neuroactive ligand-receptor interaction	Neuroactive ligand-receptor interaction	11	2.05321e-24	1.24835e-22	6.24177e-22
KEGG	Transcriptional misregulation in cancer	Transcriptional misregulation in cancer	18	4.09556e-24	2.07509e-22	1.24505e-21
KEGG	Amyotrophic lateral sclerosis	Amyotrophic lateral sclerosis	9	2.14377e-22	9.31009e-21	6.51706e-20
KEGG	Proteoglycans in cancer	Proteoglycans in cancer	11	5.73249e-22	2.17835e-20	1.74268e-19
KEGG	Alzheimer disease	Alzheimer disease	10	1.26224e-21	4.26357e-20	3.83721e-19
KEGG	Shigellosis	Shigellosis	13	2.31173e-21	7.02766e-20	7.02766e-19
KEGG	Epstein-Barr virus infection	Epstein-Barr virus infection	9	9.46737e-21	2.61644e-19	2.87808e-18
KEGG	Ubiquitin mediated proteolysis	Ubiquitin mediated proteolysis	8	1.96093e-20	4.96769e-19	5.96123e-18
KEGG	Kaposi sarcoma-associated herpesvirus infection	Kaposi sarcoma-associated herpesvirus infection	9	3.31816e-20	7.7594e-19	1.00872e-17
KEGG	NF-kappa B signaling pathway	NF-kappa B signaling pathway	5	1.26085e-19	2.73784e-18	3.83298e-17
KEGG	Salmonella infection	Salmonella infection	17	2.32768e-19	4.71743e-18	7.07615e-17
KEGG	Herpes simplex virus 1 infection	Herpes simplex virus 1 infection	9	4.02141e-19	7.64068e-18	1.22251e-16
KEGG	Tuberculosis	Tuberculosis	8	8.60578e-19	1.53892e-17	2.61616e-16
KEGG	Protein processing in endoplasmic reticulum	Protein processing in endoplasmic reticulum	5	8.91784e-19	1.50612e-17	2.71102e-16
KEGG	RNA transport	RNA transport	9	1.39017e-18	2.22427e-17	4.22611e-16
KEGG	Hepatitis B	Hepatitis B	8	1.60988e-18	2.44702e-17	4.89405e-16
KEGG	Autophagy - animal	Autophagy - animal	8	1.60988e-18	2.3305e-17	4.89405e-16
KEGG	MAPK signaling pathway	MAPK signaling pathway	13	1.71876e-18	2.37501e-17	5.22502e-16
KEGG	NOD-like receptor signaling pathway	NOD-like receptor signaling pathway	12	2.32461e-18	3.07253e-17	7.06683e-16
KEGG	MicroRNAs in cancer	MicroRNAs in cancer	18	4.81593e-18	6.10017e-17	1.46404e-15
KEGG	Cell cycle	Cell cycle	4	5.40418e-18	6.57148e-17	1.64287e-15
KEGG	Pathogenic Escherichia coli infection	Pathogenic Escherichia coli infection	8	1.0464e-17	1.22348e-16	3.18105e-15
KEGG	Human cytomegalovirus infection	Human cytomegalovirus infection	12	4.56532e-17	5.14022e-16	1.38786e-14
KEGG	Human papillomavirus infection	Human papillomavirus infection	17	7.04113e-17	7.64465e-16	2.1405e-14
KEGG	Huntington disease	Huntington disease	5	1.57289e-16	1.64883e-15	4.7816e-14
KEGG	Influenza A	Influenza A	11	2.03305e-16	2.06016e-15	6.18047e-14
KEGG	Human immunodeficiency virus 1 infection	Human immunodeficiency virus 1 infection	10	2.70006e-16	2.6478e-15	8.20819e-14
KEGG	Human T-cell leukemia virus 1 infection	Human T-cell leukemia virus 1 infection	15	2.82813e-16	2.68672e-15	8.59751e-14
KEGG	Viral protein interaction with cytokine and cytokine receptor	Viral protein interaction with cytokine and cytokine receptor	6	2.9465e-16	2.71435e-15	8.95735e-14
KEGG	Axon guidance	Axon guidance	11	2.16615e-15	1.93679e-14	6.5851e-13
KEGG	Viral carcinogenesis	Viral carcinogenesis	12	2.77304e-15	2.40858e-14	8.43004e-13
KEGG	Hepatitis C	Hepatitis C	7	3.22039e-15	2.71944e-14	9.78998e-13
KEGG	Endocytosis	Endocytosis	14	4.10751e-15	3.37482e-14	1.24868e-12
KEGG	Yersinia infection	Yersinia infection	8	4.92833e-15	3.94266e-14	1.49821e-12
KEGG	Cell adhesion molecules	Cell adhesion molecules	11	7.00396e-15	5.4595e-14	2.1292e-12
KEGG	TNF signaling pathway	TNF signaling pathway	8	5.54978e-14	4.21783e-13	1.68713e-11
KEGG	Rap1 signaling pathway	Rap1 signaling pathway	7	6.94395e-14	5.14868e-13	2.11096e-11
KEGG	Complement and coagulation cascades	Complement and coagulation cascades	4	9.21833e-14	6.67232e-13	2.80237e-11
KEGG	Apoptosis	Apoptosis	10	1.81608e-13	1.28392e-12	5.52087e-11
KEGG	Pertussis	Pertussis	2	2.34314e-13	1.61889e-12	7.12313e-11
KEGG	Cellular senescence	Cellular senescence	9	2.50954e-13	1.69533e-12	7.629e-11
KEGG	mTOR signaling pathway	mTOR signaling pathway	6	2.83309e-13	1.87231e-12	8.61261e-11
KEGG	Toll-like receptor signaling pathway	Toll-like receptor signaling pathway	5	3.2009e-13	2.07037e-12	9.73074e-11
KEGG	Necroptosis	Necroptosis	5	5.98574e-13	3.79097e-12	1.81967e-10
KEGG	Wnt signaling pathway	Wnt signaling pathway	8	6.08751e-13	3.77674e-12	1.8506e-10
KEGG	C-type lectin receptor signaling pathway	C-type lectin receptor signaling pathway	6	9.68779e-13	5.89017e-12	2.94509e-10
KEGG	Neurotrophin signaling pathway	Neurotrophin signaling pathway	8	1.10299e-12	6.57469e-12	3.35309e-10
KEGG	Regulation of actin cytoskeleton	Regulation of actin cytoskeleton	7	1.43891e-12	8.41209e-12	4.37429e-10
KEGG	Spinocerebellar ataxia	Spinocerebellar ataxia	6	1.78699e-12	1.02499e-11	5.43246e-10
KEGG	Hepatocellular carcinoma	Hepatocellular carcinoma	8	1.99482e-12	1.12301e-11	6.06425e-10
KEGG	Th17 cell differentiation	Th17 cell differentiation	5	2.08347e-12	1.15159e-11	6.33376e-10
KEGG	Measles	Measles	9	2.61353e-12	1.41878e-11	7.94514e-10
KEGG	IL-17 signaling pathway	IL-17 signaling pathway	7	2.62457e-12	1.39977e-11	7.97869e-10
KEGG	Spliceosome	Spliceosome	8	3.60093e-12	1.88739e-11	1.09468e-09
KEGG	Ribosome	Ribosome	23	3.71554e-12	1.91445e-11	1.12952e-09
KEGG	cAMP signaling pathway	cAMP signaling pathway	11	3.92327e-12	1.98779e-11	1.19267e-09
KEGG	Colorectal cancer	Colorectal cancer	4	4.20898e-12	2.09759e-11	1.27953e-09
KEGG	Toxoplasmosis	Toxoplasmosis	3	7.77683e-12	3.81316e-11	2.36416e-09
KEGG	Adherens junction	Adherens junction	3	1.48121e-11	7.1474e-11	4.50286e-09
KEGG	AGE-RAGE signaling pathway in diabetic complications	AGE-RAGE signaling pathway in diabetic complications	4	1.48668e-11	7.06171e-11	4.51949e-09
KEGG	ABC transporters	ABC transporters	2	2.42451e-11	1.13393e-10	7.37052e-09
KEGG	Fluid shear stress and atherosclerosis	Fluid shear stress and atherosclerosis	9	2.63737e-11	1.21479e-10	8.0176e-09
KEGG	Oxytocin signaling pathway	Oxytocin signaling pathway	4	2.7873e-11	1.26468e-10	8.47338e-09
KEGG	RIG-I-like receptor signaling pathway	RIG-I-like receptor signaling pathway	3	2.81711e-11	1.25941e-10	8.56401e-09
KEGG	HIF-1 signaling pathway	HIF-1 signaling pathway	6	3.71509e-11	1.63679e-10	1.12939e-08
KEGG	Carbon metabolism	Carbon metabolism	5	4.57346e-11	1.98619e-10	1.39033e-08
KEGG	RNA degradation	RNA degradation	5	4.57346e-11	1.95821e-10	1.39033e-08
KEGG	Cushing syndrome	Cushing syndrome	9	4.67579e-11	1.97422e-10	1.42144e-08
KEGG	T cell receptor signaling pathway	T cell receptor signaling pathway	7	5.14937e-11	2.1444e-10	1.56541e-08
KEGG	Parkinson disease	Parkinson disease	7	5.14937e-11	2.11542e-10	1.56541e-08
KEGG	Mitophagy - animal	Mitophagy - animal	3	5.34992e-11	2.1685e-10	1.62638e-08
KEGG	AMPK signaling pathway	AMPK signaling pathway	6	6.77722e-11	2.71089e-10	2.06027e-08
KEGG	TGF-beta signaling pathway	TGF-beta signaling pathway	5	8.4368e-11	3.33089e-10	2.56479e-08
KEGG	Ribosome biogenesis in eukaryotes	Ribosome biogenesis in eukaryotes	5	8.4368e-11	3.28819e-10	2.56479e-08
KEGG	PD-L1 expression and PD-1 checkpoint pathway in cancer	PD-L1 expression and PD-1 checkpoint pathway in cancer	4	9.74759e-11	3.75097e-10	2.96327e-08
KEGG	Prion disease	Prion disease	6	1.2338e-10	4.68845e-10	3.75076e-08
KEGG	PI3K-Akt signaling pathway	PI3K-Akt signaling pathway	13	1.33259e-10	5.00134e-10	4.05108e-08
KEGG	cGMP-PKG signaling pathway	cGMP-PKG signaling pathway	7	1.66952e-10	6.18945e-10	5.07535e-08
KEGG	ECM-receptor interaction	ECM-receptor interaction	4	1.818e-10	6.6587e-10	5.52672e-08
KEGG	Thermogenesis	Thermogenesis	4	1.818e-10	6.57943e-10	5.52672e-08
KEGG	Gastric cancer	Gastric cancer	8	2.12402e-10	7.59651e-10	6.45703e-08
KEGG	Hematopoietic cell lineage	Hematopoietic cell lineage	9	2.57032e-10	9.08579e-10	7.81378e-08
KEGG	Signaling pathways regulating pluripotency of stem cells	Signaling pathways regulating pluripotency of stem cells	9	4.51476e-10	1.57757e-09	1.37249e-07
KEGG	Chagas disease	Chagas disease	6	7.34888e-10	2.5387e-09	2.23406e-07
KEGG	Osteoclast differentiation	Osteoclast differentiation	9	7.91045e-10	2.702e-09	2.40478e-07
KEGG	PPAR signaling pathway	PPAR signaling pathway	4	1.16603e-09	3.9386e-09	3.54474e-07
KEGG	Legionellosis	Legionellosis	3	1.28986e-09	4.30897e-09	3.92117e-07
KEGG	Inflammatory bowel disease	Inflammatory bowel disease	3	1.28986e-09	4.26214e-09	3.92117e-07
KEGG	Peroxisome	Peroxisome	9	1.38247e-09	4.51905e-09	4.20272e-07
KEGG	Ras signaling pathway	Ras signaling pathway	10	1.55981e-09	5.04448e-09	4.74181e-07
KEGG	Thyroid hormone signaling pathway	Thyroid hormone signaling pathway	8	2.076e-09	6.64319e-09	6.31103e-07
KEGG	Focal adhesion	Focal adhesion	8	2.076e-09	6.57399e-09	6.31103e-07
KEGG	Parathyroid hormone synthesis, secretion and action	Parathyroid hormone synthesis, secretion and action	6	2.38719e-09	7.48149e-09	7.25704e-07
KEGG	Leishmaniasis	Leishmaniasis	3	2.42484e-09	7.52197e-09	7.37153e-07
KEGG	FoxO signaling pathway	FoxO signaling pathway	12	3.07171e-09	9.43233e-09	9.338e-07
KEGG	Phagosome	Phagosome	8	3.64726e-09	1.10877e-08	1.10877e-06
KEGG	Chemokine signaling pathway	Chemokine signaling pathway	6	4.28667e-09	1.29025e-08	1.30315e-06
KEGG	Calcium signaling pathway	Calcium signaling pathway	5	5.786e-09	1.72446e-08	1.75894e-06
KEGG	Pancreatic cancer	Pancreatic cancer	5	1.04876e-08	3.09536e-08	3.18822e-06
KEGG	Oocyte meiosis	Oocyte meiosis	5	1.04876e-08	3.0656e-08	3.18822e-06
KEGG	Rheumatoid arthritis	Rheumatoid arthritis	4	1.3491e-08	3.90596e-08	4.10126e-06
KEGG	Oxidative phosphorylation	Oxidative phosphorylation	16	1.37078e-08	3.93129e-08	4.16717e-06
KEGG	Bile secretion	Bile secretion	6	1.37151e-08	3.89663e-08	4.16939e-06
KEGG	Biosynthesis of amino acids	Biosynthesis of amino acids	3	1.59196e-08	4.48107e-08	4.83956e-06
KEGG	Purine metabolism	Purine metabolism	5	1.89605e-08	5.28807e-08	5.764e-06
KEGG	Leukocyte transendothelial migration	Leukocyte transendothelial migration	8	1.94511e-08	5.37557e-08	5.91313e-06
KEGG	p53 signaling pathway	p53 signaling pathway	9	2.16298e-08	5.92385e-08	6.57547e-06
KEGG	Tight junction	Tight junction	16	2.23583e-08	6.06868e-08	6.79692e-06
KEGG	Th1 and Th2 cell differentiation	Th1 and Th2 cell differentiation	6	2.44321e-08	6.57287e-08	7.42734e-06
KEGG	Hippo signaling pathway	Hippo signaling pathway	11	4.08972e-08	1.09059e-07	1.24328e-05
KEGG	Glycine, serine and threonine metabolism	Glycine, serine and threonine metabolism	1	5.14348e-08	1.35967e-07	1.56362e-05
KEGG	Phospholipase D signaling pathway	Phospholipase D signaling pathway	7	5.16637e-08	1.35395e-07	1.57058e-05
KEGG	Relaxin signaling pathway	Relaxin signaling pathway	8	5.84988e-08	1.51997e-07	1.77836e-05
KEGG	Apelin signaling pathway	Apelin signaling pathway	8	5.84988e-08	1.50709e-07	1.77836e-05
KEGG	mRNA surveillance pathway	mRNA surveillance pathway	8	5.84988e-08	1.49442e-07	1.77836e-05
KEGG	Epithelial cell signaling in Helicobacter pylori infection	Epithelial cell signaling in Helicobacter pylori infection	2	5.94289e-08	1.50553e-07	1.80664e-05
KEGG	DNA replication	DNA replication	2	5.94289e-08	1.49309e-07	1.80664e-05
KEGG	Basal transcription factors	Basal transcription factors	2	5.94289e-08	1.48085e-07	1.80664e-05
KEGG	Fanconi anemia pathway	Fanconi anemia pathway	5	6.1469e-08	1.51923e-07	1.86866e-05
KEGG	Lysosome	Lysosome	11	6.87123e-08	1.68456e-07	2.08886e-05
KEGG	Nucleotide excision repair	Nucleotide excision repair	1	1.00053e-07	2.4333e-07	3.04163e-05
KEGG	Adipocytokine signaling pathway	Adipocytokine signaling pathway	3	1.02463e-07	2.47212e-07	3.11487e-05
KEGG	Insulin signaling pathway	Insulin signaling pathway	11	1.15059e-07	2.75416e-07	3.49778e-05
KEGG	Insulin resistance	Insulin resistance	9	1.84815e-07	4.38937e-07	5.61839e-05
KEGG	Platelet activation	Platelet activation	12	1.89245e-07	4.45972e-07	5.75303e-05
KEGG	Primary immunodeficiency	Primary immunodeficiency	3	1.8966e-07	4.43513e-07	5.76567e-05
KEGG	Breast cancer	Breast cancer	10	1.90754e-07	4.42665e-07	5.79891e-05
KEGG	Alanine, aspartate and glutamate metabolism	Alanine, aspartate and glutamate metabolism	1	1.94351e-07	4.47596e-07	5.90827e-05
KEGG	Longevity regulating pathway	Longevity regulating pathway	5	1.96968e-07	4.50214e-07	5.98784e-05
KEGG	Valine, leucine and isoleucine degradation	Valine, leucine and isoleucine degradation	2	2.12975e-07	4.83167e-07	6.47443e-05
KEGG	Staphylococcus aureus infection	Staphylococcus aureus infection	2	2.12975e-07	4.79588e-07	6.47443e-05
KEGG	Gap junction	Gap junction	3	3.5013e-07	7.82643e-07	0.000106439
KEGG	Platinum drug resistance	Platinum drug resistance	5	3.50935e-07	7.78718e-07	0.000106684
KEGG	Systemic lupus erythematosus	Systemic lupus erythematosus	2	4.01844e-07	8.85222e-07	0.000122161
KEGG	Arginine and proline metabolism	Arginine and proline metabolism	2	4.01844e-07	8.78853e-07	0.000122161
KEGG	Steroid hormone biosynthesis	Steroid hormone biosynthesis	2	4.01844e-07	8.72576e-07	0.000122161
KEGG	Vascular smooth muscle contraction	Vascular smooth muscle contraction	6	4.18839e-07	9.03029e-07	0.000127327
KEGG	Hypertrophic cardiomyopathy	Hypertrophic cardiomyopathy	4	4.9226e-07	1.05385e-06	0.000149647
KEGG	Prostate cancer	Prostate cancer	8	5.08593e-07	1.0812e-06	0.000154612
KEGG	Melanogenesis	Melanogenesis	3	6.44555e-07	1.36073e-06	0.000195945
KEGG	Acute myeloid leukemia	Acute myeloid leukemia	6	7.32033e-07	1.53474e-06	0.000222538
KEGG	Chronic myeloid leukemia	Chronic myeloid leukemia	6	7.32033e-07	1.52423e-06	0.000222538
KEGG	Non-small cell lung cancer	Non-small cell lung cancer	6	7.32033e-07	1.51386e-06	0.000222538
KEGG	EGFR tyrosine kinase inhibitor resistance	EGFR tyrosine kinase inhibitor resistance	8	8.65521e-07	1.77783e-06	0.000263118
KEGG	Bacterial invasion of epithelial cells	Bacterial invasion of epithelial cells	4	8.87242e-07	1.81021e-06	0.000269721
KEGG	Sphingolipid signaling pathway	Sphingolipid signaling pathway	10	8.91512e-07	1.8068e-06	0.00027102
KEGG	Glucagon signaling pathway	Glucagon signaling pathway	5	1.10278e-06	2.22018e-06	0.000335246
KEGG	Proteasome	Proteasome	7	1.39618e-06	2.79236e-06	0.000424439
KEGG	Glycolysis / Gluconeogenesis	Glycolysis / Gluconeogenesis	2	1.42022e-06	2.82187e-06	0.000431746
KEGG	Glioma	Glioma	4	1.59377e-06	3.14614e-06	0.000484505
KEGG	N-Glycan biosynthesis	N-Glycan biosynthesis	4	1.59377e-06	3.12584e-06	0.000484505
KEGG	Natural killer cell mediated cytotoxicity	Natural killer cell mediated cytotoxicity	15	1.73588e-06	3.38274e-06	0.000527708
KEGG	Prolactin signaling pathway	Prolactin signaling pathway	5	1.94438e-06	3.76491e-06	0.000591092
KEGG	Viral myocarditis	Viral myocarditis	3	2.16462e-06	4.16485e-06	0.000658046
KEGG	GnRH signaling pathway	GnRH signaling pathway	6	2.21128e-06	4.22787e-06	0.000672231
KEGG	Non-alcoholic fatty liver disease	Non-alcoholic fatty liver disease	11	2.34902e-06	4.46314e-06	0.000714102
KEGG	ErbB signaling pathway	ErbB signaling pathway	8	2.47729e-06	4.67761e-06	0.000753095
KEGG	Cytosolic DNA-sensing pathway	Cytosolic DNA-sensing pathway	2	2.65944e-06	4.99055e-06	0.000808469
KEGG	Antifolate resistance	Antifolate resistance	1	2.72261e-06	5.07774e-06	0.000827672
KEGG	Tyrosine metabolism	Tyrosine metabolism	1	2.72261e-06	5.04678e-06	0.000827672
KEGG	Progesterone-mediated oocyte maturation	Progesterone-mediated oocyte maturation	4	2.85275e-06	5.25597e-06	0.000867236
KEGG	Salivary secretion	Salivary secretion	5	3.41513e-06	6.25421e-06	0.0010382
KEGG	Amoebiasis	Amoebiasis	6	3.82053e-06	6.95474e-06	0.00116144
KEGG	Renal cell carcinoma	Renal cell carcinoma	6	3.82053e-06	6.91334e-06	0.00116144
KEGG	Cysteine and methionine metabolism	Cysteine and methionine metabolism	3	3.94745e-06	7.10074e-06	0.00120003
KEGG	Fatty acid metabolism	Fatty acid metabolism	3	3.94745e-06	7.05898e-06	0.00120003
KEGG	Phosphatidylinositol signaling system	Phosphatidylinositol signaling system	3	3.94745e-06	7.0177e-06	0.00120003
KEGG	Bladder cancer	Bladder cancer	3	3.94745e-06	6.97689e-06	0.00120003
KEGG	Pancreatic secretion	Pancreatic secretion	7	4.06579e-06	7.14451e-06	0.001236
KEGG	GABAergic synapse	GABAergic synapse	2	4.96569e-06	8.67568e-06	0.00150957
KEGG	Homologous recombination	Homologous recombination	4	5.08713e-06	8.83707e-06	0.00154649
KEGG	Vitamin digestion and absorption	Vitamin digestion and absorption	1	5.243e-06	9.05609e-06	0.00159387
KEGG	Inflammatory mediator regulation of TRP channels	Inflammatory mediator regulation of TRP channels	6	6.57316e-06	1.12895e-05	0.00199824
KEGG	Growth hormone synthesis, secretion and action	Growth hormone synthesis, secretion and action	9	6.85414e-06	1.17059e-05	0.00208366
KEGG	B cell receptor signaling pathway	B cell receptor signaling pathway	7	6.89402e-06	1.17083e-05	0.00209578
KEGG	Long-term potentiation	Long-term potentiation	2	9.24352e-06	1.56113e-05	0.00281003
KEGG	Pyruvate metabolism	Pyruvate metabolism	1	1.00751e-05	1.69217e-05	0.00306283
KEGG	Fc epsilon RI signaling pathway	Fc epsilon RI signaling pathway	6	1.12591e-05	1.88064e-05	0.00342277
KEGG	Ovarian steroidogenesis	Ovarian steroidogenesis	3	1.29862e-05	2.15728e-05	0.00394782
KEGG	Glycerophospholipid metabolism	Glycerophospholipid metabolism	4	1.59816e-05	2.64043e-05	0.00485839
KEGG	Base excision repair	Base excision repair	2	1.71501e-05	2.81818e-05	0.00521363
KEGG	Hedgehog signaling pathway	Hedgehog signaling pathway	2	1.71501e-05	2.80303e-05	0.00521363
KEGG	Retrograde endocannabinoid signaling	Retrograde endocannabinoid signaling	2	1.71501e-05	2.78804e-05	0.00521363
KEGG	Cholinergic synapse	Cholinergic synapse	5	1.80465e-05	2.91817e-05	0.00548615
KEGG	Choline metabolism in cancer	Choline metabolism in cancer	6	1.91962e-05	3.08764e-05	0.00583564
KEGG	Aldosterone synthesis and secretion	Aldosterone synthesis and secretion	6	1.91962e-05	3.07139e-05	0.00583564
KEGG	Estrogen signaling pathway	Estrogen signaling pathway	8	1.92675e-05	3.06666e-05	0.00585733
KEGG	Small cell lung cancer	Small cell lung cancer	8	1.92675e-05	3.05069e-05	0.00585733
KEGG	Thyroid cancer	Thyroid cancer	1	1.93161e-05	3.04253e-05	0.00587209
KEGG	Dopaminergic synapse	Dopaminergic synapse	7	1.95498e-05	3.06348e-05	0.00594314
KEGG	Melanoma	Melanoma	3	2.34157e-05	3.65045e-05	0.00711837
KEGG	Endocrine resistance	Endocrine resistance	10	2.81533e-05	4.36663e-05	0.0085586
KEGG	Malaria	Malaria	5	3.11473e-05	4.80649e-05	0.00946878
KEGG	Cholesterol metabolism	Cholesterol metabolism	8	3.1794e-05	4.88151e-05	0.00966538
KEGG	Endometrial cancer	Endometrial cancer	6	3.25688e-05	4.97533e-05	0.00990091
KEGG	Dilated cardiomyopathy	Dilated cardiomyopathy	6	3.25688e-05	4.95046e-05	0.00990091
KEGG	Aldosterone-regulated sodium reabsorption	Aldosterone-regulated sodium reabsorption	1	3.69402e-05	5.58698e-05	0.0112298
KEGG	Longevity regulating pathway - multiple species	Longevity regulating pathway - multiple species	3	4.20402e-05	6.32685e-05	0.0127802
KEGG	Arachidonic acid metabolism	Arachidonic acid metabolism	3	4.20402e-05	6.29568e-05	0.0127802
KEGG	Circadian entrainment	Circadian entrainment	4	4.93174e-05	7.34925e-05	0.0149925
KEGG	Adrenergic signaling in cardiomyocytes	Adrenergic signaling in cardiomyocytes	8	5.21907e-05	7.73949e-05	0.015866
KEGG	Thyroid hormone synthesis	Thyroid hormone synthesis	5	5.34895e-05	7.8936e-05	0.0162608
KEGG	Glutamatergic synapse	Glutamatergic synapse	7	5.43462e-05	7.98128e-05	0.0165212
KEGG	Serotonergic synapse	Serotonergic synapse	6	5.49727e-05	8.03448e-05	0.0167117
KEGG	Apoptosis - multiple species	Apoptosis - multiple species	2	5.83963e-05	8.494e-05	0.0177525
KEGG	Long-term depression	Long-term depression	3	7.51316e-05	0.000108762	0.02284
KEGG	VEGF signaling pathway	VEGF signaling pathway	4	8.59924e-05	0.000123894	0.0261417
KEGG	Ferroptosis	Ferroptosis	4	8.59924e-05	0.00012331	0.0261417
KEGG	Inositol phosphate metabolism	Inositol phosphate metabolism	4	8.59924e-05	0.000122731	0.0261417
KEGG	Arrhythmogenic right ventricular cardiomyopathy	Arrhythmogenic right ventricular cardiomyopathy	4	8.59924e-05	0.000122157	0.0261417
KEGG	Taste transduction	Taste transduction	5	9.13706e-05	0.000129194	0.0277767
KEGG	Amino sugar and nucleotide sugar metabolism	Amino sugar and nucleotide sugar metabolism	5	9.13706e-05	0.000128596	0.0277767
KEGG	Protein export	Protein export	2	0.000107105	0.000150046	0.03256
KEGG	Alcoholism	Alcoholism	7	0.000147789	0.000206091	0.0449279
KEGG	Mineral absorption	Mineral absorption	5	0.000155199	0.000215436	0.0471804
KEGG	Type I diabetes mellitus	Type I diabetes mellitus	2	0.000195557	0.000270225	0.0594494
KEGG	Pentose phosphate pathway	Pentose phosphate pathway	2	0.000195557	0.000269002	0.0594494
KEGG	Autoimmune thyroid disease	Autoimmune thyroid disease	2	0.000195557	0.00026779	0.0594494
KEGG	Drug metabolism - cytochrome P450	Drug metabolism - cytochrome P450	1	0.00025387	0.000346082	0.0771764
KEGG	Glycosaminoglycan biosynthesis - heparan sulfate / heparin	Glycosaminoglycan biosynthesis - heparan sulfate / heparin	1	0.00025387	0.000344537	0.0771764
KEGG	Citrate cycle (TCA cycle)	Citrate cycle (TCA cycle)	1	0.00025387	0.000343006	0.0771764
KEGG	Biosynthesis of unsaturated fatty acids	Biosynthesis of unsaturated fatty acids	1	0.00025387	0.000341488	0.0771764
KEGG	Tryptophan metabolism	Tryptophan metabolism	4	0.000257134	0.000344356	0.0781688
KEGG	Maturity onset diabetes of the young	Maturity onset diabetes of the young	4	0.000257134	0.000342845	0.0781688
KEGG	Retinol metabolism	Retinol metabolism	2	0.000355297	0.00047166	0.10801
KEGG	Chemical carcinogenesis	Chemical carcinogenesis	2	0.000355297	0.00046961	0.10801
KEGG	Insulin secretion	Insulin secretion	8	0.00035771	0.000470753	0.108744
KEGG	Central carbon metabolism in cancer	Central carbon metabolism in cancer	7	0.00039219	0.000513904	0.119226
KEGG	Glutathione metabolism	Glutathione metabolism	3	0.000415596	0.000542236	0.126341
KEGG	Sphingolipid metabolism	Sphingolipid metabolism	4	0.000440599	0.000572402	0.133942
KEGG	Antigen processing and presentation	Antigen processing and presentation	4	0.000440599	0.000569966	0.133942
KEGG	Aminoacyl-tRNA biosynthesis	Aminoacyl-tRNA biosynthesis	1	0.000479337	0.000617451	0.145718
KEGG	Asthma	Asthma	1	0.000479337	0.000614846	0.145718
KEGG	Histidine metabolism	Histidine metabolism	1	0.000479337	0.000612262	0.145718
KEGG	Cortisol synthesis and secretion	Cortisol synthesis and secretion	7	0.000632494	0.000804511	0.192278
KEGG	Fatty acid degradation	Fatty acid degradation	2	0.000642022	0.000813228	0.195175
KEGG	beta-Alanine metabolism	beta-Alanine metabolism	2	0.000642022	0.000809854	0.195175
KEGG	Cardiac muscle contraction	Cardiac muscle contraction	2	0.000642022	0.000806507	0.195175
KEGG	Porphyrin and chlorophyll metabolism	Porphyrin and chlorophyll metabolism	2	0.000642022	0.000803188	0.195175
KEGG	Pyrimidine metabolism	Pyrimidine metabolism	5	0.000732346	0.000912431	0.222633
KEGG	SNARE interactions in vesicular transport	SNARE interactions in vesicular transport	4	0.000749911	0.000930502	0.227973
KEGG	Protein digestion and absorption	Protein digestion and absorption	4	0.000749911	0.00092672	0.227973
KEGG	Glycosaminoglycan degradation	Glycosaminoglycan degradation	1	0.000901299	0.00110929	0.273995
KEGG	Butanoate metabolism	Butanoate metabolism	1	0.000901299	0.00110482	0.273995
KEGG	Graft-versus-host disease	Graft-versus-host disease	1	0.000901299	0.00110038	0.273995
KEGG	One carbon pool by folate	One carbon pool by folate	1	0.000901299	0.00109598	0.273995
KEGG	JAK-STAT signaling pathway	JAK-STAT signaling pathway	7	0.00101268	0.00122651	0.307854
KEGG	Allograft rejection	Allograft rejection	2	0.0011532	0.00139116	0.350572
KEGG	Galactose metabolism	Galactose metabolism	2	0.0011532	0.00138566	0.350572
KEGG	Olfactory transduction	Olfactory transduction	2	0.0011532	0.0013802	0.350572
KEGG	Vibrio cholerae infection	Vibrio cholerae infection	2	0.0011532	0.00137479	0.350572
KEGG	Fc gamma R-mediated phagocytosis	Fc gamma R-mediated phagocytosis	12	0.00116732	0.00138619	0.354864
KEGG	African trypanosomiasis	African trypanosomiasis	5	0.00121115	0.00143264	0.36819
KEGG	GnRH secretion	GnRH secretion	5	0.00121115	0.00142709	0.36819
KEGG	Cocaine addiction	Cocaine addiction	5	0.00121115	0.00142158	0.36819
KEGG	Various types of N-glycan biosynthesis	Various types of N-glycan biosynthesis	3	0.00126049	0.0014738	0.383188
KEGG	Renin secretion	Renin secretion	8	0.00141348	0.00164635	0.429698
KEGG	Ether lipid metabolism	Ether lipid metabolism	1	0.00168679	0.00195719	0.512783
KEGG	Circadian rhythm	Circadian rhythm	1	0.00168679	0.00194975	0.512783
KEGG	Gastric acid secretion	Gastric acid secretion	6	0.00180585	0.00207947	0.548979
KEGG	Drug metabolism - other enzymes	Drug metabolism - other enzymes	6	0.00180585	0.00207162	0.548979
KEGG	Glycosylphosphatidylinositol (GPI)-anchor biosynthesis	Glycosylphosphatidylinositol (GPI)-anchor biosynthesis	5	0.00198716	0.00227104	0.604097
KEGG	Hippo signaling pathway - multiple species	Hippo signaling pathway - multiple species	2	0.00205761	0.00234275	0.625513
KEGG	Glycerolipid metabolism	Glycerolipid metabolism	2	0.00205761	0.002334	0.625513
KEGG	Renin-angiotensin system	Renin-angiotensin system	4	0.0021243	0.0024007	0.645788
KEGG	Regulation of lipolysis in adipocytes	Regulation of lipolysis in adipocytes	6	0.00288697	0.00325051	0.877638
KEGG	Arginine biosynthesis	Arginine biosynthesis	1	0.00313999	0.00352235	0.954557
KEGG	Notch signaling pathway	Notch signaling pathway	5	0.00323259	0.0036129	0.982707
KEGG	Glycosphingolipid biosynthesis - lacto and neolacto series	Glycosphingolipid biosynthesis - lacto and neolacto series	4	0.00353091	0.00393185	1
KEGG	Synaptic vesicle cycle	Synaptic vesicle cycle	3	0.00370907	0.00411518	1
KEGG	Steroid biosynthesis	Steroid biosynthesis	3	0.00370907	0.00410021	1
KEGG	RNA polymerase	RNA polymerase	6	0.00457387	0.00503788	1

## Sheet: GSE63678_UCEC_Inters
233 common elements in "gse" and "ucec":
Metabolic pathways
Cytokine-cytokine receptor interaction
Pathways in cancer
Neuroactive ligand-receptor interaction
Pathways of neurodegeneration - multiple diseases
Transcriptional misregulation in cancer
MAPK signaling pathway
NOD-like receptor signaling pathway
Shigellosis
Proteoglycans in cancer
Salmonella infection
MicroRNAs in cancer
Endocytosis
Ribosome
Viral protein interaction with cytokine and cytokine receptor
TNF signaling pathway
Yersinia infection
Axon guidance
Human papillomavirus infection
Cell adhesion molecules
NF-kappa B signaling pathway
Viral carcinogenesis
Human cytomegalovirus infection
Protein processing in endoplasmic reticulum
Ubiquitin mediated proteolysis
Kaposi sarcoma-associated herpesvirus infection
cAMP signaling pathway
Epstein-Barr virus infection
Tuberculosis
Cushing syndrome
Human T-cell leukemia virus 1 infection
Complement and coagulation cascades
Fluid shear stress and atherosclerosis
Influenza A
Human immunodeficiency virus 1 infection
Herpes simplex virus 1 infection
Th17 cell differentiation
Wnt signaling pathway
Rap1 signaling pathway
Amyotrophic lateral sclerosis
Regulation of actin cytoskeleton
RNA transport
Pathogenic Escherichia coli infection
Hepatitis B
Lysosome
Ras signaling pathway
Spliceosome
Platelet activation
Toll-like receptor signaling pathway
FoxO signaling pathway
Hepatocellular carcinoma
Apoptosis
T cell receptor signaling pathway
Alzheimer disease
Autophagy - animal
PI3K-Akt signaling pathway
cGMP-PKG signaling pathway
Osteoclast differentiation
Focal adhesion
Hepatitis C
Gastric cancer
Measles
Chagas disease
TGF-beta signaling pathway
Ribosome biogenesis in eukaryotes
Thermogenesis
Phagosome
Relaxin signaling pathway
Neurotrophin signaling pathway
Oxytocin signaling pathway
RNA degradation
Necroptosis
Sphingolipid signaling pathway
Tight junction
Breast cancer
ABC transporters
RIG-I-like receptor signaling pathway
Th1 and Th2 cell differentiation
mTOR signaling pathway
Vascular smooth muscle contraction
Peroxisome
Mitophagy - animal
Thyroid hormone signaling pathway
Leukocyte transendothelial migration
ErbB signaling pathway
Signaling pathways regulating pluripotency of stem cells
C-type lectin receptor signaling pathway
Insulin resistance
PD-L1 expression and PD-1 checkpoint pathway in cancer
Phospholipase D signaling pathway
Huntington disease
AGE-RAGE signaling pathway in diabetic complications
Apelin signaling pathway
ECM-receptor interaction
Oxidative phosphorylation
HIF-1 signaling pathway
Chemokine signaling pathway
Calcium signaling pathway
Legionellosis
Inflammatory bowel disease
Toxoplasmosis
Spinocerebellar ataxia
Prostate cancer
Leishmaniasis
Aldosterone synthesis and secretion
Cellular senescence
GnRH signaling pathway
Adrenergic signaling in cardiomyocytes
Fc gamma R-mediated phagocytosis
Non-alcoholic fatty liver disease
Colorectal cancer
Adipocytokine signaling pathway
Alcoholism
Renal cell carcinoma
Amoebiasis
Serotonergic synapse
Primary immunodeficiency
Hippo signaling pathway
Acute myeloid leukemia
Rheumatoid arthritis
Renin secretion
B cell receptor signaling pathway
Glutamatergic synapse
Fc epsilon RI signaling pathway
Insulin signaling pathway
Cortisol synthesis and secretion
Endocrine resistance
Thyroid hormone synthesis
mRNA surveillance pathway
Bacterial invasion of epithelial cells
PPAR signaling pathway
Adherens junction
Estrogen signaling pathway
Non-small cell lung cancer
Glycerophospholipid metabolism
Glucagon signaling pathway
Inflammatory mediator regulation of TRP channels
EGFR tyrosine kinase inhibitor resistance
Cholesterol metabolism
Bladder cancer
Phosphatidylinositol signaling system
Steroid hormone biosynthesis
Systemic lupus erythematosus
Cholinergic synapse
Growth hormone synthesis, secretion and action
Circadian entrainment
Insulin secretion
Parkinson disease
Fanconi anemia pathway
Melanogenesis
DNA replication
Pancreatic cancer
Cell cycle
Dopaminergic synapse
p53 signaling pathway
Nucleotide excision repair
Gastric acid secretion
Ferroptosis
Chronic myeloid leukemia
Purine metabolism
Prion disease
N-Glycan biosynthesis
Amino sugar and nucleotide sugar metabolism
Taste transduction
Valine, leucine and isoleucine degradation
Platinum drug resistance
Central carbon metabolism in cancer
RNA polymerase
Cocaine addiction
Tryptophan metabolism
Mineral absorption
AMPK signaling pathway
Choline metabolism in cancer
Homologous recombination
Small cell lung cancer
Long-term depression
Glycosylphosphatidylinositol (GPI)-anchor biosynthesis
Glycine, serine and threonine metabolism
Longevity regulating pathway
Proteasome
Inositol phosphate metabolism
Arrhythmogenic right ventricular cardiomyopathy
Ovarian steroidogenesis
Retrograde endocannabinoid signaling
Hedgehog signaling pathway
Protein digestion and absorption
Glioma
Prolactin signaling pathway
Carbon metabolism
Regulation of lipolysis in adipocytes
Gap junction
Fatty acid metabolism
Longevity regulating pathway - multiple species
African trypanosomiasis
GABAergic synapse
Renin-angiotensin system
Endometrial cancer
Biosynthesis of amino acids
JAK-STAT signaling pathway
Long-term potentiation
Antigen processing and presentation
Glycosphingolipid biosynthesis - lacto and neolacto series
Protein export
Viral myocarditis
Base excision repair
Various types of N-glycan biosynthesis
Cysteine and methionine metabolism
Tyrosine metabolism
Aldosterone-regulated sodium reabsorption
Oocyte meiosis
Cardiac muscle contraction
Steroid biosynthesis
beta-Alanine metabolism
Fatty acid degradation
Drug metabolism - other enzymes
VEGF signaling pathway
SNARE interactions in vesicular transport
Pyrimidine metabolism
Melanoma
Thyroid cancer
Antifolate resistance
GnRH secretion
Glycerolipid metabolism
Biosynthesis of unsaturated fatty acids
Progesterone-mediated oocyte maturation
Histidine metabolism
Pyruvate metabolism
Butanoate metabolism
Olfactory transduction
Pentose phosphate pathway
Ether lipid metabolism
Glutathione metabolism
Apoptosis - multiple species

## Sheet: GSE65144_Enrich
Pathway Source	PathwayName	ProteinsIntersection	Pvalue	FDRCorrection	BonferroniCorrection
KEGG	Neuroactive ligand-receptor interaction	19	5.57398e-17	1.83941e-14	1.83941e-14
KEGG	Cytokine-cytokine receptor interaction	81	1.96191e-10	3.23715e-08	6.47431e-08
KEGG	Metabolic pathways	246	3.27452e-10	3.60198e-08	1.08059e-07
KEGG	Ribosome	27	1.13588e-09	9.371e-08	3.7484e-07
KEGG	Oxidative phosphorylation	17	6.51611e-08	4.30063e-06	2.15032e-05
KEGG	cGMP-PKG signaling pathway	13	3.64582e-06	0.00020052	0.00120312
KEGG	Taste transduction	4	1.66227e-05	0.00078364	0.00548548
KEGG	Primary immunodeficiency	6	5.71949e-05	0.00235929	0.0188743
KEGG	Allograft rejection	1	0.000136142	0.00499186	0.0449267
KEGG	Inflammatory mediator regulation of TRP channels	8	0.000143933	0.00474979	0.0474979
KEGG	Bile secretion	12	0.000148773	0.0044632	0.0490952
KEGG	Basal transcription factors	6	0.000159195	0.00437786	0.0525343
KEGG	Steroid hormone biosynthesis	5	0.000159887	0.00405867	0.0527627
KEGG	RNA polymerase	4	0.00026336	0.00620776	0.0869087
KEGG	Th17 cell differentiation	17	0.000354143	0.00779116	0.116867
KEGG	Ovarian steroidogenesis	5	0.000450273	0.00928688	0.14859
KEGG	Aminoacyl-tRNA biosynthesis	1	0.000485135	0.00941732	0.160095
KEGG	Asthma	1	0.000485135	0.00889414	0.160095
KEGG	Cushing syndrome	21	0.000529103	0.00918968	0.174604
KEGG	Insulin signaling pathway	18	0.000631582	0.0104211	0.208422
KEGG	Cortisol synthesis and secretion	7	0.000649866	0.0102122	0.214456
KEGG	Th1 and Th2 cell differentiation	13	0.000686303	0.0102945	0.22648
KEGG	Systemic lupus erythematosus	6	0.000706241	0.010133	0.23306
KEGG	Viral protein interaction with cytokine and cytokine receptor	25	0.000707701	0.00973089	0.233541
KEGG	Spliceosome	22	0.000882948	0.0116549	0.291373
KEGG	Graft-versus-host disease	1	0.000910526	0.0115567	0.300474
KEGG	N-Glycan biosynthesis	8	0.000925526	0.011312	0.305424
KEGG	Inflammatory bowel disease	11	0.000939918	0.0110776	0.310173
KEGG	Calcium signaling pathway	13	0.00102353	0.011647	0.337764
KEGG	T cell receptor signaling pathway	19	0.00108522	0.0119374	0.358121
KEGG	Dopaminergic synapse	10	0.00109279	0.0116329	0.360621
KEGG	Olfactory transduction	2	0.00116728	0.0120376	0.385204
KEGG	Maturity onset diabetes of the young	5	0.00123434	0.0123434	0.407332
KEGG	Arachidonic acid metabolism	5	0.00123434	0.0119803	0.407332
KEGG	Insulin secretion	9	0.00126298	0.0119081	0.416784
KEGG	Pathways of neurodegeneration - multiple diseases	66	0.00132195	0.0121179	0.436245
KEGG	Intestinal immune network for IgA production	7	0.00164423	0.0146648	0.542597
KEGG	Human cytomegalovirus infection	37	0.00203657	0.017686	0.672068
KEGG	Signaling pathways regulating pluripotency of stem cells	21	0.00208533	0.0176451	0.68816
KEGG	Carbon metabolism	17	0.00223536	0.0184417	0.737669
KEGG	Cytosolic DNA-sensing pathway	6	0.00293579	0.0236295	0.96881
KEGG	Phototransduction	1	0.00316195	0.0248439	1
KEGG	Thermogenesis	15	0.00324596	0.0249108	1
KEGG	Ubiquitin mediated proteolysis	37	0.00348397	0.0261298	1
KEGG	Complement and coagulation cascades	20	0.00350256	0.0256854	1
KEGG	Salivary secretion	10	0.00377129	0.0270549	1
KEGG	Aldosterone synthesis and secretion	10	0.00377129	0.0264792	1
KEGG	Huntington disease	26	0.00385727	0.0265187	1
KEGG	C-type lectin receptor signaling pathway	22	0.00451218	0.0303882	1
KEGG	RIG-I-like receptor signaling pathway	15	0.00462966	0.0305557	1
KEGG	Cocaine addiction	6	0.00464115	0.030031	1
KEGG	NF-kappa B signaling pathway	31	0.00470907	0.0298845	1
KEGG	Vascular smooth muscle contraction	13	0.00471639	0.0293662	1
KEGG	MicroRNAs in cancer	79	0.00485132	0.0296469	1

## Sheet: THCA_Enrich
Pathway Source	PathwayName	ProteinsIntersection	Pvalue	FDRCorrection	BonferroniCorrection
KEGG	Metabolic pathways	75	1.586e-111	4.98004e-109	4.98004e-109
KEGG	Cytokine-cytokine receptor interaction	32	1.0216e-40	1.60391e-38	3.20782e-38
KEGG	Pathways in cancer	31	2.49885e-30	2.61546e-28	7.84639e-28
KEGG	Pathways of neurodegeneration - multiple diseases	22	7.5589e-26	5.93373e-24	2.37349e-23
KEGG	Transcriptional misregulation in cancer	19	2.71123e-23	1.70265e-21	8.51327e-21
KEGG	Human T-cell leukemia virus 1 infection	9	6.99988e-22	3.66327e-20	2.19796e-19
KEGG	Shigellosis	15	1.38305e-19	6.20395e-18	4.34277e-17
KEGG	Salmonella infection	17	2.12756e-19	8.35067e-18	6.68053e-17
KEGG	Proteoglycans in cancer	14	3.5137e-19	1.22589e-17	1.1033e-16
KEGG	Human papillomavirus infection	15	1.45358e-18	4.56426e-17	4.56426e-16
KEGG	NOD-like receptor signaling pathway	12	2.16829e-18	6.18947e-17	6.80842e-16
KEGG	Axon guidance	8	2.83831e-18	7.42691e-17	8.91229e-16
KEGG	Viral carcinogenesis	9	4.50513e-18	1.08816e-16	1.41461e-15
KEGG	Cell cycle	4	5.16661e-18	1.1588e-16	1.62232e-15
KEGG	Tuberculosis	9	8.35295e-18	1.74855e-16	2.62283e-15
KEGG	Ubiquitin mediated proteolysis	11	1.75225e-17	3.43878e-16	5.50206e-15
KEGG	Kaposi sarcoma-associated herpesvirus infection	12	2.36962e-17	4.37683e-16	7.44061e-15
KEGG	Neuroactive ligand-receptor interaction	19	2.72458e-17	4.75288e-16	8.55518e-15
KEGG	Epstein-Barr virus infection	13	5.55218e-17	9.17571e-16	1.74339e-14
KEGG	Oxidative phosphorylation	6	7.94115e-17	1.24676e-15	2.49352e-14
KEGG	Tight junction	6	1.49846e-16	2.24056e-15	4.70517e-14
KEGG	Ribosome	17	2.02384e-16	2.88857e-15	6.35485e-14
KEGG	Alzheimer disease	16	3.10465e-16	4.23852e-15	9.74859e-14
KEGG	RNA transport	12	8.19161e-16	1.07174e-14	2.57216e-13
KEGG	Cell adhesion molecules	10	8.51631e-16	1.06965e-14	2.67412e-13
KEGG	Autophagy - animal	11	1.14208e-15	1.37928e-14	3.58613e-13
KEGG	Protein processing in endoplasmic reticulum	8	1.39276e-15	1.61973e-14	4.37328e-13
KEGG	Influenza A	12	1.47043e-15	1.64898e-14	4.61715e-13
KEGG	Herpes simplex virus 1 infection	13	1.82708e-15	1.97829e-14	5.73703e-13
KEGG	Human immunodeficiency virus 1 infection	11	2.06151e-15	2.15772e-14	6.47316e-13
KEGG	MAPK signaling pathway	17	3.29395e-15	3.33645e-14	1.0343e-12
KEGG	cAMP signaling pathway	8	8.69425e-15	8.53123e-14	2.72999e-12
KEGG	Carbon metabolism	2	1.57762e-14	1.50113e-13	4.95374e-12
KEGG	Amyotrophic lateral sclerosis	18	1.85542e-14	1.71353e-13	5.82601e-12
KEGG	MicroRNAs in cancer	23	2.15694e-14	1.93509e-13	6.7728e-12
KEGG	Endocytosis	15	2.43458e-14	2.12349e-13	7.64457e-12
KEGG	Natural killer cell mediated cytotoxicity	5	2.49943e-14	2.12113e-13	7.8482e-12
KEGG	Measles	7	3.63866e-14	3.00669e-13	1.14254e-11
KEGG	Spliceosome	6	4.28497e-14	3.44995e-13	1.34548e-11
KEGG	Hepatitis B	13	5.66067e-14	4.44362e-13	1.77745e-11
KEGG	Wnt signaling pathway	7	6.71226e-14	5.14061e-13	2.10765e-11
KEGG	Hepatocellular carcinoma	7	2.27306e-13	1.69939e-12	7.13742e-11
KEGG	Chemokine signaling pathway	2	2.29364e-13	1.67489e-12	7.20203e-11
KEGG	Hippo signaling pathway	5	3.11474e-13	2.22279e-12	9.78028e-11
KEGG	Apoptosis	11	1.21914e-12	8.50691e-12	3.82811e-10
KEGG	Oxytocin signaling pathway	3	2.09164e-12	1.42777e-11	6.56775e-10
KEGG	Yersinia infection	11	2.15345e-12	1.43869e-11	6.76184e-10
KEGG	Human cytomegalovirus infection	18	2.26765e-12	1.48342e-11	7.12042e-10
KEGG	T cell receptor signaling pathway	6	5.90324e-12	3.78289e-11	1.85362e-09
KEGG	Cushing syndrome	8	6.31215e-12	3.96403e-11	1.98202e-09
KEGG	Oocyte meiosis	2	6.36685e-12	3.91998e-11	1.99919e-09
KEGG	Ribosome biogenesis in eukaryotes	4	7.75579e-12	4.68331e-11	2.43532e-09
KEGG	Signaling pathways regulating pluripotency of stem cells	7	8.46602e-12	5.01572e-11	2.65833e-09
KEGG	Huntington disease	10	9.93485e-12	5.77693e-11	3.11954e-09
KEGG	Pathogenic Escherichia coli infection	15	9.97208e-12	5.69315e-11	3.13123e-09
KEGG	Cellular senescence	11	1.172e-11	6.57157e-11	3.68008e-09
KEGG	FoxO signaling pathway	9	1.44416e-11	7.95556e-11	4.53467e-09
KEGG	Bile secretion	3	1.45491e-11	7.87661e-11	4.56843e-09
KEGG	cGMP-PKG signaling pathway	6	1.98741e-11	1.05771e-10	6.24048e-09
KEGG	Th17 cell differentiation	6	1.98741e-11	1.04008e-10	6.24048e-09
KEGG	Fluid shear stress and atherosclerosis	9	2.56855e-11	1.32217e-10	8.06526e-09
KEGG	NF-kappa B signaling pathway	14	2.75117e-11	1.39333e-10	8.63866e-09
KEGG	Platelet activation	7	2.78473e-11	1.38795e-10	8.74406e-09
KEGG	Toll-like receptor signaling pathway	7	2.78473e-11	1.36626e-10	8.74406e-09
KEGG	Peroxisome	7	2.78473e-11	1.34524e-10	8.74406e-09
KEGG	RNA degradation	5	4.48433e-11	2.13345e-10	1.40808e-08
KEGG	Neurotrophin signaling pathway	10	5.43787e-11	2.54849e-10	1.70749e-08
KEGG	Hepatitis C	12	6.96932e-11	3.21819e-10	2.18837e-08
KEGG	Viral protein interaction with cytokine and cytokine receptor	12	6.96932e-11	3.17155e-10	2.18837e-08
KEGG	PPAR signaling pathway	3	9.98822e-11	4.48043e-10	3.1363e-08
KEGG	Spinocerebellar ataxia	8	1.1675e-10	5.16329e-10	3.66594e-08
KEGG	TNF signaling pathway	12	1.20247e-10	5.2441e-10	3.77575e-08
KEGG	Adherens junction	4	1.78857e-10	7.69331e-10	5.61611e-08
KEGG	Rap1 signaling pathway	11	1.88703e-10	8.00713e-10	5.92528e-08
KEGG	Gastric cancer	8	2.07869e-10	8.70276e-10	6.52707e-08
KEGG	Hematopoietic cell lineage	9	2.51303e-10	1.03828e-09	7.89093e-08
KEGG	Th1 and Th2 cell differentiation	4	3.33222e-10	1.35885e-09	1.04632e-07
KEGG	Parkinson disease	8	3.69231e-10	1.48639e-09	1.15939e-07
KEGG	Colorectal cancer	6	3.9906e-10	1.58614e-09	1.25305e-07
KEGG	Leukocyte transendothelial migration	6	3.9906e-10	1.56631e-09	1.25305e-07
KEGG	Regulation of actin cytoskeleton	10	5.07659e-10	1.96796e-09	1.59405e-07
KEGG	p53 signaling pathway	7	5.26431e-10	2.01584e-09	1.65299e-07
KEGG	Phagosome	7	5.26431e-10	1.99156e-09	1.65299e-07
KEGG	Calcium signaling pathway	4	6.19603e-10	2.31613e-09	1.94555e-07
KEGG	TGF-beta signaling pathway	6	7.22364e-10	2.6685e-09	2.26822e-07
KEGG	Primary immunodeficiency	1	9.15734e-10	3.34349e-09	2.87541e-07
KEGG	Apelin signaling pathway	6	1.30454e-09	4.70835e-09	4.09626e-07
KEGG	mRNA surveillance pathway	6	1.30454e-09	4.65484e-09	4.09626e-07
KEGG	HIF-1 signaling pathway	8	2.0388e-09	7.19307e-09	6.40183e-07
KEGG	Glutamatergic synapse	2	2.33877e-09	8.15969e-09	7.34372e-07
KEGG	Lysosome	9	2.36447e-09	8.15871e-09	7.42443e-07
KEGG	PI3K-Akt signaling pathway	15	3.09454e-09	1.05618e-08	9.71685e-07
KEGG	Aldosterone synthesis and secretion	2	4.47562e-09	1.51112e-08	1.40534e-06
KEGG	Osteoclast differentiation	10	4.54811e-09	1.51926e-08	1.42811e-06
KEGG	mTOR signaling pathway	11	4.87491e-09	1.61129e-08	1.53072e-06
KEGG	PD-L1 expression and PD-1 checkpoint pathway in cancer	6	7.57037e-09	2.47614e-08	2.3771e-06
KEGG	Ras signaling pathway	11	8.30029e-09	2.6869e-08	2.60629e-06
KEGG	Dopaminergic synapse	3	8.42982e-09	2.70098e-08	2.64696e-06
KEGG	Alcoholism	2	8.55049e-09	2.71197e-08	2.68485e-06
KEGG	Estrogen signaling pathway	4	1.33399e-08	4.18874e-08	4.18874e-06
KEGG	Necroptosis	10	1.33846e-08	4.16116e-08	4.20277e-06
KEGG	Valine, leucine and isoleucine degradation	1	1.34362e-08	4.13623e-08	4.21895e-06
KEGG	Prostate cancer	6	1.3533e-08	4.12558e-08	4.24935e-06
KEGG	Thermogenesis	6	1.3533e-08	4.08591e-08	4.24935e-06
KEGG	Parathyroid hormone synthesis, secretion and action	7	1.65338e-08	4.9444e-08	5.19162e-06
KEGG	RIG-I-like receptor signaling pathway	6	2.41246e-08	7.14634e-08	7.57512e-06
KEGG	Cholesterol metabolism	4	2.44752e-08	7.18244e-08	7.68521e-06
KEGG	Arginine and proline metabolism	1	2.62193e-08	7.62301e-08	8.23285e-06
KEGG	Cysteine and methionine metabolism	1	2.62193e-08	7.55308e-08	8.23285e-06
KEGG	Progesterone-mediated oocyte maturation	2	3.10416e-08	8.86098e-08	9.74708e-06
KEGG	Breast cancer	9	3.66105e-08	1.03565e-07	1.14957e-05
KEGG	Growth hormone synthesis, secretion and action	6	4.28817e-08	1.20222e-07	1.34649e-05
KEGG	Mitophagy - animal	6	4.28817e-08	1.19158e-07	1.34649e-05
KEGG	Relaxin signaling pathway	8	5.77185e-08	1.58979e-07	1.81236e-05
KEGG	Vascular smooth muscle contraction	5	6.08184e-08	1.66061e-07	1.9097e-05
KEGG	Focal adhesion	10	6.60282e-08	1.78732e-07	2.07329e-05
KEGG	C-type lectin receptor signaling pathway	12	6.7743e-08	1.81806e-07	2.12713e-05
KEGG	Renal cell carcinoma	4	8.17495e-08	2.17537e-07	2.56693e-05
KEGG	Bacterial invasion of epithelial cells	3	1.01626e-07	2.68155e-07	3.19104e-05
KEGG	Non-alcoholic fatty liver disease	9	1.07186e-07	2.80469e-07	3.36562e-05
KEGG	Inflammatory bowel disease	5	1.09103e-07	2.83127e-07	3.42584e-05
KEGG	Chronic myeloid leukemia	5	1.09103e-07	2.80807e-07	3.42584e-05
KEGG	Rheumatoid arthritis	5	1.09103e-07	2.78524e-07	3.42584e-05
KEGG	Legionellosis	5	1.09103e-07	2.76277e-07	3.42584e-05
KEGG	Pancreatic secretion	5	1.09103e-07	2.74067e-07	3.42584e-05
KEGG	IL-17 signaling pathway	13	1.09767e-07	2.73545e-07	3.44667e-05
KEGG	AMPK signaling pathway	10	1.11667e-07	2.76089e-07	3.50633e-05
KEGG	Biosynthesis of amino acids	4	1.48788e-07	3.64997e-07	4.67196e-05
KEGG	Inflammatory mediator regulation of TRP channels	4	1.48788e-07	3.62167e-07	4.67196e-05
KEGG	Sphingolipid signaling pathway	9	1.82474e-07	4.40744e-07	5.72968e-05
KEGG	Chagas disease	9	1.82474e-07	4.3738e-07	5.72968e-05
KEGG	B cell receptor signaling pathway	5	1.95124e-07	4.64159e-07	6.1269e-05
KEGG	Fc gamma R-mediated phagocytosis	6	2.36417e-07	5.58157e-07	7.42348e-05
KEGG	Prolactin signaling pathway	4	2.70011e-07	6.32712e-07	8.47834e-05
KEGG	Adrenergic signaling in cardiomyocytes	5	3.47854e-07	8.09083e-07	0.000109226
KEGG	GnRH signaling pathway	5	3.47854e-07	8.03133e-07	0.000109226
KEGG	Systemic lupus erythematosus	2	3.99398e-07	9.15408e-07	0.000125411
KEGG	Pancreatic cancer	7	4.67183e-07	1.06301e-06	0.000146695
KEGG	Insulin signaling pathway	12	5.05692e-07	1.14235e-06	0.000158787
KEGG	Cortisol synthesis and secretion	3	6.40304e-07	1.43611e-06	0.000201055
KEGG	Melanogenesis	3	6.40304e-07	1.42592e-06	0.000201055
KEGG	Basal transcription factors	3	6.40304e-07	1.41588e-06	0.000201055
KEGG	DNA replication	3	6.40304e-07	1.40598e-06	0.000201055
KEGG	Endometrial cancer	4	8.8092e-07	1.9209e-06	0.000276609
KEGG	Pertussis	9	8.80961e-07	1.90774e-06	0.000276622
KEGG	Longevity regulating pathway	6	1.26423e-06	2.71897e-06	0.000396969
KEGG	Leishmaniasis	6	1.26423e-06	2.70047e-06	0.000396969
KEGG	Thyroid hormone signaling pathway	12	1.35091e-06	2.86612e-06	0.000424186
KEGG	Protein digestion and absorption	1	1.40493e-06	2.96073e-06	0.000441149
KEGG	Notch signaling pathway	1	1.40493e-06	2.94099e-06	0.000441149
KEGG	Nucleotide excision repair	2	1.41287e-06	2.93803e-06	0.000443642
KEGG	Endocrine resistance	8	1.4534e-06	3.00241e-06	0.000456367
KEGG	Serotonergic synapse	4	1.58322e-06	3.24922e-06	0.00049713
KEGG	Complement and coagulation cascades	13	2.04361e-06	4.16684e-06	0.000641694
KEGG	Taste transduction	3	2.15241e-06	4.36037e-06	0.000675857
KEGG	Amino sugar and nucleotide sugar metabolism	3	2.15241e-06	4.33242e-06	0.000675857
KEGG	Fanconi anemia pathway	7	2.36775e-06	4.73551e-06	0.000743475
KEGG	ECM-receptor interaction	9	2.46795e-06	4.90466e-06	0.000774937
KEGG	Alanine, aspartate and glutamate metabolism	2	2.64682e-06	5.22706e-06	0.000831103
KEGG	Cytosolic DNA-sensing pathway	2	2.64682e-06	5.19439e-06	0.000831103
KEGG	Salivary secretion	5	3.39245e-06	6.61633e-06	0.00106523
KEGG	Insulin secretion	5	3.39245e-06	6.57549e-06	0.00106523
KEGG	Prion disease	12	3.55042e-06	6.83945e-06	0.00111483
KEGG	Amoebiasis	6	3.79314e-06	7.26248e-06	0.00119105
KEGG	Steroid hormone biosynthesis	3	3.92696e-06	7.47312e-06	0.00123306
KEGG	EGFR tyrosine kinase inhibitor resistance	9	4.1048e-06	7.76451e-06	0.00128891
KEGG	Purine metabolism	8	4.13059e-06	7.76649e-06	0.001297
KEGG	Arachidonic acid metabolism	2	4.94418e-06	9.24091e-06	0.00155247
KEGG	RNA polymerase	2	4.94418e-06	9.18623e-06	0.00155247
KEGG	Malaria	4	5.05833e-06	9.34303e-06	0.00158831
KEGG	Vitamin digestion and absorption	1	5.2244e-06	9.59335e-06	0.00164046
KEGG	Autophagy - other	1	5.2244e-06	9.53758e-06	0.00164046
KEGG	Dilated cardiomyopathy	5	5.93746e-06	1.07767e-05	0.00186436
KEGG	AGE-RAGE signaling pathway in diabetic complications	11	6.1567e-06	1.11104e-05	0.0019332
KEGG	Toxoplasmosis	10	6.5287e-06	1.17144e-05	0.00205001
KEGG	Phospholipase D signaling pathway	10	6.5287e-06	1.16478e-05	0.00205001
KEGG	Glucagon signaling pathway	6	6.52937e-06	1.15832e-05	0.00205022
KEGG	Proteasome	8	6.91829e-06	1.22042e-05	0.00217234
KEGG	Glycine, serine and threonine metabolism	3	7.13911e-06	1.25234e-05	0.00224168
KEGG	Circadian entrainment	3	7.13911e-06	1.24538e-05	0.00224168
KEGG	JAK-STAT signaling pathway	4	8.98854e-06	1.55934e-05	0.0028224
KEGG	Thyroid hormone synthesis	4	8.98854e-06	1.55077e-05	0.0028224
KEGG	Antigen processing and presentation	2	9.20711e-06	1.5798e-05	0.00289103
KEGG	Long-term potentiation	2	9.20711e-06	1.57121e-05	0.00289103
KEGG	Glioma	5	1.03475e-05	1.75628e-05	0.00324912
KEGG	Fc epsilon RI signaling pathway	6	1.11896e-05	1.889e-05	0.00351353
KEGG	Platinum drug resistance	7	1.15591e-05	1.94094e-05	0.00362956
KEGG	Amphetamine addiction	3	1.29298e-05	2.15954e-05	0.00405994
KEGG	VEGF signaling pathway	3	1.29298e-05	2.14812e-05	0.00405994
KEGG	Ferroptosis	3	1.29298e-05	2.13681e-05	0.00405994
KEGG	Glycolysis / Gluconeogenesis	3	1.29298e-05	2.12562e-05	0.00405994
KEGG	Drug metabolism - other enzymes	3	1.29298e-05	2.11455e-05	0.00405994
KEGG	Insulin resistance	12	1.46346e-05	2.38097e-05	0.00459527
KEGG	Staphylococcus aureus infection	4	1.59051e-05	2.57434e-05	0.00499421
KEGG	SNARE interactions in vesicular transport	2	1.7089e-05	2.75176e-05	0.00536593
KEGG	Retrograde endocannabinoid signaling	2	1.7089e-05	2.73772e-05	0.00536593
KEGG	Cholinergic synapse	5	1.79521e-05	2.8614e-05	0.00563696
KEGG	Hypertrophic cardiomyopathy	6	1.90867e-05	3.02688e-05	0.00599323
KEGG	Acute myeloid leukemia	8	1.91383e-05	3.01982e-05	0.00600944
KEGG	Non-small cell lung cancer	8	1.91383e-05	3.00472e-05	0.00600944
KEGG	Small cell lung cancer	8	1.91383e-05	2.98977e-05	0.00600944
KEGG	Mineral absorption	4	2.80181e-05	4.35529e-05	0.00879769
KEGG	Fatty acid metabolism	4	2.80181e-05	4.33384e-05	0.00879769
KEGG	Bladder cancer	4	2.80181e-05	4.31259e-05	0.00879769
KEGG	Phosphatidylinositol signaling system	4	2.80181e-05	4.29155e-05	0.00879769
KEGG	ABC transporters	9	2.99985e-05	4.57259e-05	0.00941954
KEGG	Homologous recombination	5	3.09978e-05	4.70207e-05	0.00973329
KEGG	Epithelial cell signaling in Helicobacter pylori infection	5	3.09978e-05	4.67947e-05	0.00973329
KEGG	Glyoxylate and dicarboxylate metabolism	1	3.68464e-05	5.53577e-05	0.0115698
KEGG	African trypanosomiasis	3	4.18896e-05	6.26349e-05	0.0131533
KEGG	GABAergic synapse	3	4.18896e-05	6.23381e-05	0.0131533
KEGG	Tryptophan metabolism	3	4.18896e-05	6.2044e-05	0.0131533
KEGG	Endocrine and other factor-regulated calcium reabsorption	2	5.82284e-05	8.58391e-05	0.0182837
KEGG	Type II diabetes mellitus	2	5.82284e-05	8.5438e-05	0.0182837
KEGG	Fatty acid degradation	1	7.02935e-05	0.000102661	0.0220721
KEGG	Porphyrin and chlorophyll metabolism	1	7.02935e-05	0.000102186	0.0220721
KEGG	Glycosylphosphatidylinositol (GPI)-anchor biosynthesis	3	7.48891e-05	0.000108365	0.0235152
KEGG	Ovarian steroidogenesis	4	8.56827e-05	0.000123414	0.0269044
KEGG	Choline metabolism in cancer	7	8.94449e-05	0.000128245	0.0280857
KEGG	Intestinal immune network for IgA production	5	9.10056e-05	0.00012989	0.0285758
KEGG	Glycerophospholipid metabolism	5	9.10056e-05	0.000129302	0.0285758
KEGG	Renin secretion	6	9.18774e-05	0.000129953	0.0288495
KEGG	Pyruvate metabolism	2	0.000106831	0.000150426	0.0335451
KEGG	Glycosphingolipid biosynthesis - lacto and neolacto series	2	0.000106831	0.000149755	0.0335451
KEGG	Base excision repair	3	0.00013322	0.000185916	0.0418311
KEGG	Primary bile acid biosynthesis	1	0.000133696	0.000185755	0.0419807
KEGG	Pyrimidine metabolism	4	0.000148647	0.000205618	0.0466753
KEGG	Melanoma	4	0.000148647	0.000204716	0.0466753
KEGG	Regulation of lipolysis in adipocytes	4	0.000148647	0.000203822	0.0466753
KEGG	ErbB signaling pathway	11	0.000159874	0.000218263	0.0502006
KEGG	Type I diabetes mellitus	2	0.000195116	0.000265222	0.0612663
KEGG	Thyroid cancer	2	0.000195116	0.000264079	0.0612663
KEGG	Tyrosine metabolism	3	0.000235716	0.00031766	0.0740147
KEGG	Antifolate resistance	3	0.000235716	0.000316302	0.0740147
KEGG	N-Glycan biosynthesis	7	0.000240556	0.000321424	0.0755346
KEGG	Glycosaminoglycan biosynthesis - heparan sulfate / heparin	1	0.000253438	0.000337201	0.0795794
KEGG	Biosynthesis of unsaturated fatty acids	1	0.000253438	0.000335778	0.0795794
KEGG	Glycerolipid metabolism	1	0.000253438	0.000334367	0.0795794
KEGG	Hippo signaling pathway - multiple species	1	0.000253438	0.000332968	0.0795794
KEGG	Fructose and mannose metabolism	1	0.000253438	0.000331581	0.0795794
KEGG	Nicotinate and nicotinamide metabolism	1	0.000253438	0.000330205	0.0795794
KEGG	Cocaine addiction	4	0.000256386	0.000332666	0.0805053
KEGG	GnRH secretion	4	0.000256386	0.000331297	0.0805053
KEGG	Maturity onset diabetes of the young	4	0.000256386	0.00032994	0.0805053
KEGG	Aldosterone-regulated sodium reabsorption	2	0.000354594	0.000454459	0.111342
KEGG	Lysine degradation	2	0.000354594	0.000452611	0.111342
KEGG	Folate biosynthesis	2	0.000354594	0.000450779	0.111342
KEGG	Metabolism of xenobiotics by cytochrome P450	2	0.000354594	0.000448961	0.111342
KEGG	Central carbon metabolism in cancer	7	0.000390756	0.000492761	0.122698
KEGG	Renin-angiotensin system	3	0.00041465	0.000520801	0.1302
KEGG	Apoptosis - multiple species	3	0.00041465	0.000518726	0.1302
KEGG	Viral myocarditis	6	0.000419768	0.000523045	0.131807
KEGG	Gastric acid secretion	5	0.000438285	0.000543959	0.137622
KEGG	Arrhythmogenic right ventricular cardiomyopathy	5	0.000438285	0.000541817	0.137622
KEGG	Long-term depression	4	0.000439457	0.000541136	0.13799
KEGG	Adipocytokine signaling pathway	8	0.00056753	0.000696111	0.178204
KEGG	Cardiac muscle contraction	2	0.00064092	0.000783069	0.201249
KEGG	Steroid biosynthesis	2	0.00064092	0.000780034	0.201249
KEGG	Protein export	3	0.000724821	0.000878741	0.227594
KEGG	Fat digestion and absorption	3	0.000724821	0.000875361	0.227594
KEGG	One carbon pool by folate	1	0.000900185	0.00108298	0.282658
KEGG	Morphine addiction	2	0.0011515	0.00138004	0.36157
KEGG	Olfactory transduction	2	0.0011515	0.00137479	0.36157
KEGG	Vibrio cholerae infection	2	0.0011515	0.00136958	0.36157
KEGG	Longevity regulating pathway - multiple species	5	0.00120836	0.00143179	0.379424
KEGG	Various types of N-glycan biosynthesis	3	0.0012583	0.00148536	0.395107
KEGG	Gap junction	8	0.00140928	0.00165735	0.442513
KEGG	Mismatch repair	1	0.00168505	0.00197427	0.529105
KEGG	Ether lipid metabolism	1	0.00168505	0.00196693	0.529105
KEGG	Inositol phosphate metabolism	6	0.00180166	0.00209526	0.565721
KEGG	Sphingolipid metabolism	5	0.00198314	0.00229781	0.622705
KEGG	Terpenoid backbone biosynthesis	2	0.00205503	0.00237236	0.645281
KEGG	Citrate cycle (TCA cycle)	2	0.00205503	0.00236367	0.645281
KEGG	Propanoate metabolism	3	0.00216799	0.00248449	0.680749
KEGG	Chemical carcinogenesis	3	0.00216799	0.00247545	0.680749
KEGG	Phototransduction	1	0.00313733	0.00356928	0.985122
KEGG	Pentose and glucuronate interconversions	1	0.00313733	0.0035564	0.985122
KEGG	Carbohydrate digestion and absorption	3	0.00370438	0.00418409	1
KEGG	beta-Alanine metabolism	3	0.00370438	0.00416909	1
KEGG	Synaptic vesicle cycle	3	0.00370438	0.0041542	1

## Sheet: GSE65144_THCA_Inters
50 common elements in "thca" and "gse":
Metabolic pathways
Cytokine-cytokine receptor interaction
Pathways of neurodegeneration - multiple diseases
Ubiquitin mediated proteolysis
Neuroactive ligand-receptor interaction
Oxidative phosphorylation
Ribosome
Carbon metabolism
MicroRNAs in cancer
Spliceosome
Human cytomegalovirus infection
T cell receptor signaling pathway
Cushing syndrome
Signaling pathways regulating pluripotency of stem cells
Huntington disease
Bile secretion
cGMP-PKG signaling pathway
Th17 cell differentiation
NF-kappa B signaling pathway
Viral protein interaction with cytokine and cytokine receptor
Th1 and Th2 cell differentiation
Calcium signaling pathway
Primary immunodeficiency
Aldosterone synthesis and secretion
Dopaminergic synapse
Thermogenesis
RIG-I-like receptor signaling pathway
Vascular smooth muscle contraction
C-type lectin receptor signaling pathway
Inflammatory bowel disease
Inflammatory mediator regulation of TRP channels
Systemic lupus erythematosus
Insulin signaling pathway
Cortisol synthesis and secretion
Basal transcription factors
Complement and coagulation cascades
Taste transduction
Cytosolic DNA-sensing pathway
Salivary secretion
Insulin secretion
Steroid hormone biosynthesis
Arachidonic acid metabolism
RNA polymerase
Ovarian steroidogenesis
Intestinal immune network for IgA production
N-Glycan biosynthesis
Cocaine addiction
Maturity onset diabetes of the young
Olfactory transduction
Phototransduction
