# Supplementary material for: Using BioPAX-Parser (BiP) to enrich lists of genes or proteins with pathway data
Source: BMC Bioinformatics. 2021 Sep 30;22(Suppl 13):376. doi: 10.1186/s12859-021-04297-z (PMC8482563; doi:10.1186/s12859-021-04297-z)
Supplement: Supplementary file 3 — Additional file 3. The list of relevant enriched pathways(p value \documentclass[12pt]{minimal} \usepackage{amsmath} \usepackage{wasysym} \usepackage{amsfonts} \usepackage{amssymb} \usepackage{amsbsy} \usepackage{mathrsfs} \usepackage{upgreek} \setlength{\oddsidemargin}{-69pt} \begin{document}$$\le 0.005$$\end{document}≤0.005) obtained by CePa using each cancergene list and the related intersection between the two lists ofenriched pathways referring to the same cancer type. [file 12859_2021_4297_MOESM3_ESM.xlsx]

## Sheet: GSE41011_Enrich
Pathway Source	PathwayName	equal.weight	in.degree	out.degree	betweenness	in.reach	out.reach
KEGG	Pyrimidine biosynthesis	0.031469	0.029048	0.146853	0.037762	0.056643	0.034329
KEGG	Inactivation of APC C via direct inhibition of the APC C complex	0.044426	0.029048	0.034329	0.037762	0.056643	0.034329
KEGG	Removal of licensing factors from origins	0.031469	0.029048	0.034329	0.037762	0.047203	0.034329
KEGG	CDT1 association with the CDC6 ORC origin complex	0.031469	0.029048	0.066639	0.062937	0.047203	0.034329
KEGG	NCAM signaling for neurite out growth	0.031469	0.029048	0.034329	0.085823	0.121814	0.034329
KEGG	Switching of origins to a post replicative state	0.031469	0.029048	0.034329	0.037762	0.047203	0.034329
KEGG	Fanconi Anemia pathway	0.031469	0.029048	0.034329	0.037762	0.047203	0.041958
KEGG	Telomere C strand Lagging Strand Synthesis	0.056643	0.062937	0.066639	0.053946	0.056643	0.041958
KEGG	Branched chain amino acid catabolism	0.031469	0.029048	0.08991	0.053946	0.047203	0.034329
KEGG	Removal of DNA patch containing abasic residue	0.031469	0.062937	0.034329	0.085823	0.087144	0.034329
KEGG	Activation of the pre replicative complex	0.031469	0.029048	0.034329	0.037762	0.047203	0.041958
KEGG	Chk1 Chk2 Cds1 mediated inactivation of Cyclin B Cdk1 complex	0.044426	0.029048	0.034329	0.085823	0.047203	0.094406
KEGG	Intrinsic Pathway	0.044426	0.062937	0.066639	0.107892	0.188811	0.041958
KEGG	Repair synthesis for gap filling by DNA polymerase in TC NER	0.056643	0.053946	0.053946	0.053946	0.056643	0.041958
KEGG	Interleukin 1 signaling	0.078671	0.125874	0.08991	0.079499	0.174287	0.034329
KEGG	Beta oxidation of very long chain fatty acids	0.044426	0.062937	0.113287	0.037762	0.056643	0.034329
KEGG	Ubiquitin Mediated Degradation of Phosphorylated Cdc25A	0.068659	0.06993	0.034329	0.062937	0.078671	0.160203
KEGG	Methylation	0.068659	0.062937	0.079499	0.105734	0.087144	0.041958
KEGG	Polymerase switching on the C strand of the telomere	0.031469	0.029048	0.034329	0.037762	0.047203	0.041958
KEGG	MyD88 cascade	0.044426	0.029048	0.034329	0.037762	0.056643	0.034329
KEGG	Repair synthesis of patch 27 30 bases long by DNA polymerase	0.031469	0.062937	0.053946	0.062937	0.056643	0.056643
KEGG	Polymerase switching	0.031469	0.029048	0.053946	0.037762	0.056643	0.056643

## Sheet: COAD_Enrich
Pathway Source	pathwayName	equal.weight	in.degree	out.degree	betweenness	in.reach	out.reach
KEGG	Pyrimidine biosynthesis	0.0343293	0.0314685	0.188811	0.0314685	0.0377622	0.0377622
KEGG	Inactivation of APC C via direct inhibition of the APC C complex	0.0666392	0.0314685	0.0472028	0.0472028	0.0377622	0.0377622
KEGG	Removal of licensing factors from origins	0.0343293	0.0314685	0.0343293	0.0314685	0.0377622	0.0377622
KEGG	CDT1 association with the CDC6 ORC origin complex	0.0666392	0.0314685	0.0596246	0.0472028	0.0580958	0.0377622
KEGG	NCAM signaling for neurite out growth	0.0343293	0.0314685	0.0343293	0.0985102	0.0839161	0.0377622
KEGG	FGFR1c and Klotho ligand binding and activation	0.221648	0.0444262	0.16993	0.101668	0.0666392	0.180229
KEGG	Switching of origins to a post replicative state	0.0343293	0.0314685	0.0343293	0.0314685	0.0377622	0.0377622
KEGG	Fanconi Anemia pathway	0.0343293	0.0314685	0.0343293	0.0314685	0.0377622	0.0377622
KEGG	ChREBP activates metabolic gene expression	0.177705	0.0444262	0.321678	0.40041	0.0580958	0.338558
KEGG	Telomere C strand Lagging Strand Synthesis	0.0666392	0.0656735	0.0985102	0.0755245	0.0719281	0.0472028
KEGG	Branched chain amino acid catabolism	0.0343293	0.0314685	0.0472028	0.0314685	0.0377622	0.0377622
KEGG	Removal of DNA patch containing abasic residue	0.0343293	0.0314685	0.0343293	0.0899101	0.0786713	0.0596246
KEGG	Activation of the pre replicative complex	0.0343293	0.0314685	0.0343293	0.0314685	0.0377622	0.0377622
KEGG	Chk1 Chk2 Cds1 mediated inactivation of Cyclin B Cdk1 complex	0.0580958	0.0314685	0.0472028	0.133278	0.0377622	0.0906294
KEGG	Intrinsic Pathway	0.0794994	0.0596246	0.0472028	0.111888	0.122172	0.0596246
KEGG	Repair synthesis for gap filling by DNA polymerase in TC NER	0.0666392	0.0444262	0.0343293	0.0314685	0.0666392	0.0686586
KEGG	Interleukin 1 signaling	0.0794994	0.0699301	0.0944056	0.0985102	0.139124	0.0377622
KEGG	Methylation	0.0906294	0.0656735	0.0343293	0.0314685	0.0719281	0.0472028
KEGG	Polymerase switching on the C strand of the telomere	0.0343293	0.0444262	0.0343293	0.0314685	0.0377622	0.0472028
KEGG	MyD88 cascade	0.0343293	0.0444262	0.0343293	0.0314685	0.0377622	0.0472028
KEGG	Tie2 Signaling	0.0906294	0.0944056	0.117193	0.0472028	0.106206	0.129808
KEGG	Repair synthesis of patch 27 30 bases long by DNA polymerase	0.0906294	0.0809191	0.0343293	0.0314685	0.0580958	0.0472028
KEGG	Polymerase switching	0.0343293	0.0314685	0.0472028	0.0314685	0.0666392	0.0472028
KEGG	Signal attenuation	0.218623	0.0656735	0.146176	0.0472028	0.106206	0.107892

## Sheet: GSE41011_COAD_Inters
26 common elements in GSE41011 COAD
Pyrimidine biosynthesis
Inactivation of APC C via direct inhibition of the APC C complex
Removal of licensing factors from origins
CDT1 association with the CDC6 ORC origin complex
NCAM signaling for neurite out growth
FGFR1c and Klotho ligand binding and activation
Switching of origins to a post replicative state
Fanconi Anemia pathway
ChREBP activates metabolic gene expression
Telomere C strand Lagging Strand Synthesis
Branched chain amino acid catabolism
Removal of DNA patch containing abasic residue
Activation of the pre replicative complex
Chk1 Chk2 Cds1 mediated inactivation of Cyclin B Cdk1 complex
Intrinsic Pathway
Repair synthesis for gap filling by DNA polymerase in TC NER
Interleukin 1 signaling
Methylation
Polymerase switching on the C strand of the telomere
MyD88 cascade
Tie2 Signaling
Repair synthesis of patch 27 30 bases long by DNA polymerase
Polymerase switching
Signal attenuation
Beta oxidation of very long chain fatty acids
Ubiquitin Mediated Degradation of Phosphorylated Cdc25A

## Sheet: GSE63678_Enrich
Pathway Source	pathwayName	equal.weight	in.degree	out.degree	betweenness	in.reach	out.reach
KEGG	Pyrimidine_biosynthesis	0.0314685	0.0580958	0.125874	0.0314685	0.0444262	0.0377622
KEGG	Inactivation_of_APC_C_via_direct_inhibition_of_the_APC_C_complex	0.0596246	0.0580958	0.0314685	0.0314685	0.0444262	0.0444262
KEGG	Removal_of_licensing_factors_from_origins	0.0314685	0.0377622	0.0314685	0.0314685	0.0444262	0.0377622
KEGG	CDT1_association_with_the_CDC6_ORC_origin_complex	0.0314685	0.0377622	0.0596246	0.0314685	0.0539461	0.0444262
KEGG	NCAM_signaling_for_neurite_out_growth	0.0314685	0.0377622	0.0314685	0.0472028	0.125874	0.0444262
KEGG	FGFR1c_and_Klotho_ligand_binding_and_activation	0.166598	0.0656735	0.177705	0.0656735	0.0444262	0.200371
KEGG	Switching_of_origins_to_a_post_replicative_state	0.0314685	0.0377622	0.0472028	0.0314685	0.0444262	0.0444262
KEGG	Fanconi_Anemia_pathway	0.0314685	0.0377622	0.0314685	0.0314685	0.0444262	0.0377622
KEGG	ChREBP_activates_metabolic_gene_expression	0.226573	0.0656735	0.320623	0.396988	0.0444262	0.321155
KEGG	Telomere_C_strand__Lagging_Strand__Synthesis	0.0314685	0.0699301	0.0719281	0.0472028	0.0444262	0.0629371
KEGG	Branched_chain_amino_acid_catabolism	0.0314685	0.0377622	0.0472028	0.0314685	0.0444262	0.0377622
KEGG	Removal_of_DNA_patch_containing_abasic_residue	0.0314685	0.0629371	0.0314685	0.101668	0.0786713	0.0377622
KEGG	Activation_of_the_pre_replicative_complex	0.0314685	0.0377622	0.0314685	0.0314685	0.0444262	0.0377622
KEGG	Chk1_Chk2_Cds1__mediated_inactivation_of_Cyclin_B_Cdk1_complex	0.0314685	0.0580958	0.0314685	0.111888	0.0444262	0.0906294
KEGG	Intrinsic_Pathway	0.0472028	0.0699301	0.0472028	0.138462	0.125874	0.0686586
KEGG	Repair_synthesis_for_gap_filling_by_DNA_polymerase_in_TC_NER	0.0596246	0.0629371	0.0314685	0.0629371	0.0444262	0.0377622
KEGG	Interleukin_1_signaling	0.0596246	0.115385	0.0719281	0.0656735	0.154482	0.0377622
KEGG	Beta_oxidation_of_very_long_chain_fatty_acids	0.0820918	0.0699301	0.164605	0.0629371	0.0786713	0.0444262
KEGG	Ubiquitin_Mediated_Degradation_of_Phosphorylated_Cdc25A	0.166598	0.0781288	0.0314685	0.0314685	0.0444262	0.146176
KEGG	Methylation	0.0472028	0.0656735	0.0472028	0.0656735	0.0786713	0.0686586
KEGG	Polymerase_switching_on_the_C_strand_of_the_telomere	0.0472028	0.0377622	0.0314685	0.0472028	0.0444262	0.0444262
KEGG	MyD88_cascade	0.0472028	0.0377622	0.0314685	0.0314685	0.0444262	0.0377622
KEGG	Repair_synthesis_of_patch__27_30_bases_long__by_DNA_polymerase	0.0820918	0.0629371	0.0596246	0.0314685	0.0444262	0.0444262
KEGG	Polymerase_switching	0.0314685	0.0377622	0.0314685	0.0314685	0.0444262	0.0377622
KEGG	Signal_attenuation	0.198749	0.0629371	0.170829	0.0472028	0.0906294	0.154922

## Sheet: UCEC_Enrich
Pathway Source	pathwayName	equal.weight	in.degree	out.degree	betweenness	in.reach	out.reach
KEGG	Pyrimidine biosynthesis	0.0343293	0.041958	0.161838	0.0377622	0.0503497	0.0314685
KEGG	Inactivation of APC C via direct inhibition of the APC C complex	0.0343293	0.041958	0.0290479	0.0377622	0.0377622	0.0719281
KEGG	Generation of second messenger molecules	0.0755245	0.0604196	0.0290479	0.155492	0.114431	0.107892
KEGG	Removal of licensing factors from origins	0.0343293	0.041958	0.0290479	0.0377622	0.0377622	0.0314685
KEGG	CDT1 association with the CDC6 ORC origin complex	0.0472028	0.0596246	0.0290479	0.0580958	0.0503497	0.0314685
KEGG	NCAM signaling for neurite out growth	0.0343293	0.0580958	0.0290479	0.0794994	0.0726197	0.0314685
KEGG	Switching of origins to a post replicative state	0.0343293	0.041958	0.0290479	0.0377622	0.0377622	0.0314685
KEGG	Fanconi Anemia pathway	0.0343293	0.041958	0.0290479	0.0377622	0.0377622	0.0314685
KEGG	Telomere C strand Lagging Strand Synthesis	0.0343293	0.0580958	0.0566434	0.0794994	0.0629371	0.0719281
KEGG	Branched chain amino acid catabolism	0.0343293	0.041958	0.0444262	0.0377622	0.0503497	0.0314685
KEGG	Removal of DNA patch containing abasic residue	0.0343293	0.0580958	0.0290479	0.0794994	0.0726197	0.0314685
KEGG	Activation of the pre replicative complex	0.0343293	0.041958	0.0290479	0.0377622	0.0377622	0.0314685
KEGG	Chk1 Chk2 Cds1 mediated inactivation of Cyclin B Cdk1 complex	0.0472028	0.0596246	0.0656735	0.107892	0.0377622	0.0906294
KEGG	Intrinsic Pathway	0.0539461	0.0604196	0.0444262	0.0871436	0.142884	0.0444262
KEGG	Repair synthesis for gap filling by DNA polymerase in TC NER	0.0472028	0.0596246	0.0566434	0.0871436	0.0503497	0.0444262
KEGG	Interleukin 1 signaling	0.0539461	0.0915448	0.0444262	0.0871436	0.164605	0.0314685
KEGG	Beta oxidation of very long chain fatty acids	0.0656735	0.0596246	0.111888	0.0794994	0.0656735	0.0444262
KEGG	Activation of ATR in response to replication stress	0.146176	0.0755245	0.161838	0.483916	0.0377622	0.197394
KEGG	Methylation	0.0539461	0.0604196	0.0444262	0.0871436	0.0377622	0.0596246
KEGG	Polymerase switching on the C strand of the telomere	0.0343293	0.0596246	0.0290479	0.0755245	0.0656735	0.0314685
KEGG	MyD88 cascade	0.0472028	0.041958	0.0290479	0.0377622	0.0377622	0.0314685
KEGG	Repair synthesis of patch 27 30 bases long by DNA polymerase	0.0539461	0.0604196	0.0290479	0.0377622	0.0377622	0.0444262
KEGG	Polymerase switching	0.0472028	0.041958	0.0290479	0.0377622	0.0503497	0.0444262
KEGG
KEGG

## Sheet: GSE63678_UCEC_Inters
21 common elements in "gse63678" and "UCEC":
Pyrimidine_biosynthesis
Inactivation_of_APC_C_via_direct_inhibition_of_the_APC_C_complex
Removal_of_licensing_factors_from_origins
CDT1_association_with_the_CDC6_ORC_origin_complex
NCAM_signaling_for_neurite_out_growth
Switching_of_origins_to_a_post_replicative_state
Fanconi_Anemia_pathway
Telomere_C_strand__Lagging_Strand__Synthesis
Branched_chain_amino_acid_catabolism
Removal_of_DNA_patch_containing_abasic_residue
Activation_of_the_pre_replicative_complex
Chk1_Chk2_Cds1__mediated_inactivation_of_Cyclin_B_Cdk1_complex
Intrinsic_Pathway
Repair_synthesis_for_gap_filling_by_DNA_polymerase_in_TC_NER
Interleukin_1_signaling
Beta_oxidation_of_very_long_chain_fatty_acids
Methylation
Polymerase_switching_on_the_C_strand_of_the_telomere
MyD88_cascade
Repair_synthesis_of_patch__27_30_bases_long__by_DNA_polymerase
Polymerase_switching

## Sheet: GSE65144_Enrich
Pathway Source	pathwayName	equal.weight	in.degree	out.degree	betweenness	in.reach	out.reach
KEGG	Pyrimidine_biosynthesis	0.0343293	0.0343293	0.151049	0.041958	0.0251748	0.0343293
KEGG	Inactivation_of_APC_C_via_direct_inhibition_of_the_APC_C_complex	0.0539461	0.0343293	0.0503497	0.041958	0.0251748	0.0343293
KEGG	Removal_of_licensing_factors_from_origins	0.0343293	0.0343293	0.0472028	0.041958	0.0251748	0.0343293
KEGG	CDT1_association_with_the_CDC6_ORC_origin_complex	0.0708042	0.0343293	0.0566434	0.0629371	0.0251748	0.0472028
KEGG	NCAM_signaling_for_neurite_out_growth	0.0343293	0.0343293	0.0472028	0.107892	0.041958	0.0343293
KEGG	Switching_of_origins_to_a_post_replicative_state	0.0343293	0.0343293	0.0472028	0.041958	0.0251748	0.0343293
KEGG	Fanconi_Anemia_pathway	0.0343293	0.0343293	0.0472028	0.041958	0.0251748	0.0343293
KEGG	ChREBP_activates_metabolic_gene_expression	0.226573	0.0503497	0.35286	0.387737	0.0251748	0.36884
KEGG	Telomere_C_strand__Lagging_Strand__Synthesis	0.0858233	0.0566434	0.0566434	0.041958	0.051494	0.0858233
KEGG	Branched_chain_amino_acid_catabolism	0.0343293	0.0343293	0.0503497	0.041958	0.0251748	0.0472028
KEGG	Removal_of_DNA_patch_containing_abasic_residue	0.0343293	0.0503497	0.0472028	0.0794994	0.0871436	0.0472028
KEGG	Activation_of_the_pre_replicative_complex	0.0343293	0.0343293	0.0472028	0.041958	0.0251748	0.0472028
KEGG	Chk1_Chk2_Cds1__mediated_inactivation_of_Cyclin_B_Cdk1_complex	0.0343293	0.0343293	0.0472028	0.107892	0.041958	0.0979021
KEGG	Intrinsic_Pathway	0.0794994	0.0604196	0.0566434	0.133995	0.154922	0.0472028
KEGG	Repair_synthesis_for_gap_filling_by_DNA_polymerase_in_TC_NER	0.0708042	0.0566434	0.0566434	0.0708042	0.0251748	0.0719281
KEGG	Interleukin_1_signaling	0.0858233	0.0944056	0.0566434	0.107892	0.156575	0.0343293
KEGG	Beta_oxidation_of_very_long_chain_fatty_acids	0.0858233	0.0604196	0.151049	0.0794994	0.0979021	0.0343293
KEGG	Activation_of_ATR_in_response_to_replication_stress	0.182721	0.149061	0.141608	0.493164	0.0251748	0.178874
KEGG	Methylation	0.0794994	0.0604196	0.0503497	0.102988	0.0251748	0.0719281
KEGG	Polymerase_switching_on_the_C_strand_of_the_telomere	0.0343293	0.0343293	0.0503497	0.0629371	0.0251748	0.0343293
KEGG	MyD88_cascade	0.0539461	0.0604196	0.0472028	0.0708042	0.041958	0.0343293
KEGG	Repair_synthesis_of_patch__27_30_bases_long__by_DNA_polymerase	0.0539461	0.0503497	0.0503497	0.0629371	0.0251748	0.0719281
KEGG	Polymerase_switching	0.0343293	0.0503497	0.0503497	0.041958	0.0251748	0.0343293

## Sheet: THCA_Enrich
Pathway Source	pathwayName	equal.weight	in.degree	out.degree	betweenness	in.reach	out.reach
KEGG	Pyrimidine biosynthesis	0.0343293	0.0343293	0.180602	0.041958	0.0343293	0.0290479
KEGG	Inactivation of APC C via direct inhibition of the APC C complex	0.0472028	0.0503497	0.0290479	0.041958	0.0343293	0.0472028
KEGG	Generation of second messenger molecules	0.0343293	0.0971029	0.0596246	0.118007	0.0911502	0.118007
KEGG	Removal of licensing factors from origins	0.0343293	0.0343293	0.0290479	0.041958	0.0343293	0.0290479
KEGG	CDT1 association with the CDC6 ORC origin complex	0.0472028	0.0343293	0.041958	0.0580958	0.0719281	0.0290479
KEGG	Association of licensing factors with the pre replicative complex	0.20523	0.0343293	0.188811	1	0.0666392	0.232383
KEGG	NCAM signaling for neurite out growth	0.0343293	0.0629371	0.0290479	0.0686586	0.0911502	0.0290479
KEGG	Switching of origins to a post replicative state	0.0343293	0.0343293	0.0290479	0.041958	0.0343293	0.0290479
KEGG	Fanconi Anemia pathway	0.0343293	0.0343293	0.0290479	0.041958	0.0343293	0.0290479
KEGG	Telomere C strand Lagging Strand Synthesis	0.051494	0.0656735	0.041958	0.0820918	0.0755245	0.0290479
KEGG	Branched chain amino acid catabolism	0.0472028	0.0343293	0.0820918	0.041958	0.0343293	0.0290479
KEGG	Removal of DNA patch containing abasic residue	0.0343293	0.0343293	0.0290479	0.0686586	0.0944056	0.0290479
KEGG	Axonal growth stimulation	0.051494	0.0786713	0.0755245	0.0686586	0.0343293	0.0686586
KEGG	Activation of the pre replicative complex	0.0343293	0.0343293	0.0290479	0.041958	0.0343293	0.0290479
KEGG	Chk1 Chk2 Cds1 mediated inactivation of Cyclin B Cdk1 complex	0.0343293	0.0629371	0.0290479	0.0686586	0.0666392	0.111888
KEGG	Intrinsic Pathway	0.0472028	0.0852696	0.041958	0.0686586	0.14026	0.0755245
KEGG	Repair synthesis for gap filling by DNA polymerase in TC NER	0.051494	0.0503497	0.0290479	0.0686586	0.0666392	0.0686586
KEGG	Interleukin 1 signaling	0.051494	0.0852696	0.041958	0.113287	0.15309	0.0290479
KEGG	Methylation	0.051494	0.0503497	0.0290479	0.0686586	0.0666392	0.0686586
KEGG	Polymerase switching on the C strand of the telomere	0.0343293	0.0343293	0.041958	0.0580958	0.0629371	0.0290479
KEGG	MyD88 cascade	0.0343293	0.0343293	0.0290479	0.0580958	0.0343293	0.0290479
KEGG	Triglyceride Biosynthesis	0.241431	0.274634	0.129808	0.267769	0.266193	0.0472028
KEGG	Repair synthesis of patch 27 30 bases long by DNA polymerase	0.051494	0.0656735	0.0290479	0.0686586	0.0343293	0.0686586
KEGG	Polymerase switching	0.0472028	0.0503497	0.0290479	0.041958	0.0343293	0.0472028
KEGG	Signal attenuation	0.20523	0.0852696	0.180229	0.041958	0.0839161	0.118007

## Sheet: GSE65144_THCA_Inters
19 common elements in GSE65144 THCA
Pyrimidine biosynthesis
Inactivation of APC C via direct inhibition of the APC C complex
Removal of licensing factors from origins
CDT1 association with the CDC6 ORC origin complex
NCAM signaling for neurite out growth
Switching of origins to a post replicative state
Fanconi Anemia pathway
ChREBP activates metabolic gene expression
Telomere C strand Lagging Strand Synthesis
Branched chain amino acid catabolism
Removal of DNA patch containing abasic residue
Activation of the pre replicative complex
Chk1 Chk2 Cds1 mediated inactivation of Cyclin B Cdk1 complex
Intrinsic Pathway
Repair synthesis for gap filling by DNA polymerase in TC NER
Interleukin 1 signaling
Beta oxidation of very long chain fatty acids
Activation of ATR in response to replication stress
Methylation
Polymerase switching on the C strand of the telomere
MyD88 cascade
Repair synthesis of patch 27 30 bases long by DNA polymerase
Polymerase switching
Generation of second messenger molecules
Association of licensing factors with the pre replicative complex
Axonal growth stimulation
Triglyceride Biosynthesis
Signal attenuation
