# Supplementary material for: Using BioPAX-Parser (BiP) to enrich lists of genes or proteins with pathway data
Source: BMC Bioinformatics. 2021 Sep 30;22(Suppl 13):376. doi: 10.1186/s12859-021-04297-z (PMC8482563; doi:10.1186/s12859-021-04297-z)
Supplement: Supplementary file 4 — Additional file 4. The list of relevant enriched pathways(p value \documentclass[12pt]{minimal} \usepackage{amsmath} \usepackage{wasysym} \usepackage{amsfonts} \usepackage{amssymb} \usepackage{amsbsy} \usepackage{mathrsfs} \usepackage{upgreek} \setlength{\oddsidemargin}{-69pt} \begin{document}$$\le 0.005$$\end{document}≤0.005) obtained by pathDip using eachcancer gene list and the related intersection between the two listsof enriched pathways referring to the same cancer type. [file 12859_2021_4297_MOESM4_ESM.xlsx]

## Sheet: GSE41011_Enrich
Pathway Source	Pathway Name	p-value	q-value (FDR: BH-method)	q-value (Bonferroni)
KEGG	Pathways in cancer	1.92585e-50	6.16272e-48	6.16272e-48
KEGG	Human papillomavirus infection	6.34315e-32	1.0149e-29	2.02981e-29
KEGG	Endocytosis	4.27869e-28	4.56394e-26	1.36918e-25
KEGG	Lysosome	8.39999e-28	6.71999e-26	2.688e-25
KEGG	MicroRNAs in cancer	8.88146e-25	5.68413e-23	2.84207e-22
KEGG	Human T-cell leukemia virus 1 infection	1.42377e-24	7.59344e-23	4.55606e-22
KEGG	MAPK signaling	1.94308e-24	8.88265e-23	6.21786e-22
KEGG	Protein processing in endoplasmic reticulum	8.82476e-24	3.5299e-22	2.82392e-21
KEGG	Epstein-Barr virus infection	1.88554e-23	6.70414e-22	6.03373e-21
KEGG	Proteoglycans in cancer	2.28552e-23	7.31366e-22	7.31366e-21
KEGG	PI3K-Akt signaling	5.31082e-22	1.54497e-20	1.69946e-19
KEGG	Cell cycle	1.46814e-21	3.91504e-20	4.69805e-19
KEGG	Focal adhesion	1.61927e-21	3.9859e-20	5.18166e-19
KEGG	Purine metabolism	2.59658e-21	5.93504e-20	8.30906e-19
KEGG	Non-alcoholic fatty liver disease (NAFLD)	3.62509e-21	7.73353e-20	1.16003e-18
KEGG	Apoptosis	2.13048e-20	4.26096e-19	6.81754e-18
KEGG	Human cytomegalovirus infection	3.36327e-20	6.33086e-19	1.07625e-17
KEGG	Alzheimer disease	4.82854e-20	8.58407e-19	1.54513e-17
KEGG	Pyrimidine metabolism	5.45122e-20	9.181e-19	1.74439e-17
KEGG	Autophagy - animal	1.91658e-19	3.06653e-18	6.13306e-17
KEGG	Huntington disease	3.14863e-19	4.79791e-18	1.00756e-16
KEGG	Cellular senescence	1.20315e-18	1.67395e-17	3.85008e-16
KEGG	Axon guidance	1.19259e-18	1.73468e-17	3.81629e-16
KEGG	Chemokine signaling	1.80756e-18	2.41008e-17	5.78419e-16
KEGG	Hepatitis C	3.99568e-18	5.11447e-17	1.27862e-15
KEGG	Neurotrophin signaling	4.1806e-18	5.14535e-17	1.33779e-15
KEGG	Fluid shear stress and atherosclerosis	9.42252e-18	1.11674e-16	3.01521e-15
KEGG	Small cell lung cancer	1.75885e-17	2.01011e-16	5.62832e-15
KEGG	Hepatocellular carcinoma	1.89659e-17	2.09279e-16	6.06909e-15
KEGG	Transcriptional misregulation in cancer	2.17979e-17	2.32511e-16	6.97533e-15
KEGG	Tight junction	2.69681e-17	2.7838e-16	8.62979e-15
KEGG	RNA transport	4.12319e-17	4.12319e-16	1.31942e-14
KEGG	Kaposi sarcoma-associated herpesvirus infection	6.21654e-17	6.02816e-16	1.98929e-14
KEGG	FoxO signaling	8.58217e-17	8.07734e-16	2.74629e-14
KEGG	Tuberculosis	1.51575e-16	1.38583e-15	4.8504e-14
KEGG	Colorectal cancer	3.50174e-16	3.11266e-15	1.12056e-13
KEGG	Ubiquitin mediated proteolysis	3.98139e-16	3.44336e-15	1.27404e-13
KEGG	AGE-RAGE signaling pathway in diabetic complications	4.33074e-16	3.64694e-15	1.38584e-13
KEGG	TNF signaling	4.54511e-16	3.72932e-15	1.45444e-13
KEGG	Prostate cancer	4.89333e-16	3.91466e-15	1.56587e-13
KEGG	Pancreatic cancer	1.20421e-15	9.39871e-15	3.85347e-13
KEGG	Cushing syndrome	2.09565e-15	1.59669e-14	6.70608e-13
KEGG	Regulation of actin cytoskeleton	3.68551e-15	2.74271e-14	1.17936e-12
KEGG	Human immunodeficiency virus 1 infection	4.67098e-15	3.39708e-14	1.49471e-12
KEGG	Hepatitis B	6.09753e-15	4.33602e-14	1.95121e-12
KEGG	Viral carcinogenesis	7.72584e-15	5.3745e-14	2.47227e-12
KEGG	IL-17 signaling	1.77009e-14	1.18006e-13	5.66429e-12
KEGG	AMPK signaling	1.75427e-14	1.1944e-13	5.61366e-12
KEGG	Chagas disease (American trypanosomiasis)	1.97973e-14	1.29288e-13	6.33514e-12
KEGG	Sphingolipid signaling	2.12416e-14	1.35946e-13	6.79731e-12
KEGG	p53 signaling	2.20877e-14	1.38589e-13	7.06806e-12
KEGG	Parkinson disease	2.8242e-14	1.73797e-13	9.03744e-12
KEGG	Hippo signaling	5.70628e-14	3.4453e-13	1.82601e-11
KEGG	NOD-like receptor signaling	6.41837e-14	3.80348e-13	2.05388e-11
KEGG	mRNA surveillance	1.02977e-13	5.8844e-13	3.29526e-11
KEGG	Relaxin signaling	1.01467e-13	5.90353e-13	3.24694e-11
KEGG	Epithelial cell signaling in Helicobacter pylori infection	1.59617e-13	8.80646e-13	5.10774e-11
KEGG	Leukocyte transendothelial migration	1.5841e-13	8.89319e-13	5.06912e-11
KEGG	Insulin signaling	3.37444e-13	1.8302e-12	1.07982e-10
KEGG	Measles	6.51286e-13	3.47353e-12	2.08412e-10
KEGG	Thermogenesis	1.19207e-12	6.15262e-12	3.81462e-10
KEGG	Valine, leucine and isoleucine degradation	1.17638e-12	6.17117e-12	3.76442e-10
KEGG	C-type lectin receptor signaling	1.42868e-12	7.25679e-12	4.57178e-10
KEGG	Rap1 signaling	1.55754e-12	7.7877e-12	4.98413e-10
KEGG	Thyroid hormone signaling	1.68398e-12	8.29036e-12	5.38874e-10
KEGG	Dopaminergic synapse	2.32169e-12	1.12567e-11	7.42941e-10
KEGG	Apelin signaling	2.47002e-12	1.17971e-11	7.90406e-10
KEGG	Oxytocin signaling	2.6818e-12	1.26202e-11	8.58176e-10
KEGG	Mitophagy - animal	2.74691e-12	1.27393e-11	8.79011e-10
KEGG	RNA degradation	6.19081e-12	2.83008e-11	1.98106e-09
KEGG	Retrograde endocannabinoid signaling	6.79835e-12	3.06405e-11	2.17547e-09
KEGG	Wnt signaling	6.79835e-12	3.06405e-11	2.17547e-09
KEGG	Oocyte meiosis	1.18294e-11	5.18549e-11	3.78541e-09
KEGG	Osteoclast differentiation	1.26028e-11	5.44986e-11	4.0329e-09
KEGG	Necroptosis	1.58356e-11	6.75652e-11	5.06739e-09
KEGG	Chronic myeloid leukemia	1.72356e-11	7.25709e-11	5.51539e-09
KEGG	Ras signaling	2.87439e-11	1.19455e-10	9.19805e-09
KEGG	TGF-beta signaling	4.02116e-11	1.64971e-10	1.28677e-08
KEGG	Platelet activation	4.09468e-11	1.6586e-10	1.3103e-08
KEGG	Gastric cancer	6.53884e-11	2.61554e-10	2.09243e-08
KEGG	Nucleotide excision repair	7.38571e-11	2.91781e-10	2.36343e-08
KEGG	Peroxisome	9.1781e-11	3.5817e-10	2.93699e-08
KEGG	Adrenergic signaling in cardiomyocytes	1.04829e-10	4.0416e-10	3.35453e-08
KEGG	Adherens junction	1.13819e-10	4.33596e-10	3.64221e-08
KEGG	Breast cancer	1.27463e-10	4.79861e-10	4.07882e-08
KEGG	Signaling pathways regulating pluripotency of stem cells	2.12645e-10	7.91237e-10	6.80464e-08
KEGG	Phagosome	2.32966e-10	8.56886e-10	7.45491e-08
KEGG	NF-kappa B signaling	2.46919e-10	8.87799e-10	7.90141e-08
KEGG	Parathyroid hormone synthesis, secretion and action	2.45901e-10	8.94185e-10	7.86883e-08
KEGG	Toll-like receptor signaling	3.06904e-10	1.05601e-09	9.82093e-08
KEGG	GnRH signaling	3.04639e-10	1.05961e-09	9.74845e-08
KEGG	JAK-STAT signaling	2.99891e-10	1.06628e-09	9.59651e-08
KEGG	cGMP-PKG signaling	2.99891e-10	1.06628e-09	9.59651e-08
KEGG	Amino sugar and nucleotide sugar metabolism	4.95459e-10	1.68667e-09	1.58547e-07
KEGG	cAMP signaling	7.22371e-10	2.43325e-09	2.31159e-07
KEGG	Th1 and Th2 cell differentiation	1.14241e-09	3.80803e-09	3.65571e-07
KEGG	Base excision repair	1.23709e-09	4.08112e-09	3.95869e-07
KEGG	Spliceosome	1.29823e-09	4.23912e-09	4.15434e-07
KEGG	Adipocytokine signaling	1.44926e-09	4.68448e-09	4.63763e-07
KEGG	HIF-1 signaling	1.67443e-09	5.35818e-09	5.35818e-07
KEGG	Vascular smooth muscle contraction	1.76504e-09	5.59221e-09	5.64813e-07
KEGG	Salmonella infection	2.17791e-09	6.83266e-09	6.96931e-07
KEGG	Progesterone-mediated oocyte maturation	2.62362e-09	8.15105e-09	8.39558e-07
KEGG	B cell receptor signaling	2.76088e-09	8.49502e-09	8.83482e-07
KEGG	Aminoacyl-tRNA biosynthesis	3.60095e-09	1.09743e-08	1.1523e-06
KEGG	Vasopressin-regulated water reabsorption	3.60095e-09	1.09743e-08	1.1523e-06
KEGG	Herpes simplex infection	3.79244e-09	1.13419e-08	1.21358e-06
KEGG	Non-small cell lung cancer	4.00023e-09	1.18525e-08	1.28007e-06
KEGG	DNA replication	4.03846e-09	1.1856e-08	1.29231e-06
KEGG	Oxidative phosphorylation	5.69653e-09	1.64224e-08	1.82289e-06
KEGG	T cell receptor signaling	5.64763e-09	1.64295e-08	1.80724e-06
KEGG	Pertussis	6.23153e-09	1.78044e-08	1.99409e-06
KEGG	Estrogen signaling	6.68176e-09	1.89218e-08	2.13816e-06
KEGG	N-Glycan biosynthesis	6.85183e-09	1.92332e-08	2.19259e-06
KEGG	Inflammatory mediator regulation of TRP channels	7.10316e-09	1.95949e-08	2.27301e-06
KEGG	Toxoplasmosis	7.05143e-09	1.96214e-08	2.25646e-06
KEGG	Proteasome	8.52484e-09	2.33158e-08	2.72795e-06
KEGG	Shigellosis	9.15844e-09	2.46277e-08	2.9307e-06
KEGG	Melanogenesis	9.10229e-09	2.46842e-08	2.91273e-06
KEGG	ErbB signaling	9.9395e-09	2.65053e-08	3.18064e-06
KEGG	Bladder cancer	1.00526e-08	2.65854e-08	3.21683e-06
KEGG	Longevity regulating	1.07163e-08	2.81083e-08	3.42922e-06
KEGG	ECM-receptor interaction	1.23765e-08	3.2199e-08	3.96048e-06
KEGG	Glycolysis / Gluconeogenesis	1.40298e-08	3.62059e-08	4.48954e-06
KEGG	Insulin resistance	1.42798e-08	3.65563e-08	4.56954e-06
KEGG	Fc epsilon RI signaling	1.70942e-08	4.3072e-08	5.47014e-06
KEGG	Notch signaling	1.6982e-08	4.31289e-08	5.43424e-06
KEGG	Fc gamma R-mediated phagocytosis	1.77076e-08	4.4269e-08	5.66643e-06
KEGG	Phospholipase D signaling	1.89303e-08	4.69589e-08	6.0577e-06
KEGG	Citrate cycle (TCA cycle)	2.91319e-08	7.17093e-08	9.32221e-06
KEGG	Cytokine-cytokine receptor interaction	3.00761e-08	7.34683e-08	9.62435e-06
KEGG	SNARE interactions in vesicular transport	3.03532e-08	7.35835e-08	9.71302e-06
KEGG	Phosphatidylinositol signaling system	3.65281e-08	8.78872e-08	1.1689e-05
KEGG	Influenza A	4.79773e-08	1.14573e-07	1.53527e-05
KEGG	Calcium signaling	5.15413e-08	1.22172e-07	1.64932e-05
KEGG	Amoebiasis	5.83782e-08	1.3736e-07	1.8681e-05
KEGG	mTOR signaling	6.12915e-08	1.43163e-07	1.96133e-05
KEGG	Pyruvate metabolism	6.73026e-08	1.56064e-07	2.15368e-05
KEGG	Acute myeloid leukemia	6.86843e-08	1.58122e-07	2.1979e-05
KEGG	Vibrio cholerae infection	7.37645e-08	1.68605e-07	2.36046e-05
KEGG	RNA polymerase	8.34115e-08	1.89303e-07	2.66917e-05
KEGG	Cell adhesion molecules (CAMs)	8.86985e-08	1.99884e-07	2.83835e-05
KEGG	Pancreatic secretion	9.14754e-08	2.047e-07	2.92721e-05
KEGG	Inositol phosphate metabolism	1.0739e-07	2.38644e-07	3.43648e-05
KEGG	Complement and coagulation cascades	1.13981e-07	2.51544e-07	3.64739e-05
KEGG	Cholinergic synapse	1.17399e-07	2.55562e-07	3.75677e-05
KEGG	Fatty acid degradation	1.1721e-07	2.56899e-07	3.75072e-05
KEGG	Th17 cell differentiation	1.26558e-07	2.73639e-07	4.04986e-05
KEGG	Endometrial cancer	1.55569e-07	3.34108e-07	4.97821e-05
KEGG	Protein digestion and absorption	1.85513e-07	3.95761e-07	5.93642e-05
KEGG	Glucagon signaling	2.04e-07	4.32318e-07	6.528e-05
KEGG	Renal cell carcinoma	2.08582e-07	4.3912e-07	6.67462e-05
KEGG	Drug metabolism - other enzymes	2.3444e-07	4.90332e-07	7.50208e-05
KEGG	Circadian entrainment	2.75382e-07	5.72222e-07	8.81222e-05
KEGG	Glioma	2.81936e-07	5.82061e-07	9.02195e-05
KEGG	Ribosome biogenesis in eukaryotes	3.78322e-07	7.76045e-07	0.000121063
KEGG	Thyroid cancer	4.31593e-07	8.7968e-07	0.00013811
KEGG	Glutamatergic synapse	4.72483e-07	9.56928e-07	0.000151195
KEGG	Prion diseases	4.84218e-07	9.74527e-07	0.00015495
KEGG	Renin secretion	5.52015e-07	1.10403e-06	0.000176645
KEGG	Prolactin signaling	5.86567e-07	1.15865e-06	0.000187701
KEGG	Mismatch repair	5.85307e-07	1.16334e-06	0.000187298
KEGG	Gastric acid secretion	6.02333e-07	1.18249e-06	0.000192747
KEGG	Choline metabolism in cancer	6.26534e-07	1.22251e-06	0.000200491
KEGG	Glutathione metabolism	7.6203e-07	1.47788e-06	0.00024385
KEGG	Tryptophan metabolism	8.0088e-07	1.54387e-06	0.000256282
KEGG	Propanoate metabolism	1.37129e-06	2.62762e-06	0.000438813
KEGG	Longevity regulating pathway - multiple species	1.45474e-06	2.77093e-06	0.000465517
KEGG	Long-term potentiation	1.52104e-06	2.88008e-06	0.000486733
KEGG	Central carbon metabolism in cancer	1.91564e-06	3.60591e-06	0.000613005
KEGG	GABAergic synapse	2.07685e-06	3.8865e-06	0.000664592
KEGG	Gap junction	2.07685e-06	3.8865e-06	0.000664592
KEGG	VEGF signaling	2.28064e-06	4.21852e-06	0.000729805
KEGG	Synaptic vesicle cycle	2.41141e-06	4.43478e-06	0.000771651
KEGG	Bacterial invasion of epithelial cells	3.78461e-06	6.88111e-06	0.00121108
KEGG	Thyroid hormone synthesis	3.78461e-06	6.88111e-06	0.00121108
KEGG	Ferroptosis	3.78056e-06	6.91302e-06	0.00120978
KEGG	Endocrine and other factor-regulated calcium reabsorption	3.8836e-06	6.98175e-06	0.00124275
KEGG	Ribosome	4.09144e-06	7.31431e-06	0.00130926
KEGG	Glycosylphosphatidylinositol (GPI)-anchor biosynthesis	4.60254e-06	8.18229e-06	0.00147281
KEGG	Arrhythmogenic right ventricular cardiomyopathy (ARVC)	4.80372e-06	8.4461e-06	0.00153719
KEGG	Protein export	4.78651e-06	8.46234e-06	0.00153168
KEGG	Cholesterol metabolism	5.53385e-06	9.67668e-06	0.00177083
KEGG	Aldosterone synthesis and secretion	5.89388e-06	1.02502e-05	0.00188604
KEGG	Hematopoietic cell lineage	5.89388e-06	1.02502e-05	0.00188604
KEGG	Pathogenic Escherichia coli infection	6.02062e-06	1.03581e-05	0.0019266
KEGG	Autophagy - other	7.47877e-06	1.27979e-05	0.00239321
KEGG	Cytosolic DNA-sensing	7.92995e-06	1.34264e-05	0.00253758
KEGG	Viral myocarditis	7.88816e-06	1.34267e-05	0.00252421
KEGG	Amyotrophic lateral sclerosis (ALS)	9.47034e-06	1.595e-05	0.00303051
KEGG	Cortisol synthesis and secretion	1.2473e-05	2.08972e-05	0.00399136
KEGG	Serotonergic synapse	1.33949e-05	2.23248e-05	0.00428637
KEGG	Apoptosis - multiple species	1.52389e-05	2.52666e-05	0.00487645
KEGG	RIG-I-like receptor signaling	1.80986e-05	2.95487e-05	0.00579155
KEGG	Galactose metabolism	1.80983e-05	2.98529e-05	0.00579146
KEGG	beta-Alanine metabolism	1.80983e-05	2.98529e-05	0.00579146
KEGG	Tyrosine metabolism	2.4246e-05	3.93844e-05	0.00775872
KEGG	PPAR signaling	3.13245e-05	5.06255e-05	0.0100238
KEGG	Insulin secretion	3.54926e-05	5.70735e-05	0.0113576
KEGG	Lysine degradation	3.97034e-05	6.35254e-05	0.0127051
KEGG	Melanoma	3.991e-05	6.35383e-05	0.0127712
KEGG	Pentose phosphate	4.30952e-05	6.82696e-05	0.0137905
KEGG	Cardiac muscle contraction	5.14301e-05	8.10721e-05	0.0164576
KEGG	Leishmaniasis	5.80669e-05	9.10853e-05	0.0185814
KEGG	Legionellosis	6.43089e-05	0.000100385	0.0205788
KEGG	Basal transcription factors	6.59387e-05	0.000102429	0.0211004
KEGG	Bile secretion	7.39989e-05	0.000114394	0.0236796
KEGG	Fanconi anemia	8.1867e-05	0.000125347	0.0261974
KEGG	Terpenoid backbone biosynthesis	8.15528e-05	0.000125466	0.0260969
KEGG	Malaria	8.4211e-05	0.000128322	0.0269475
KEGG	Glycerophospholipid metabolism	8.78731e-05	0.000133267	0.0281194
KEGG	Morphine addiction	0.000103657	0.000156463	0.0331702
KEGG	Mineral absorption	0.000104243	0.000156609	0.0333578
KEGG	Glycosphingolipid biosynthesis - lacto and neolacto series	0.000122226	0.000182768	0.0391123
KEGG	Regulation of lipolysis in adipocytes	0.000125724	0.000187124	0.0402317
KEGG	Dilated cardiomyopathy (DCM)	0.000131271	0.000194476	0.0420067
KEGG	Rheumatoid arthritis	0.000131271	0.000194476	0.0420067
KEGG	Cocaine addiction	0.000132763	0.000194881	0.0424842
KEGG	Proximal tubule bicarbonate reclamation	0.000174833	0.000255464	0.0559466
KEGG	Salivary secretion	0.000177718	0.000258499	0.0568698
KEGG	Circadian rhythm	0.000187474	0.000271456	0.0599917
KEGG	Glyoxylate and dicarboxylate metabolism	0.000187474	0.000271456	0.0599917
KEGG	Basal cell carcinoma	0.000195758	0.000280908	0.0626426
KEGG	Glycosaminoglycan degradation	0.000236568	0.000337954	0.0757018
KEGG	Glycosaminoglycan biosynthesis - heparan sulfate / heparin	0.000347842	0.000494709	0.111309
KEGG	Homologous recombination	0.000350119	0.000495744	0.112038
KEGG	Starch and sucrose metabolism	0.000352023	0.000496244	0.112647
KEGG	Arachidonic acid metabolism	0.00035797	0.000502414	0.11455
KEGG	Amphetamine addiction	0.000434384	0.000606999	0.139003
KEGG	Cysteine and methionine metabolism	0.000505928	0.0007039	0.161897
KEGG	Natural killer cell mediated cytotoxicity	0.000557618	0.000772458	0.178438
KEGG	Aldosterone-regulated sodium reabsorption	0.000569393	0.00078537	0.182206
KEGG	Glycine, serine and threonine metabolism	0.000698175	0.000958867	0.223416
KEGG	Alanine, aspartate and glutamate metabolism	0.0007264	0.000993368	0.232448
KEGG	Ovarian steroidogenesis	0.000750438	0.00102187	0.24014
KEGG	Hedgehog signaling	0.000961409	0.00130361	0.307651
KEGG	Arginine and proline metabolism	0.00109124	0.0014734	0.349197
KEGG	Folate biosynthesis	0.00114625	0.00154118	0.3668
KEGG	One carbon pool by folate	0.0012177	0.00163039	0.389664
KEGG	Pantothenate and CoA biosynthesis	0.0012177	0.00163039	0.389664
KEGG	Hypertrophic cardiomyopathy (HCM)	0.00131065	0.00174028	0.419408
KEGG	Nicotinate and nicotinamide metabolism	0.00151011	0.00199684	0.483235
KEGG	Other types of O-glycan biosynthesis	0.00182105	0.00239809	0.582736
KEGG	Non-homologous end-joining	0.00205906	0.00270041	0.658899
KEGG	Glycosaminoglycan biosynthesis - chondroitin sulfate / dermatan sulfate	0.00228562	0.0029853	0.731398
KEGG	Metabolism of xenobiotics by cytochrome P450	0.00251247	0.00326825	0.80399
KEGG	Other glycan degradation	0.00285609	0.0037002	0.913949
KEGG	Butanoate metabolism	0.00310578	0.00400746	0.99385
KEGG	Hippo signaling pathway - multiple species	0.00310578	0.00400746	0.99385
KEGG	Chemical carcinogenesis	0.00338651	0.00433473	1
KEGG	Sphingolipid metabolism	0.00357051	0.00453398	1
KEGG	Glycerolipid metabolism	0.00356733	0.00454799	1
KEGG	Maturity onset diabetes of the young	0.00399493	0.00505288	1
KEGG	Porphyrin and chlorophyll metabolism	0.00419851	0.00528946	1
KEGG	Glycosaminoglycan biosynthesis - keratan sulfate	0.00436144	0.00547318	1
KEGG	Long-term depression	0.00451374	0.00564217	1
KEGG	Steroid biosynthesis	0.00510894	0.00636133	1
KEGG	alpha-Linolenic acid metabolism	0.00514409	0.00638027	1
KEGG	Type II diabetes mellitus	0.00626175	0.00773653	1
KEGG	Nitrogen metabolism	0.00650372	0.00800458	1
KEGG	Selenocompound metabolism	0.00650372	0.00800458	1
KEGG	Riboflavin metabolism	0.00705591	0.00861791	1
KEGG	Mucin type O-glycan biosynthesis	0.00721405	0.00877755	1
KEGG	ABC transporters	0.00799756	0.00969401	1
KEGG	Drug metabolism - cytochrome P450	0.00806675	0.00974098	1
KEGG	Fructose and mannose metabolism	0.00811148	0.00975817	1
KEGG	Glycosphingolipid biosynthesis - globo and isoglobo series	0.00825934	0.00989883	1
KEGG	Primary immunodeficiency	0.00891003	0.0106388	1
KEGG	Linoleic acid metabolism	0.0093363	0.0111064	1
KEGG	Inflammatory bowel disease (IBD)	0.00994603	0.0117879	1
KEGG	Alcoholism	0.0104594	0.0122601	1
KEGG	Histidine metabolism	0.0104392	0.0123267	1
KEGG	Renin-angiotensin system	0.0104392	0.0123267	1
KEGG	African trypanosomiasis	0.0114742	0.0134005	1
KEGG	Ubiquinone and other terpenoid-quinone biosynthesis	0.0131156	0.0152618	1
KEGG	Ether lipid metabolism	0.0141858	0.0164473	1
KEGG	Sulfur metabolism	0.0162512	0.0187739	1
KEGG	Fat digestion and absorption	0.0174227	0.0200549	1
KEGG	Biosynthesis of unsaturated fatty acids	0.0175718	0.020154	1
KEGG	Intestinal immune network for IgA production	0.0184452	0.0210802	1
KEGG	Phenylalanine metabolism	0.0231105	0.026318	1
KEGG	Arginine biosynthesis	0.0267985	0.0304096	1
KEGG	Mannose type O-glycan biosynthesis	0.0297274	0.033614	1
KEGG	Thiamine metabolism	0.0303271	0.0341714	1
KEGG	Synthesis and degradation of ketone bodies	0.0312593	0.0350982	1
KEGG	Carbohydrate digestion and absorption	0.037314	0.0417499	1
KEGG	Vitamin digestion and absorption	0.0415669	0.0463464	1
KEGG	Retinol metabolism	0.0424847	0.0472052	1
KEGG	Collecting duct acid secretion	0.0435702	0.0482438	1
KEGG	Fatty acid elongation	0.0449859	0.0496396	1
		290

## Sheet: COAD_Enrich
Pathway Source	Pathway Name	p-value	q-value (FDR: BH-method)	q-value (Bonferroni)
KEGG	Hepatitis B	8.51267e-08	1.22157e-05	2.44314e-05
KEGG	Hippo signaling	5.88766e-08	1.68976e-05	1.68976e-05
KEGG	Pathways in cancer	3.26492e-07	3.12344e-05	9.37032e-05
KEGG	MicroRNAs in cancer	6.69258e-07	3.84154e-05	0.000192077
KEGG	Cell cycle	6.19027e-07	4.44152e-05	0.000177661
KEGG	PI3K-Akt signaling	1.02731e-06	4.91397e-05	0.000294838
KEGG	Gastric cancer	2.41e-06	8.64587e-05	0.00069167
KEGG	Cellular senescence	2.18602e-06	8.96268e-05	0.000627388
KEGG	Human papillomavirus infection	3.3384e-06	0.000106458	0.000958121
KEGG	Small cell lung cancer	4.91444e-06	0.000141044	0.00141044
KEGG	TGF-beta signaling	6.84515e-06	0.000178596	0.00196456
KEGG	Breast cancer	8.31908e-06	0.000198965	0.00238758
KEGG	Endocytosis	2.03916e-05	0.000450184	0.00585239
KEGG	Human T-cell leukemia virus 1 infection	3.13636e-05	0.000642954	0.00900135
KEGG	Adherens junction	0.000148871	0.0028484	0.042726
KEGG	p53 signaling	0.000148871	0.0028484	0.042726
KEGG	NF-kappa B signaling	0.000426199	0.00679551	0.122319
KEGG	Epithelial cell signaling in Helicobacter pylori infection	0.000406204	0.00685768	0.116581
KEGG	Nitrogen metabolism	0.000456999	0.00690309	0.131159
KEGG	FoxO signaling	0.000847084	0.0115768	0.243113
KEGG	Necroptosis	0.000841778	0.0120795	0.24159
KEGG	Neuroactive ligand-receptor interaction	0.000997962	0.0130189	0.286415
KEGG	Wnt signaling	0.0010549	0.0131633	0.302756
KEGG	Parathyroid hormone synthesis, secretion and action	0.00126253	0.0144938	0.362346
KEGG	Complement and coagulation cascades	0.00134894	0.0148902	0.387146
KEGG	RNA degradation	0.00134894	0.0148902	0.387146
KEGG	Calcium signaling	0.00150788	0.0149228	0.432762
KEGG	RNA transport	0.00124808	0.014925	0.358199
KEGG	Viral carcinogenesis	0.00148728	0.0152446	0.426849
KEGG	Tight junction	0.00160227	0.0153284	0.459851
KEGG	Hepatitis C	0.0016827	0.0155785	0.482935
KEGG	Prostate cancer	0.00196	0.0175788	0.56252
KEGG	AGE-RAGE signaling pathway in diabetic complications	0.00230905	0.0200817	0.662697
KEGG	Melanoma	0.00253045	0.02136	0.726239
KEGG	Pancreatic cancer	0.00335314	0.0274957	0.962351
KEGG	Maturity onset diabetes of the young	0.00358591	0.027815	1
KEGG	Transcriptional misregulation in cancer	0.00357219	0.0284783	1
KEGG	Kaposi sarcoma-associated herpesvirus infection	0.0039718	0.0284977	1
KEGG	Cholesterol metabolism	0.00394715	0.029047	1
KEGG	mRNA surveillance	0.00389686	0.0294315	1
KEGG	Lysosome	0.00442447	0.0295308	1
KEGG	Rap1 signaling	0.0046361	0.029568	1
KEGG	Collecting duct acid secretion	0.00425578	0.0297905	1
KEGG	MAPK signaling	0.00460003	0.0300047	1
KEGG	Amyotrophic lateral sclerosis (ALS)	0.00441798	0.0301895	1
KEGG	Axon guidance	0.00509656	0.0317981	1
KEGG	Amoebiasis	0.00530361	0.0323859	1
KEGG	Autophagy - animal	0.00608009	0.035612	1
KEGG	Bladder cancer	0.00598905	0.0358095	1
KEGG	cGMP-PKG signaling	0.00654621	0.0375752	1
KEGG	Colorectal cancer	0.00828663	0.0457358	1
KEGG	Oxidative phosphorylation	0.00819182	0.0460991	1
		52

## Sheet: GSE41011_COAD_Inters
51 common elements in "41011" and "COAD":
Pathways in cancer
Human papillomavirus infection
Endocytosis
Lysosome
MicroRNAs in cancer
Human T-cell leukemia virus 1 infection
MAPK signaling
PI3K-Akt signaling
Cell cycle
Autophagy - animal
Cellular senescence
Axon guidance
Hepatitis C
Small cell lung cancer
Transcriptional misregulation in cancer
Tight junction
RNA transport
Kaposi sarcoma-associated herpesvirus infection
FoxO signaling
Colorectal cancer
AGE-RAGE signaling pathway in diabetic complications
Prostate cancer
Pancreatic cancer
Hepatitis B
Viral carcinogenesis
p53 signaling
Hippo signaling
mRNA surveillance
Epithelial cell signaling in Helicobacter pylori infection
Rap1 signaling
RNA degradation
Wnt signaling
Necroptosis
TGF-beta signaling
Gastric cancer
Adherens junction
Breast cancer
NF-kappa B signaling
Parathyroid hormone synthesis, secretion and action
cGMP-PKG signaling
Oxidative phosphorylation
Bladder cancer
Calcium signaling
Amoebiasis
Complement and coagulation cascades
Cholesterol metabolism
Amyotrophic lateral sclerosis (ALS)
Melanoma
Maturity onset diabetes of the young
Nitrogen metabolism
Collecting duct acid secretion

## Sheet: GSE63678_Enrich
Pathway Source	Pathway Name	p-value	q-value (FDR: BH-method)	q-value (Bonferroni)
KEGG	Cell cycle	2.00023e-13	5.62065e-11	5.62065e-11
KEGG	Alzheimer disease	2.46553e-10	3.46407e-08	6.92814e-08
KEGG	Oocyte meiosis	4.84948e-10	4.54235e-08	1.3627e-07
KEGG	Parkinson disease	7.4622e-09	5.2422e-07	2.09688e-06
KEGG	Non-alcoholic fatty liver disease (NAFLD)	9.13538e-08	5.13408e-06	2.56704e-05
KEGG	p53 signaling	1.71369e-07	8.02578e-06	4.81547e-05
KEGG	Progesterone-mediated oocyte maturation	8.89862e-07	3.57216e-05	0.000250051
KEGG	Cellular senescence	1.31033e-06	4.60253e-05	0.000368203
KEGG	Pathogenic Escherichia coli infection	4.32599e-06	0.000135067	0.0012156
KEGG	Huntington disease	4.98264e-06	0.000140012	0.00140012
KEGG	Human T-cell leukemia virus 1 infection	8.79925e-06	0.000224781	0.00247259
KEGG	Oxidative phosphorylation	9.7296e-06	0.000227835	0.00273402
KEGG	Apoptosis	1.27737e-05	0.000276108	0.00358941
KEGG	Mineral absorption	1.68972e-05	0.000316541	0.00474811
KEGG	Cardiac muscle contraction	1.84225e-05	0.000323545	0.00517672
KEGG	Human immunodeficiency virus 1 infection	1.68333e-05	0.000337868	0.00473016
KEGG	Tight junction	4.82705e-05	0.000753556	0.013564
KEGG	Proteasome	4.72944e-05	0.000781749	0.0132897
KEGG	AMPK signaling	5.81619e-05	0.000817175	0.0163435
KEGG	Thermogenesis	5.59055e-05	0.000826813	0.0157094
KEGG	Hepatitis B	0.000100314	0.0013423	0.0281882
KEGG	Autophagy - animal	0.000113443	0.00144898	0.0318775
KEGG	PI3K-Akt signaling	0.000143034	0.0017475	0.0401926
KEGG	Glycolysis / Gluconeogenesis	0.000175209	0.00205141	0.0492337
KEGG	Hippo signaling	0.000191462	0.00215203	0.0538008
KEGG	Glutathione metabolism	0.000234258	0.00253179	0.0658265
KEGG	Cysteine and methionine metabolism	0.000443072	0.00461123	0.124503
KEGG	Human papillomavirus infection	0.000530259	0.00532153	0.149003
KEGG	Pyruvate metabolism	0.000953258	0.00923674	0.267865
KEGG	Hepatocellular carcinoma	0.00147709	0.0138354	0.415062
KEGG	mRNA surveillance	0.00152932	0.0138625	0.429739
KEGG	mTOR signaling	0.00176297	0.0141541	0.495395
KEGG	Citrate cycle (TCA cycle)	0.00176109	0.0145549	0.494866
KEGG	Regulation of actin cytoskeleton	0.00172588	0.0146961	0.484972
KEGG	Pancreatic cancer	0.00170358	0.0149596	0.478706
KEGG	Pathways in cancer	0.00211087	0.0164765	0.593154
KEGG	Drug metabolism - other enzymes	0.00219181	0.0166459	0.615899
KEGG	Hepatitis C	0.00232341	0.017181	0.652878
KEGG	Insulin signaling	0.00262758	0.0189321	0.73835
KEGG	Ubiquitin mediated proteolysis	0.00262758	0.0189321	0.73835
KEGG	C-type lectin receptor signaling	0.00382664	0.0250066	1
KEGG	Long-term potentiation	0.00368525	0.0252574	1
KEGG	RNA transport	0.0040741	0.0254405	1
KEGG	Kaposi sarcoma-associated herpesvirus infection	0.00380341	0.0254466	1
KEGG	Colorectal cancer	0.00403996	0.0258007	1
KEGG	Insulin resistance	0.00462095	0.028228	1
KEGG	MicroRNAs in cancer	0.00499523	0.0298651	1
KEGG	Melanoma	0.00550169	0.0315505	1
KEGG	FoxO signaling	0.00547851	0.0320721	1
KEGG	Spliceosome	0.00609181	0.034236	1
KEGG	Small cell lung cancer	0.00648324	0.0343734	1
KEGG	Focal adhesion	0.00640608	0.0352962	1
KEGG	Proteoglycans in cancer	0.00640608	0.0352962	1
KEGG	Epstein-Barr virus infection	0.00695231	0.0361778	1
KEGG	Chronic myeloid leukemia	0.00738201	0.0370419	1
KEGG	Endometrial cancer	0.00736929	0.0376504	1
KEGG	Porphyrin and chlorophyll metabolism	0.00785631	0.0387302	1
KEGG	Signaling pathways regulating pluripotency of stem cells	0.00825698	0.0400036	1
KEGG	Neurotrophin signaling	0.00914762	0.0435675	1
KEGG	HIF-1 signaling	0.00991029	0.0464132	1
		60

## Sheet: UCEC_Enrich
Pathway Source	Pathway Name	p-value	q-value (FDR: BH-method)	q-value (Bonferroni)
KEGG	Olfactory transduction	2.43206e-17	7.34482e-15	7.34482e-15
KEGG	Non-alcoholic fatty liver disease (NAFLD)	8.85384e-10	1.33693e-07	2.67386e-07
KEGG	Thermogenesis	2.0708e-07	2.08461e-05	6.25382e-05
KEGG	Osteoclast differentiation	2.85523e-07	2.1557e-05	8.62279e-05
KEGG	Platelet activation	1.72965e-06	0.000104471	0.000522354
KEGG	Thyroid hormone signaling	2.45789e-06	0.00010604	0.000742283
KEGG	Small cell lung cancer	2.9912e-06	0.000112918	0.000903342
KEGG	PI3K-Akt signaling	2.29383e-06	0.000115456	0.000692737
KEGG	Pathways in cancer	5.26708e-06	0.00017674	0.00159066
KEGG	Fc gamma R-mediated phagocytosis	7.01167e-06	0.000211752	0.00211752
KEGG	Human papillomavirus infection	9.64923e-06	0.000224159	0.00291407
KEGG	Ribosome	8.34072e-06	0.000228991	0.0025189
KEGG	Tight junction	9.43161e-06	0.000237362	0.00284835
KEGG	Insulin secretion	1.1625e-05	0.000250768	0.00351075
KEGG	Cardiac muscle contraction	1.35431e-05	0.000272668	0.00409002
KEGG	Insulin resistance	2.73168e-05	0.000515605	0.00824967
KEGG	Alzheimer disease	2.95814e-05	0.000525505	0.00893358
KEGG	Natural killer cell mediated cytotoxicity	4.84606e-05	0.000770268	0.0146351
KEGG	Breast cancer	4.65638e-05	0.000781237	0.0140623
KEGG	cAMP signaling	6.93198e-05	0.000951572	0.0209346
KEGG	Focal adhesion	6.31886e-05	0.000954148	0.019083
KEGG	Oxidative phosphorylation	7.79051e-05	0.000980306	0.0235273
KEGG	Parkinson disease	7.55218e-05	0.000991634	0.0228076
KEGG	Human T-cell leukemia virus 1 infection	6.92429e-05	0.000995779	0.0209114
KEGG	Carbohydrate digestion and absorption	0.000121822	0.00147161	0.0367902
KEGG	Hepatocellular carcinoma	0.000139354	0.00161865	0.0420849
KEGG	MicroRNAs in cancer	0.000159742	0.00172293	0.0482421
KEGG	Measles	0.000177455	0.00172876	0.0535914
KEGG	Cholinergic synapse	0.000167153	0.0017407	0.0504802
KEGG	Leukocyte transendothelial migration	0.000167153	0.0017407	0.0504802
KEGG	FoxO signaling	0.000158888	0.00177719	0.0479842
KEGG	cGMP-PKG signaling	0.000221104	0.00208667	0.0667734
KEGG	Prostate cancer	0.000242868	0.00222261	0.0733461
KEGG	Adrenergic signaling in cardiomyocytes	0.000255823	0.00227231	0.0772585
KEGG	Sphingolipid signaling	0.000335	0.00289057	0.10117
KEGG	Gastric cancer	0.000379369	0.00301499	0.114569
KEGG	MAPK signaling	0.000372334	0.00303905	0.112445
KEGG	Acute myeloid leukemia	0.000399543	0.0030939	0.120662
KEGG	Signaling pathways regulating pluripotency of stem cells	0.00037002	0.00310406	0.111746
KEGG	ErbB signaling	0.000450024	0.00339768	0.135907
KEGG	Lysosome	0.000572072	0.00401781	0.172766
KEGG	JAK-STAT signaling	0.000551351	0.00406117	0.166508
KEGG	Huntington disease	0.000566099	0.00407052	0.170962
KEGG	Phospholipase D signaling	0.000660729	0.004535	0.19954
KEGG	B cell receptor signaling	0.000722064	0.00484585	0.218063
KEGG	Type II diabetes mellitus	0.000821073	0.00516592	0.247964
KEGG	Ras signaling	0.000838498	0.00516789	0.253226
KEGG	Apoptosis	0.000789508	0.00518329	0.238431
KEGG	Insulin signaling	0.000867283	0.00523839	0.261919
KEGG	Regulation of lipolysis in adipocytes	0.000818019	0.00525621	0.247042
KEGG	Pyrimidine metabolism	0.000923136	0.00546641	0.278787
KEGG	Endocrine and other factor-regulated calcium reabsorption	0.000980928	0.00548593	0.29624
KEGG	Fluid shear stress and atherosclerosis	0.000951569	0.00552642	0.287374
KEGG	Epstein-Barr virus infection	0.000971181	0.0055339	0.293297
KEGG	T cell receptor signaling	0.0010317	0.00566497	0.311573
KEGG	Cellular senescence	0.0011116	0.0059947	0.335703
KEGG	Central carbon metabolism in cancer	0.00120724	0.00617943	0.364586
KEGG	Influenza A	0.00117466	0.00622364	0.354747
KEGG	Purine metabolism	0.00117466	0.00622364	0.354747
KEGG	Fc epsilon RI signaling	0.00138673	0.00697987	0.418792
KEGG	Transcriptional misregulation in cancer	0.00142813	0.00707041	0.431295
KEGG	Cytokine-cytokine receptor interaction	0.00146416	0.00713188	0.442176
KEGG	VEGF signaling	0.00152009	0.00728678	0.459067
KEGG	Cholesterol metabolism	0.00161928	0.00764098	0.489023
KEGG	Proteoglycans in cancer	0.00182014	0.00845665	0.549682
KEGG	Endocytosis	0.00197723	0.00904733	0.597123
KEGG	Prolactin signaling	0.00233891	0.0100907	0.706351
KEGG	Regulation of actin cytoskeleton	0.00225697	0.0101732	0.681605
KEGG	Alcoholism	0.00232854	0.0101916	0.703219
KEGG	Choline metabolism in cancer	0.00230012	0.0102152	0.694636
KEGG	Longevity regulating pathway - multiple species	0.00265256	0.0112827	0.801073
KEGG	Phagosome	0.00286683	0.0116998	0.865783
KEGG	Relaxin signaling	0.00280172	0.0117517	0.846119
KEGG	Vascular smooth muscle contraction	0.00284216	0.011758	0.858332
KEGG	Rap1 signaling	0.00312627	0.0125884	0.944134
KEGG	Chagas disease (American trypanosomiasis)	0.00341726	0.0135791	1
KEGG	Cell adhesion molecules (CAMs)	0.00348009	0.0136492	1
KEGG	RNA polymerase	0.00392983	0.0152155	1
KEGG	C-type lectin receptor signaling	0.00412381	0.0157644	1
KEGG	Gastric acid secretion	0.00421656	0.0159175	1
KEGG	Tuberculosis	0.00431066	0.0160718	1
KEGG	Non-small cell lung cancer	0.0043848	0.0161489	1
KEGG	Viral carcinogenesis	0.00460204	0.0163508	1
KEGG	Amoebiasis	0.00450952	0.0164081	1
KEGG	Estrogen signaling	0.00457256	0.0164394	1
KEGG	Chronic myeloid leukemia	0.00470763	0.0165314	1
KEGG	Endometrial cancer	0.00504922	0.0169429	1
KEGG	Aldosterone synthesis and secretion	0.00496058	0.0172195	1
KEGG	Hematopoietic cell lineage	0.00496058	0.0172195	1
KEGG	Pancreatic secretion	0.00496058	0.0172195	1
KEGG	Renal cell carcinoma	0.00553683	0.018375	1
KEGG	mTOR signaling	0.0058878	0.0193273	1
KEGG	Neurotrophin signaling	0.00624016	0.0202637	1
KEGG	Dilated cardiomyopathy (DCM)	0.00656003	0.0206368	1
KEGG	Longevity regulating	0.00656003	0.0206368	1
KEGG	Axon guidance	0.00683969	0.0206559	1
KEGG	Calcium signaling	0.00680316	0.0207531	1
KEGG	AMPK signaling	0.0067629	0.0208408	1
KEGG	TNF signaling	0.00698529	0.0208867	1
KEGG	Amyotrophic lateral sclerosis (ALS)	0.00654454	0.0210261	1
KEGG	Mineral absorption	0.00654454	0.0210261	1
KEGG	Hippo signaling	0.00727097	0.0213188	1
KEGG	Protein digestion and absorption	0.00720752	0.0213399	1
KEGG	Systemic lupus erythematosus	0.0075564	0.0219426	1
KEGG	Cushing syndrome	0.00778677	0.0223962	1
KEGG	Human immunodeficiency virus 1 infection	0.00789951	0.0225062	1
KEGG	Hepatitis C	0.00833167	0.0232978	1
KEGG	Hepatitis B	0.00827117	0.0233448	1
KEGG	Th1 and Th2 cell differentiation	0.00865413	0.0239775	1
KEGG	Toxoplasmosis	0.00891875	0.024486	1
KEGG	Cytosolic DNA-sensing	0.00913067	0.024842	1
KEGG	Synaptic vesicle cycle	0.00913067	0.024842	1
KEGG	IL-17 signaling	0.00945795	0.025277	1
KEGG	Proteasome	0.00968065	0.0254222	1
KEGG	Human cytomegalovirus infection	0.0096135	0.0254673	1
KEGG	Apelin signaling	0.0100942	0.0262797	1
KEGG	Cortisol synthesis and secretion	0.0101862	0.0262926	1
KEGG	Bacterial invasion of epithelial cells	0.0104636	0.0267797	1
KEGG	Inositol phosphate metabolism	0.0104636	0.0267797	1
KEGG	Aldosterone-regulated sodium reabsorption	0.0108202	0.0272308	1
KEGG	Renin secretion	0.0113317	0.0282824	1
KEGG	Pancreatic cancer	0.0115374	0.0285598	1
KEGG	Th17 cell differentiation	0.0127368	0.0312725	1
KEGG	Riboflavin metabolism	0.0132953	0.0323805	1
KEGG	Notch signaling	0.0141883	0.0342789	1
KEGG	Drug metabolism - other enzymes	0.0152661	0.0363021	1
KEGG	Dopaminergic synapse	0.0151675	0.0363538	1
KEGG	Proximal tubule bicarbonate reclamation	0.0168468	0.0391364	1
KEGG	RNA transport	0.0165963	0.0391569	1
KEGG	HIF-1 signaling	0.0168363	0.0394152	1
KEGG	Bile secretion	0.0203573	0.0469306	1
KEGG	Neuroactive ligand-receptor interaction	0.0210832	0.0482358	1
KEGG	ECM-receptor interaction	0.0215612	0.0489585	1

## Sheet: GSE63678_UCEC_Inters
41 common elements in "63678" and "UCEC":
Alzheimer disease
Parkinson disease
Non-alcoholic fatty liver disease (NAFLD)
Cellular senescence
Huntington disease
Human T-cell leukemia virus 1 infection
Oxidative phosphorylation
Apoptosis
Mineral absorption
Cardiac muscle contraction
Human immunodeficiency virus 1 infection
Tight junction
Proteasome
AMPK signaling
Thermogenesis
Hepatitis B
PI3K-Akt signaling
Hippo signaling
Human papillomavirus infection
Hepatocellular carcinoma
mTOR signaling
Regulation of actin cytoskeleton
Pancreatic cancer
Pathways in cancer
Drug metabolism - other enzymes
Hepatitis C
Insulin signaling
C-type lectin receptor signaling
RNA transport
Insulin resistance
MicroRNAs in cancer
FoxO signaling
Small cell lung cancer
Focal adhesion
Proteoglycans in cancer
Epstein-Barr virus infection
Chronic myeloid leukemia
Endometrial cancer
Signaling pathways regulating pluripotency of stem cells
Neurotrophin signaling
HIF-1 signaling

## Sheet: GSE65144_Enrich
Pathway Source	Pathway Name	p-value	q-value (FDR: BH-method)	q-value (Bonferroni)
KEGG	MicroRNAs in cancer	1.94893e-29	6.17811e-27	6.17811e-27
KEGG	Endocytosis	2.82101e-27	4.4713e-25	8.9426e-25
KEGG	Pathways in cancer	2.70983e-25	2.86339e-23	8.59016e-23
KEGG	PI3K-Akt signaling	4.66625e-24	3.698e-22	1.4792e-21
KEGG	Proteoglycans in cancer	1.0378e-21	6.57965e-20	3.28983e-19
KEGG	Cell cycle	1.12485e-20	5.94296e-19	3.56577e-18
KEGG	Human papillomavirus infection	5.75867e-19	2.60785e-17	1.8255e-16
KEGG	Focal adhesion	5.79163e-17	2.29493e-15	1.83595e-14
KEGG	Tight junction	1.19404e-16	4.20567e-15	3.78511e-14
KEGG	MAPK signaling	7.27903e-16	2.30745e-14	2.30745e-13
KEGG	Phagosome	2.28848e-15	6.59498e-14	7.25448e-13
KEGG	Hippo signaling	5.29675e-15	1.39922e-13	1.67907e-12
KEGG	Regulation of actin cytoskeleton	8.48887e-15	1.92212e-13	2.69097e-12
KEGG	Axon guidance	8.10247e-15	1.97576e-13	2.56848e-12
KEGG	FoxO signaling	1.76815e-14	3.73669e-13	5.60504e-12
KEGG	Autophagy - animal	3.0034e-14	5.95049e-13	9.52078e-12
KEGG	Neurotrophin signaling	1.59225e-13	2.96908e-12	5.04743e-11
KEGG	Salmonella infection	2.1806e-13	3.84028e-12	6.9125e-11
KEGG	Cellular senescence	2.98169e-13	4.97471e-12	9.45196e-11
KEGG	AGE-RAGE signaling pathway in diabetic complications	3.749e-13	5.6592e-12	1.18843e-10
KEGG	Rap1 signaling	3.67338e-13	5.82231e-12	1.16446e-10
KEGG	Human T-cell leukemia virus 1 infection	7.11574e-13	1.02531e-11	2.25569e-10
KEGG	Osteoclast differentiation	1.25708e-12	1.73258e-11	3.98494e-10
KEGG	TGF-beta signaling	1.89631e-12	2.50471e-11	6.0113e-10
KEGG	Hepatocellular carcinoma	3.48897e-12	4.42401e-11	1.106e-09
KEGG	Relaxin signaling	4.20605e-12	5.12815e-11	1.33332e-09
KEGG	RNA transport	8.02904e-12	9.42669e-11	2.54521e-09
KEGG	Kaposi sarcoma-associated herpesvirus infection	1.60802e-11	1.82051e-10	5.09742e-09
KEGG	Protein processing in endoplasmic reticulum	1.83164e-11	2.00217e-10	5.8063e-09
KEGG	Hepatitis C	2.18535e-11	2.30919e-10	6.92756e-09
KEGG	Renal cell carcinoma	2.48485e-11	2.54096e-10	7.87697e-09
KEGG	Tuberculosis	3.76635e-11	3.73104e-10	1.19393e-08
KEGG	Protein digestion and absorption	3.93359e-11	3.77863e-10	1.24695e-08
KEGG	Transcriptional misregulation in cancer	7.62951e-11	7.1134e-10	2.41855e-08
KEGG	Fluid shear stress and atherosclerosis	8.11763e-11	7.35225e-10	2.57329e-08
KEGG	Sphingolipid signaling	9.44506e-11	8.3169e-10	2.99408e-08
KEGG	Central carbon metabolism in cancer	1.26747e-10	1.08591e-09	4.01788e-08
KEGG	NOD-like receptor signaling	1.43232e-10	1.19486e-09	4.54045e-08
KEGG	ErbB signaling	1.93524e-10	1.573e-09	6.13471e-08
KEGG	Prostate cancer	2.17355e-10	1.72254e-09	6.89015e-08
KEGG	Ras signaling	2.79694e-10	2.16251e-09	8.8663e-08
KEGG	Epstein-Barr virus infection	2.99842e-10	2.26309e-09	9.50499e-08
KEGG	Apelin signaling	4.38904e-10	3.23564e-09	1.39133e-07
KEGG	Fc gamma R-mediated phagocytosis	6.88186e-10	4.95807e-09	2.18155e-07
KEGG	p53 signaling	1.0561e-09	7.43964e-09	3.34784e-07
KEGG	Human immunodeficiency virus 1 infection	1.47008e-09	1.01308e-08	4.66015e-07
KEGG	Hepatitis B	1.82868e-09	1.23339e-08	5.79692e-07
KEGG	Phospholipase D signaling	1.82868e-09	1.23339e-08	5.79692e-07
KEGG	Colorectal cancer	1.97456e-09	1.25187e-08	6.25936e-07
KEGG	Lysosome	1.96058e-09	1.26838e-08	6.21504e-07
KEGG	Shigellosis	3.16476e-09	1.96712e-08	1.00323e-06
KEGG	Pancreatic cancer	4.37099e-09	2.66462e-08	1.3856e-06
KEGG	Adherens junction	4.69172e-09	2.80618e-08	1.48728e-06
KEGG	ECM-receptor interaction	5.66245e-09	3.32407e-08	1.795e-06
KEGG	Chagas disease (American trypanosomiasis)	5.8164e-09	3.35236e-08	1.8438e-06
KEGG	Chronic myeloid leukemia	6.84639e-09	3.87555e-08	2.17031e-06
KEGG	Pathogenic Escherichia coli infection	9.2885e-09	5.16571e-08	2.94445e-06
KEGG	Bacterial invasion of epithelial cells	1.16257e-08	6.24635e-08	3.68535e-06
KEGG	Bladder cancer	1.14389e-08	6.25195e-08	3.62613e-06
KEGG	Gastric cancer	1.71293e-08	9.04998e-08	5.42999e-06
KEGG	Amoebiasis	1.87635e-08	9.75087e-08	5.94803e-06
KEGG	AMPK signaling	2.31595e-08	1.18412e-07	7.34156e-06
KEGG	RNA degradation	2.45846e-08	1.23703e-07	7.79332e-06
KEGG	TNF signaling	2.82311e-08	1.39832e-07	8.94926e-06
KEGG	mTOR signaling	2.96947e-08	1.44819e-07	9.41322e-06
KEGG	Small cell lung cancer	3.13301e-08	1.50479e-07	9.93164e-06
KEGG	HIF-1 signaling	3.29293e-08	1.53509e-07	1.04386e-05
KEGG	Peroxisome	3.25122e-08	1.53826e-07	1.03064e-05
KEGG	Herpes simplex infection	3.72057e-08	1.70931e-07	1.17942e-05
KEGG	Viral carcinogenesis	4.1399e-08	1.87478e-07	1.31235e-05
KEGG	Purine metabolism	5.16132e-08	2.30442e-07	1.63614e-05
KEGG	Choline metabolism in cancer	5.45959e-08	2.40374e-07	1.73069e-05
KEGG	Circadian rhythm	6.59911e-08	2.86564e-07	2.09192e-05
KEGG	Lysine degradation	7.15609e-08	3.06551e-07	2.26848e-05
KEGG	Chemokine signaling	9.38219e-08	3.96554e-07	2.97415e-05
KEGG	Wnt signaling	1.26785e-07	5.28827e-07	4.01908e-05
KEGG	Proteasome	1.3269e-07	5.46269e-07	4.20627e-05
KEGG	Ubiquitin mediated proteolysis	1.35151e-07	5.49268e-07	4.28429e-05
KEGG	Leukocyte transendothelial migration	1.63298e-07	6.55259e-07	5.17655e-05
KEGG	Thyroid hormone synthesis	1.76372e-07	6.98874e-07	5.59099e-05
KEGG	Mitophagy - animal	2.51767e-07	9.8531e-07	7.98101e-05
KEGG	Propanoate metabolism	2.87497e-07	1.11142e-06	9.11365e-05
KEGG	Adrenergic signaling in cardiomyocytes	3.14614e-07	1.2016e-06	9.97326e-05
KEGG	Insulin resistance	3.18569e-07	1.20222e-06	0.000100986
KEGG	Pertussis	3.78898e-07	1.41307e-06	0.000120111
KEGG	Thyroid hormone signaling	5.24283e-07	1.93253e-06	0.000166198
KEGG	Cell adhesion molecules (CAMs)	6.32567e-07	2.30487e-06	0.000200524
KEGG	Valine, leucine and isoleucine degradation	6.40027e-07	2.30555e-06	0.000202889
KEGG	Apoptosis	7.37972e-07	2.62851e-06	0.000233937
KEGG	Influenza A	7.66261e-07	2.69894e-06	0.000242905
KEGG	Legionellosis	8.87254e-07	3.09076e-06	0.00028126
KEGG	Insulin signaling	9.46631e-07	3.26176e-06	0.000300082
KEGG	IL-17 signaling	1.07233e-06	3.65515e-06	0.000339929
KEGG	Breast cancer	1.63817e-06	5.52447e-06	0.0005193
KEGG	Human cytomegalovirus infection	2.24522e-06	7.49194e-06	0.000711735
KEGG	Oocyte meiosis	2.58758e-06	8.5444e-06	0.000820263
KEGG	Platelet activation	2.58758e-06	8.5444e-06	0.000820263
KEGG	Signaling pathways regulating pluripotency of stem cells	3.02252e-06	9.77693e-06	0.000958139
KEGG	Cholinergic synapse	3.64869e-06	1.16832e-05	0.00115663
KEGG	Acute myeloid leukemia	4.95214e-06	1.56983e-05	0.00156983
KEGG	Cytokine-cytokine receptor interaction	5.42998e-06	1.68755e-05	0.0017213
KEGG	Parathyroid hormone synthesis, secretion and action	5.42798e-06	1.70363e-05	0.00172067
KEGG	Progesterone-mediated oocyte maturation	7.48792e-06	2.30453e-05	0.00237367
KEGG	Cushing syndrome	7.56929e-06	2.30718e-05	0.00239946
KEGG	Vasopressin-regulated water reabsorption	8.21802e-06	2.48106e-05	0.00260511
KEGG	Rheumatoid arthritis	8.33134e-06	2.49154e-05	0.00264103
KEGG	Dopaminergic synapse	8.83035e-06	2.61609e-05	0.00279922
KEGG	Spliceosome	1.10459e-05	3.24218e-05	0.00350155
KEGG	Amino sugar and nucleotide sugar metabolism	1.14259e-05	3.32295e-05	0.00362201
KEGG	Toxoplasmosis	1.21846e-05	3.51138e-05	0.00386252
KEGG	Glucagon signaling	1.75103e-05	5.00069e-05	0.00555077
KEGG	Gap junction	1.77197e-05	5.01531e-05	0.00561714
KEGG	Prolactin signaling	1.89066e-05	5.30389e-05	0.00599339
KEGG	Longevity regulating	2.32525e-05	6.46583e-05	0.00737104
KEGG	Glioma	2.57992e-05	7.11161e-05	0.00817835
KEGG	Endocrine and other factor-regulated calcium reabsorption	2.90866e-05	7.94867e-05	0.00922045
KEGG	cAMP signaling	3.31356e-05	8.97777e-05	0.010504
KEGG	Hypertrophic cardiomyopathy (HCM)	3.45237e-05	9.27459e-05	0.010944
KEGG	Malaria	4.28226e-05	0.000114074	0.0135748
KEGG	Leishmaniasis	4.67856e-05	0.000123592	0.014831
KEGG	Measles	4.83216e-05	0.000126595	0.0153179
KEGG	Estrogen signaling	5.86451e-05	0.000152381	0.0185905
KEGG	Glutathione metabolism	6.32337e-05	0.000162968	0.0200451
KEGG	Melanogenesis	6.90355e-05	0.000176486	0.0218843
KEGG	DNA replication	7.06677e-05	0.000179213	0.0224017
KEGG	Hedgehog signaling	7.22676e-05	0.000181816	0.0229088
KEGG	JAK-STAT signaling	7.55543e-05	0.000188588	0.0239507
KEGG	Mucin type O-glycan biosynthesis	8.27389e-05	0.000204908	0.0262282
KEGG	Cholesterol metabolism	8.86485e-05	0.000217842	0.0281016
KEGG	Tryptophan metabolism	9.57261e-05	0.000233424	0.0303452
KEGG	GABAergic synapse	0.000124357	0.000300925	0.0394212
KEGG	Glycerophospholipid metabolism	0.000131298	0.000315314	0.0416215
KEGG	beta-Alanine metabolism	0.000133216	0.000317515	0.0422295
KEGG	Longevity regulating pathway - multiple species	0.000134989	0.00031934	0.0427915
KEGG	Hippo signaling pathway - multiple species	0.000142938	0.000333172	0.0453113
KEGG	Non-alcoholic fatty liver disease (NAFLD)	0.000142679	0.000335031	0.0452292
KEGG	Non-small cell lung cancer	0.000148376	0.000340835	0.0470352
KEGG	Terpenoid backbone biosynthesis	0.000147803	0.000341997	0.0468536
KEGG	cGMP-PKG signaling	0.000154097	0.00035143	0.0488487
KEGG	PPAR signaling	0.000170992	0.000387175	0.0542045
KEGG	Pyruvate metabolism	0.000239839	0.000539213	0.076029
KEGG	mRNA surveillance	0.000249236	0.000556393	0.0790078
KEGG	Pyrimidine metabolism	0.000253816	0.000562655	0.0804597
KEGG	Glycerolipid metabolism	0.000291683	0.000642108	0.0924635
KEGG	Toll-like receptor signaling	0.000311976	0.000682044	0.0988964
KEGG	Adipocytokine signaling	0.000332813	0.000722615	0.105502
KEGG	Sphingolipid metabolism	0.000344274	0.000742414	0.109135
KEGG	Endometrial cancer	0.000355597	0.00076165	0.112724
KEGG	Fc epsilon RI signaling	0.000408405	0.000863096	0.129464
KEGG	Thyroid cancer	0.000406281	0.00086437	0.128791
KEGG	Necroptosis	0.000435172	0.000913573	0.13795
KEGG	NF-kappa B signaling	0.000475315	0.000984803	0.150675
KEGG	SNARE interactions in vesicular transport	0.0004727	0.000985828	0.149846
KEGG	Arginine and proline metabolism	0.000640798	0.00131905	0.203133
KEGG	Serotonergic synapse	0.000662277	0.00135446	0.209942
KEGG	Glycolysis / Gluconeogenesis	0.000674647	0.00137092	0.213863
KEGG	T cell receptor signaling	0.000703047	0.00138426	0.222866
KEGG	Fanconi anemia	0.000702303	0.00139144	0.22263
KEGG	Natural killer cell mediated cytotoxicity	0.000699121	0.00139385	0.221621
KEGG	Melanoma	0.000694807	0.00139401	0.220254
KEGG	Hematopoietic cell lineage	0.000712472	0.00139416	0.225854
KEGG	C-type lectin receptor signaling	0.000691291	0.00139579	0.219139
KEGG	GnRH signaling	0.000719194	0.00139868	0.227984
KEGG	One carbon pool by folate	0.000780046	0.00150777	0.247275
KEGG	Dilated cardiomyopathy (DCM)	0.000886954	0.00170403	0.281164
KEGG	B cell receptor signaling	0.00108046	0.00206329	0.342506
KEGG	Ferroptosis	0.00113929	0.0021626	0.361155
KEGG	Glycine, serine and threonine metabolism	0.00113929	0.0021626	0.361155
KEGG	Apoptosis - multiple species	0.00116484	0.00217208	0.369254
KEGG	Fructose and mannose metabolism	0.00116484	0.00217208	0.369254
KEGG	Thermogenesis	0.00116023	0.00217629	0.367793
KEGG	Histidine metabolism	0.00119612	0.00220448	0.37917
KEGG	Fatty acid degradation	0.00127631	0.00233867	0.40459
KEGG	Glycosaminoglycan biosynthesis - chondroitin sulfate / dermatan sulfate	0.00130474	0.00237703	0.413603
KEGG	Ribosome biogenesis in eukaryotes	0.00135919	0.00246208	0.430863
KEGG	Aldosterone-regulated sodium reabsorption	0.00137334	0.00247357	0.435349
KEGG	Oxytocin signaling	0.0014809	0.00265223	0.469445
KEGG	Arrhythmogenic right ventricular cardiomyopathy (ARVC)	0.0016813	0.0029775	0.532972
KEGG	Epithelial cell signaling in Helicobacter pylori infection	0.00167195	0.00297757	0.530008
KEGG	Sulfur metabolism	0.00192228	0.00338535	0.609363
KEGG	Calcium signaling	0.00222104	0.00388989	0.70407
KEGG	Alanine, aspartate and glutamate metabolism	0.00229018	0.00398894	0.725987
KEGG	Inositol phosphate metabolism	0.00254729	0.00441252	0.807491
KEGG	Phosphatidylinositol signaling system	0.00263522	0.00454003	0.835365
KEGG	Glycosylphosphatidylinositol (GPI)-anchor biosynthesis	0.00275337	0.00471794	0.872818
KEGG	Autophagy - other	0.0027687	0.0047187	0.877678
KEGG	Amyotrophic lateral sclerosis (ALS)	0.00304746	0.00516602	0.966045
KEGG	Mineral absorption	0.00304746	0.00516602	0.966045
KEGG	Gastric acid secretion	0.00310592	0.0052094	0.984577
KEGG	Long-term depression	0.00317131	0.00529108	1
KEGG	Circadian entrainment	0.00323584	0.00537048	1
KEGG	Alcoholism	0.00358372	0.00591687	1
KEGG	Non-homologous end-joining	0.00424034	0.0069647	1
KEGG	Renin-angiotensin system	0.00473799	0.00774197	1
KEGG	Drug metabolism - other enzymes	0.00543468	0.00883484	1
KEGG	Huntington disease	0.00556099	0.00899405	1
KEGG	Alzheimer disease	0.00608727	0.00969681	1
KEGG	Glutamatergic synapse	0.00611861	0.009698	1
KEGG	Vibrio cholerae infection	0.00606088	0.00970353	1
KEGG	VEGF signaling	0.00605967	0.00975084	1
KEGG	Selenocompound metabolism	0.00640059	0.0100945	1
KEGG	Complement and coagulation cascades	0.0064764	0.0101635	1
KEGG	Long-term potentiation	0.00711972	0.011118	1
KEGG	Synaptic vesicle cycle	0.00729229	0.0113316	1
KEGG	Staphylococcus aureus infection	0.00752743	0.01164	1
KEGG	Amphetamine addiction	0.00855824	0.0131697	1
KEGG	Insulin secretion	0.00865938	0.013261	1
KEGG	Morphine addiction	0.0112012	0.0170711	1
KEGG	Aldosterone synthesis and secretion	0.0122624	0.018599	1
KEGG	Viral myocarditis	0.0135547	0.0204611	1
KEGG	Citrate cycle (TCA cycle)	0.0138431	0.0207975	1
KEGG	Glyoxylate and dicarboxylate metabolism	0.0138431	0.0207975	1
KEGG	African trypanosomiasis	0.0143732	0.0213911	1
KEGG	Type II diabetes mellitus	0.0145362	0.0215326	1
KEGG	Protein export	0.0160151	0.023613	1
KEGG	Th17 cell differentiation	0.0163079	0.0239334	1
KEGG	Biosynthesis of unsaturated fatty acids	0.0172579	0.0252108	1
KEGG	Cysteine and methionine metabolism	0.0178167	0.0259078	1
KEGG	Valine, leucine and isoleucine biosynthesis	0.0213335	0.03088	1
KEGG	Notch signaling	0.0216331	0.0311713	1
KEGG	Pancreatic secretion	0.022284	0.0318199	1
KEGG	ABC transporters	0.0222489	0.0319136	1
KEGG	Nicotinate and nicotinamide metabolism	0.0288823	0.0410569	1

## Sheet: THCA_Enrich
Pathway Source	Pathway Name	p-value	q-value (FDR: BH-method)	q-value (Bonferroni)
KEGG	Olfactory transduction	1.00819e-14	3.0649e-12	3.0649e-12
KEGG	Estrogen signaling	2.98122e-10	4.53145e-08	9.06291e-08
KEGG	Cytokine-cytokine receptor interaction	6.01631e-07	6.09653e-05	0.000182896
KEGG	Chemokine signaling	2.85133e-06	0.000216701	0.000866804
KEGG	Pathways in cancer	5.99207e-06	0.000364318	0.00182159
KEGG	Arrhythmogenic right ventricular cardiomyopathy (ARVC)	8.58976e-06	0.000435215	0.00261129
KEGG	MAPK signaling	2.20317e-05	0.000837205	0.00669764
KEGG	MicroRNAs in cancer	2.15121e-05	0.00093424	0.00653968
KEGG	Human cytomegalovirus infection	3.64635e-05	0.00123166	0.0110849
KEGG	Calcium signaling	4.16236e-05	0.00126536	0.0126536
KEGG	Hypertrophic cardiomyopathy (HCM)	5.59445e-05	0.00130824	0.0170071
KEGG	Proteoglycans in cancer	5.37481e-05	0.00136162	0.0163394
KEGG	Human papillomavirus infection	5.07466e-05	0.00140245	0.015427
KEGG	NF-kappa B signaling	7.70189e-05	0.00167241	0.0234137
KEGG	Salmonella infection	8.74675e-05	0.00177267	0.0265901
KEGG	PI3K-Akt signaling	0.000118174	0.00224531	0.0359249
KEGG	Focal adhesion	0.000135767	0.00242783	0.0412732
KEGG	ErbB signaling	0.000231804	0.00335564	0.0704684
KEGG	IL-17 signaling	0.000227172	0.00363475	0.0690603
KEGG	Small cell lung cancer	0.000227172	0.00363475	0.0690603
KEGG	Fc epsilon RI signaling	0.00021862	0.00369225	0.0664605
KEGG	Thyroid hormone signaling	0.000359256	0.00496426	0.109214
KEGG	Complement and coagulation cascades	0.000402526	0.00509866	0.122368
KEGG	Insulin signaling	0.000396916	0.00524619	0.120662
KEGG	Dilated cardiomyopathy (DCM)	0.000444244	0.00540201	0.13505
KEGG	Necroptosis	0.000488925	0.00571666	0.148633
KEGG	mTOR signaling	0.00051059	0.00574887	0.155219
KEGG	AMPK signaling	0.000547011	0.00593898	0.166291
KEGG	Inositol phosphate metabolism	0.000699552	0.00733323	0.212664
KEGG	Toxoplasmosis	0.000745716	0.00755659	0.226698
KEGG	Toll-like receptor signaling	0.000824168	0.0078296	0.250547
KEGG	Non-small cell lung cancer	0.00080936	0.00793695	0.246045
KEGG	VEGF signaling	0.00091806	0.00820854	0.27909
KEGG	Pertussis	0.000908008	0.00836468	0.276034
KEGG	Epithelial cell signaling in Helicobacter pylori infection	0.00106557	0.00925524	0.323933
KEGG	Sphingolipid signaling	0.00122406	0.0103365	0.372114
KEGG	Rheumatoid arthritis	0.00137106	0.0112649	0.416802
KEGG	TNF signaling	0.00152009	0.0118489	0.462107
KEGG	ABC transporters	0.00151673	0.0121338	0.461086
KEGG	Chagas disease (American trypanosomiasis)	0.00188541	0.0139796	0.573165
KEGG	Synaptic vesicle cycle	0.00185949	0.0141321	0.565285
KEGG	C-type lectin receptor signaling	0.00229245	0.016593	0.696905
KEGG	Signaling pathways regulating pluripotency of stem cells	0.00278705	0.0188281	0.847263
KEGG	Glycerophospholipid metabolism	0.00285165	0.0188457	0.866902
KEGG	Purine metabolism	0.00274663	0.0189767	0.834976
KEGG	Acute myeloid leukemia	0.00272804	0.0192866	0.829324
KEGG	Transcriptional misregulation in cancer	0.00308266	0.0195235	0.937129
KEGG	Insulin resistance	0.00303756	0.0196472	0.923418
KEGG	Phagosome	0.00325587	0.0201997	0.989784
KEGG	Choline metabolism in cancer	0.00345882	0.0210296	1
KEGG	AGE-RAGE signaling pathway in diabetic complications	0.00379979	0.0226497	1
KEGG	Ribosome	0.00444323	0.0250137	1
KEGG	Phospholipase D signaling	0.00441918	0.0253477	1
KEGG	Prolactin signaling	0.00436576	0.0255229	1
KEGG	ECM-receptor interaction	0.00538278	0.0297521	1
KEGG	Endocytosis	0.00624329	0.0332975	1
KEGG	Cellular senescence	0.00614497	0.0333584	1
KEGG	Osteoclast differentiation	0.00653141	0.0342336	1
KEGG	Amoebiasis	0.00685697	0.034742	1
KEGG	Proteasome	0.00674814	0.0347701	1
KEGG	Pathogenic Escherichia coli infection	0.00729703	0.0363655	1
KEGG	Regulation of actin cytoskeleton	0.00828377	0.0399725	1
KEGG	Neurotrophin signaling	0.0082547	0.0404747	1
KEGG	Sphingolipid metabolism	0.00880614	0.0418292	1
KEGG	Phosphatidylinositol signaling system	0.00964165	0.0450933	1
KEGG	Neuroactive ligand-receptor interaction	0.00992246	0.0457035	1
KEGG	HIF-1 signaling	0.0104596	0.0474585	1
KEGG	Adipocytokine signaling	0.0113254	0.0484919	1
KEGG	Serotonergic synapse	0.011265	0.0489223	1
KEGG	Fc gamma R-mediated phagocytosis	0.0112235	0.0494485	1
KEGG	Lysosome	0.0110722	0.0494992	1

## Sheet: GSE65144_THCA_Inters
68 common elements in "65144" and "THCA":
MicroRNAs in cancer
Endocytosis
Pathways in cancer
PI3K-Akt signaling
Proteoglycans in cancer
Human papillomavirus infection
Focal adhesion
MAPK signaling
Phagosome
Regulation of actin cytoskeleton
Neurotrophin signaling
Salmonella infection
Cellular senescence
AGE-RAGE signaling pathway in diabetic complications
Osteoclast differentiation
Transcriptional misregulation in cancer
Sphingolipid signaling
ErbB signaling
Fc gamma R-mediated phagocytosis
Phospholipase D signaling
Lysosome
ECM-receptor interaction
Chagas disease (American trypanosomiasis)
Pathogenic Escherichia coli infection
Amoebiasis
AMPK signaling
TNF signaling
mTOR signaling
Small cell lung cancer
HIF-1 signaling
Purine metabolism
Choline metabolism in cancer
Chemokine signaling
Proteasome
Insulin resistance
Pertussis
Thyroid hormone signaling
Insulin signaling
IL-17 signaling
Human cytomegalovirus infection
Signaling pathways regulating pluripotency of stem cells
Acute myeloid leukemia
Cytokine-cytokine receptor interaction
Rheumatoid arthritis
Toxoplasmosis
Prolactin signaling
Hypertrophic cardiomyopathy (HCM)
Estrogen signaling
Glycerophospholipid metabolism
Non-small cell lung cancer
Toll-like receptor signaling
Adipocytokine signaling
Sphingolipid metabolism
Fc epsilon RI signaling
Necroptosis
NF-kappa B signaling
Serotonergic synapse
C-type lectin receptor signaling
Dilated cardiomyopathy (DCM)
Arrhythmogenic right ventricular cardiomyopathy (ARVC)
Epithelial cell signaling in Helicobacter pylori infection
Calcium signaling
Inositol phosphate metabolism
Phosphatidylinositol signaling system
VEGF signaling
Complement and coagulation cascades
Synaptic vesicle cycle
ABC transporters
