# Supplementary material for: Using BioPAX-Parser (BiP) to enrich lists of genes or proteins with pathway data
Source: BMC Bioinformatics. 2021 Sep 30;22(Suppl 13):376. doi: 10.1186/s12859-021-04297-z (PMC8482563; doi:10.1186/s12859-021-04297-z)
Supplement: Supplementary file 5 — Additional file 5. The list of relevant enriched pathways(p value \documentclass[12pt]{minimal} \usepackage{amsmath} \usepackage{wasysym} \usepackage{amsfonts} \usepackage{amssymb} \usepackage{amsbsy} \usepackage{mathrsfs} \usepackage{upgreek} \setlength{\oddsidemargin}{-69pt} \begin{document}$$\le 0.005$$\end{document}≤0.005) obtained by SPIA using each cancergene list and the related intersection between the two lists ofenriched pathways referring to the same cancer type. [file 12859_2021_4297_MOESM5_ESM.xlsx]

## Sheet: GSE41011_Enrich
Pathway Source	pathwayName	p-value
KEGG	Cytokine-cytokine receptor interaction	0.001

## Sheet: COAD_Enrich
Pathway Source	pathwayName	p-value
KEGG	Aldosterone-regulated sodium reabsorption	0.001
KEGG	Long-term depression	0.003
KEGG	Glioma	0.004
KEGG	Prostate cancer	0.004

## Sheet: GSE41011_COAD_Inters
0 common elemente in GSE41011 COAD

## Sheet: GSE63678_Enrich
Pathway Source	pathwayName	p-value
KEGG	African trypanosomiasis	5e-06
KEGG	Herpes simplex infection	5e-06
KEGG	Calcium signaling pathway	0.001
KEGG	Chemokine signaling pathway	0.001
KEGG	Amoebiasis	0.001
KEGG	Cell cycle	0.004

## Sheet: UCEC_Enrich
Pathway Source	pathwayName	p-value
KEGG	Mineral absorption	0.002
KEGG
KEGG
KEGG
KEGG
KEGG
KEGG
KEGG
KEGG
KEGG
KEGG
KEGG
KEGG
KEGG
KEGG
KEGG
KEGG
KEGG
KEGG
KEGG
KEGG
KEGG
KEGG
KEGG
KEGG

## Sheet: GSE63678_UCEC_Inters
0 common element in "UCEC" and "GSE63678":

## Sheet: GSE65144_Enrich
Pathway Source	pathwayName	p-value
KEGG	Cytokine-cytokinereceptorinteraction	5e-06
KEGG	Chemokinesignalingpathway	5e-06
KEGG	Focaladhesion	5e-06
KEGG	ECM-receptorinteraction	5e-06
KEGG	Regulationofactincytoskeleton	5e-06
KEGG	Adipocytokinesignalingpathway	5e-06
KEGG	PathogenicEscherichiacoliinfection	5e-06
KEGG	Salmonellainfection	5e-06
KEGG	Pertussis	5e-06
KEGG	Staphylococcusaureusinfection	5e-06
KEGG	Tuberculosis	5e-06
KEGG	Systemiclupuserythematosus	5e-06
KEGG	Toll-likereceptorsignalingpathway	0.001
KEGG	Toxoplasmosis	0.001
KEGG	Smallcelllungcancer	0.001
KEGG	Calciumsignalingpathway	0.002
KEGG	NF-kappaBsignalingpathway	0.003
KEGG	Legionellosis	0.003
KEGG	Apoptosis	0.004

## Sheet: THCA_Enrich
Pathway Source	pathwayName	p-value

## Sheet: GSE65144_THCA_Inters
0 common elements in GSE65144 THCA Intersection
